1 **From microbes to mammals: pond biodiversity homogenization across different land-use types in**  
2 **an agricultural landscape**

3  
4 D. Ionescu<sup>1,2,#,\*</sup>, M. Bizic<sup>1,2,#</sup>, R. Karnatak<sup>1,2</sup>, C. L. Musseau<sup>1,2,3</sup>, G. Onandia<sup>2,4</sup>, M. Kasada<sup>1</sup>, S.A. Berger<sup>1,2</sup>,  
5 J.C. Nejtgaard<sup>1,2</sup>, M., Ryo<sup>4,5</sup>, G. Lischeid<sup>2,4</sup>, M. O. Gessner<sup>1,2,6</sup>, S. Wollrab<sup>1,2</sup>, H.-P. Grossart<sup>1,2,7</sup>

6 (1) Leibniz-Institute of Freshwater Ecology and Inland Fisheries (IGB), Stechlin & Berlin, Germany

7 (2) Berlin-Brandenburg Institute of Advanced Biodiversity Research (BBIB), Berlin, Germany

8 (3) Department of Biology, Chemistry, Pharmacy, Institute of Biology, Free University of Berlin,  
9 Germany

10 (4) Leibniz Centre for Agricultural Landscape Research (ZALF), Müncheberg, Germany

11 (5) Brandenburg University of Technology Cottbus–Senftenberg, Cottbus, Germany

12 (6) Department of Ecology, Berlin Institute of Technology (TU Berlin), Berlin, Germany

13 (7) Institute of Biochemistry and Biology, Potsdam University, Potsdam, Germany

14

15 # These authors contributed equally to the work

16 \* Corresponding author

17

18 **Abstract**

19 Local biodiversity patterns are expected to strongly reflect variation in topography, land use, dispersal  
20 boundaries, nutrient supplies, contaminant spread, management practices and other anthropogenic  
21 influences. In contrast, studies focusing on specific taxa revealed a biodiversity homogenization effect in  
22 areas subjected to long-term intensive industrial agriculture. We investigated whether land use affects  
23 biodiversity and metacommunity structure in 67 kettle holes (KH) representing small aquatic islands  
24 embedded in the patchwork matrix of a largely agricultural landscape comprising grassland, forest, and  
25 arable fields. These KH, similar to millions of standing water bodies of glacial origin, spread across  
26 northern Europe, Asia, and North America, are physico-chemically diverse, differ in the degree of  
27 coupling with their surroundings. We assessed biodiversity patterns of eukaryotes, *Bacteria* and *Archaea*  
28 in relation to environmental features of the KH, using deep-amplicon-sequencing of eDNA. First, we  
29 asked whether deep sequencing of eDNA provides a representative picture of KH biodiversity across the  
30 three domains of life. Second, we investigated if and to what extent KH biodiversity is influenced by the  
31 surrounding land-use. Our data shows that deep eDNA amplicon sequencing is useful for in-depth  
32 assessments of cross-domain biodiversity comprising both micro- and macro-organisms, but, has  
33 limitations with respect to single-taxa conservation studies. Using this broad method, we show that  
34 sediment eDNA, integrating several years to decades, depicts the history of agricultural land-use  
35 intensification. The latter, coupled with landscape wide nutrient enrichment (including by atmospheric  
36 deposition), groundwater connectivity between KH and organismal movement in the tight network of  
37 ponds, resulted in a biodiversity homogenization in the KH water, levelling off today's detectable  
38 differences in KH biodiversity between land-use types.

39

40 **Keywords:** Land-use, eDNA, biodiversity homogenization, intensive-agriculture, kettle hole,  
41 metacommunity

42 **Introduction**

43 The cultural landscape of Central Europe was characterized by low-input farming till the 1950s and early  
44 1960s, after which industrialized agriculture became dominant with greatly increased fertilizer and

45 pesticide use (Bauerkämper 2004, Sommer et al. 2008). Concomitantly, crop diversity decreased by more  
46 than 30% while the total crop coverage of land increased (Meyer et al. 2013). These changes in  
47 agricultural practice had negative consequences on biodiversity, resulting in declining plant (Meyer et al.  
48 2013, Altenfelder et al. 2014), bird (Donald et al. 2006), invertebrate (Wilson et al. 1999) and amphibian  
49 (Berger et al. 2011, 2018) diversity. Furthermore, plant communities became homogenized (Macdonald  
50 and Johnson 2000, Baessler and Klotz 2006), as has commonly been observed after land-use  
51 intensification (Smart et al. 2006).

52 Ponds are intimately linked to their terrestrial surroundings, both the riparian zones immediately  
53 adjacent to the water bodies and the entire watershed due to their small size and topographic position in  
54 landscape depressions (Søndergaard et al. 2005, Kayler et al. 2019). As a result, pond biodiversity tends  
55 to be particularly affected by land use (Declerck et al. 2006), resulting, for instance, in increased organic  
56 matter and nutrient supply; pesticide spread by aerial spray, run-off and groundwater flow (Pérez-Lucas et  
57 al. 2019), leading to changes in plant (Altenfelder et al. 2014) and animal (Berger et al. 2011)  
58 communities.

59 Kettle holes (KH) are small landscape depressions formed on the outwash plains in front of  
60 retreating glaciers at the end of the last ice age. Most fill with water, at least temporarily, which has  
61 resulted in parts of the post-glacial landscapes of northern Europe, northern North America, and northern  
62 Asia being sprinkled with these small water bodies (Downing et al. 2006). For example, more than 90,000  
63 occur in northeastern Germany, with densities reaching up to 40 per km<sup>2</sup> (Kalettka and Rudat 2006). KH  
64 can vary greatly in hydro-geomorphological and biological features, even when they are geographically  
65 close to one another (Attermeyer et al. 2017). Biological activity in KH is high (Nitzsche et al. 2017) and  
66 they also play a critical role as local biodiversity hotspots (Scheffer et al. 2006, Joniak et al. 2007,  
67 Lischeid and Kalettka 2012, Pätzig et al. 2012, Platen et al. 2016, Novikmec et al. 2016), serving as  
68 habitat for insects both with and without aquatic life stages, as refuge and breeding ground for many  
69 amphibians, and as feeding areas for aquatic as well as terrestrial species (Berger et al. 2013, Heim et al.  
70 2018). Accordingly, KH host diverse communities, both aquatic and extending beyond aquatic  
71 boundaries.

72 Water filled KH are aquatic islands embedded in the terrestrial landscape, where local communities  
73 are connected via passive and active overland dispersal to form a metacommunity (Wilson 1992, Leibold  
74 et al. 2004). Such metacommunities are subjected to local dynamics for example via food-web  
75 interactions and regional dynamics by a multitude of mechanisms such as mass and rescue effects,  
76 colonization and deterministic and stochastic extensions (Leibold et al. 2004). The frequent occurrence of  
77 KH in the landscape suggests they serve as stepping stones between habitats located in different land use  
78 types within the landscape (Premke et al. 2016, Kayler et al. 2018). Accordingly, the biodiversity of small  
79 ponds such as KH is disproportionately high (Scheffer et al. 2006) compared to the terrestrial  
80 surroundings, and is directly linked to the degree of connectivity to other ponds (Van Geest et al. 2003).

81 Assessing biological diversity across taxa, from microbes to mammals, is challenging. However, a  
82 promising approach is the use of environmental DNA (eDNA) which provides a common denominator for  
83 all taxa independent of body size and other species traits. Therefore, the analysis of eDNA has been  
84 increasingly applied as a non-invasive, highly sensitive monitoring tool (Deiner et al. 2017, Harper et al.  
85 2019). The approach is based on collecting samples of live, dead, or partially decomposed organisms  
86 containing DNA that can be amplified and taxonomically annotated. Consequently, in highly dynamic  
87 ecosystems such as KH, eDNA methods will show long-term changes in the environment but may miss  
88 immediate effects of the surrounding. Most eDNA approaches aim to detect a specific set of taxa such as  
89 mammals, fish or amphibians by making use of previously identified specific sequences, or omnipresent  
90 genomic markers, such as the small and large subunits of ribosomal RNA genes or the Cox genes (Deiner  
91 et al. 2017, Andújar et al. 2018, Bylemans et al. 2019, Beng and Corlett 2020). Despite several downsides  
92 that have been recognized, such as misinterpretation of sequence frequencies or of presence and absence  
93 of taxa (Roussel et al. 2015, Harper et al. 2019), the approach has proved particularly useful for analyses

94 motivated by species-specific conservation or restoration efforts. Importantly, however, it is also possible  
95 to use eDNA to assess biological diversity as a whole, facilitated by the use of genomic markers that  
96 capture all life forms.

97 In the present study, we embarked on a multi-seasonal analysis of cross-taxa biodiversity patterns in  
98 contrasting KH using deep sequencing (>200,000 reads per sample separately for *Bacteria*, *Archaea*,  
99 eukaryotes) of eDNA. These KH are characterized by three different land-use types embedded in a  
100 agriculture dominated landscape: arable fields, grassland, and forest.

101 We defined three main goals of the study: 1) evaluate whether deep sequencing of eDNA is a reliable  
102 approach for broad qualitative biodiversity assessments, providing representative, in depth information on  
103 a wide range of organisms, 2) assess the magnitude of the effect land-use type has on aquatic biodiversity,  
104 and 3) test to what extent the observed landscape-scale patterns depend on land use type. We  
105 hypothesized that biodiversity in KH surrounded by grassland and particularly by forest represents a more  
106 natural state than kettle holes embedded in agriculture fields, resulting in richer local communities within  
107 individual KH ( $\alpha$  diversity) and more heterogeneous communities across KH within the more natural  
108 land-use categories ( $\beta$ -diversity).

## 109 **Methods**

### 110 **Study sites and sampling**

111 Samples for eDNA analysis were collected during 5 sampling campaigns of 2-3 days each in December  
112 2016, and March, May, June and October 2017. All samples were taken in a set of 67 kettle holes located  
113 in northeastern Germany (Fig. 1). The area, one of the least populated in Germany, has a long history of  
114 farming, with >90% of the land now being covered by arable fields (Kalettka and Rudat 2006), although  
115 some of that land has been reconverted to grassland nearly two decades ago (Serrano et al. 2017). Routine  
116 monitoring of the KH water and riparian vegetation in the area started in 1993, shortly after the  
117 reunification of Germany (Kalettka and Rudat 2006). Each KH was categorized based on land-use type  
118 within a perimeter of ca. 50 m around the kettle holes, i.e. distinguishing KH in arable fields, grasslands,  
119 and forest patches (Fig. 1).

120 Water samples were collected whenever enough water was present in the KH. Some occasionally fell dry,  
121 however (Nitzsche et al. 2017), and thus could not be sampled at all times, particularly in October 2017.  
122 To obtain representative samples, total volumes of ca. 20 L were collected at 5-15 locations selected  
123 within each KH, with the number of individual samples depending on KH size. The samples were pooled  
124 in cleaned buckets and 2 L were subsampled in the field, placed in ice chests containing a mixture of ice  
125 and table salt to lower the temperature during transport, and subsequently frozen at -80 °C in the  
126 laboratory for later eDNA analysis.

127 Sediment cores were taken at three time points (Table S1). In March 2017, sediment samples were  
128 collected from 54 of the 67 KH, both wet and dry. In some instances, a dense mat of belowground plant  
129 parts prevented sediment coring. Subsequently, sediment cores were only collected from wet KH that had  
130 recently dried out, or from previously dry KH that had refilled. Between 3-7 cores were taken per KH,  
131 depending on KH size, covering both littoral and central areas. The cores were sectioned into surface  
132 (upper 5 cm) and lower (5-20 cm depth) sediment layers to try and separate current benthic community  
133 from older resting stages and preserved eDNA. The sections were separately transferred into plastic bags  
134 were subsampled (1 g wet weight) for eDNA extraction. Both the complete samples and subsamples were  
135 stored at -80 °C for further processing. DNA extractions from multiple cores representing surface or  
136 lower sediment layers of a given KH at each sampling date were pooled. A compilation of the collected  
137 samples is given in Table S1.

138

### 139 **Analysis of physico-chemical properties**

140 Temperature, conductivity, pH, redox potential, and oxygen concentration and saturation were measured  
141 on site during sampling using a multiparameter field probe (HI98194, Hanna Instruments, Vöhringen,  
142 Germany). Additional water (1 L) was collected to determine concentrations of nutrients and major ions.  
143 These samples were immediately frozen in an ice chest containing crushed ice mixed with table salt  
144 (NaCl) and analyzed within 48 h. Water analysis followed German standard methods (DIN 38405, 2018).  
145  $\text{Ca}^{2+}$ ,  $\text{Mg}^{2+}$ ,  $\text{K}^+$ ,  $\text{Na}^+$ , and total Fe were analyzed by inductively coupled plasma optical emission  
146 spectrometry (ICP-iCAP 6300 DUO, ThermoFisher Scientific GmbH, Dreieich, Germany).  $\text{Br}^-$ ,  $\text{Cl}^-$ ,  $\text{NO}_3^-$ ,  
147  $\text{NO}_2^-$  and  $\text{SO}_4^{2-}$  were analyzed using ion chromatography (882 Compact IC plus, Deutsche Metrohm  
148 GmbH & Co. KG, Filderstadt, Germany). Ammonium ( $\text{NH}_4^+$ ) and soluble reactive phosphorus (ortho-  
149 phosphate; o- $\text{PO}_4^{3-}\text{-P}$ ) were measured spectrophotometrically (SPECORD 210 plus, Analytik Jena AG,  
150 Jena, Germany). Total phosphorus (TP) was measured as soluble reactive phosphorus after microwave  
151 digestion (Gallery™ Plus, Microgenics GmbH, Hennigsdorf, Germany). Dissolved organic carbon  
152 (DOC), total organic carbon (TOC) and total nitrogen (TN) were determined using an elemental analyzer  
153 (TOC-VCPH, Shimadzu Deutschland GmbH, Duisburg, Germany) with chemiluminescence detection.  
154 The specific absorption coefficient (SAC) was measured on a spectrophotometer (SPECORD 210 plus,  
155 Analytik Jena AG, Germany) as a proxy of dissolved aromatic carbon content (Weishaar et al., 2003).  
156 Finally, the SAC:DOC ratio was used as a rough measure of DOC quality.

### 157 DNA extraction

158 The collected 2-L water samples were sequentially filtered (Nalgene filtration tower; ThermoFisher  
159 Scientific, Dreieich, Germany) to prevent clogging The filters used were polycarbonate membrane filters  
160 (pore size of 10 and 5  $\mu\text{m}$ ), combusted GF/F filters and finally polycarbonate filters with a pore size of  
161 0.2  $\mu\text{m}$  (47 mm diameter of all filters). The GF/F filter was included owing to its charge to capture naked  
162 eDNA and DNA released from cells lysed by freezing and thawing. All filters were rinsed twice with 50  
163 mL autoclaved MilliQ water to remove salts, and subsequently flash frozen and stored at  $-80^\circ\text{C}$ .

164

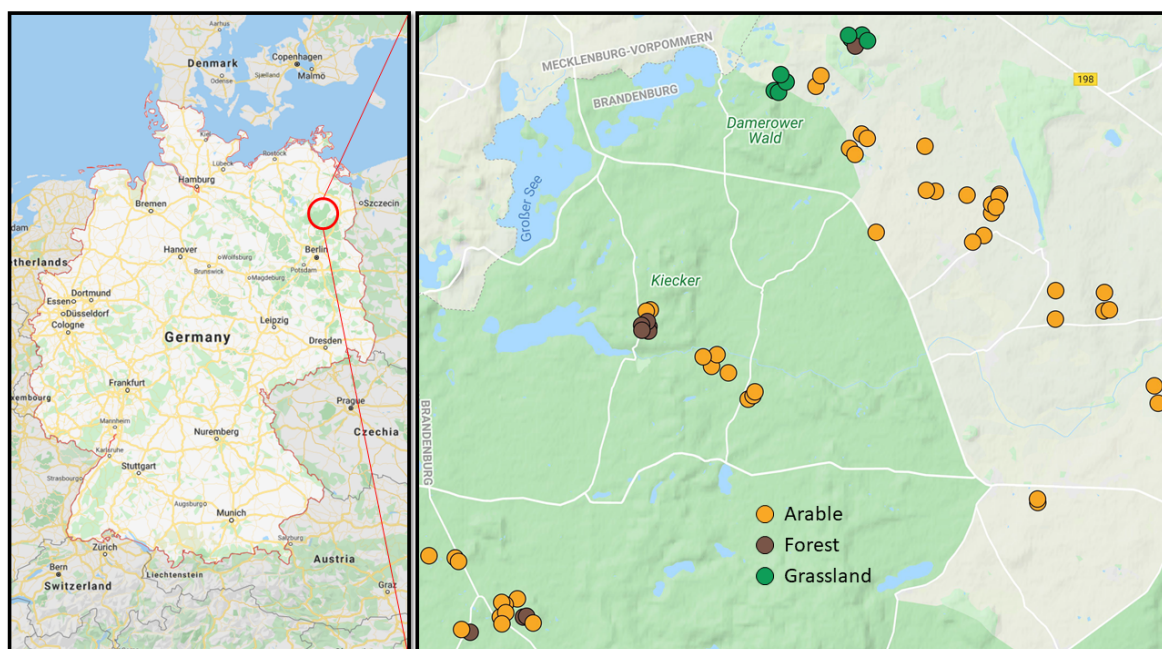

166 **Figure 1.** Map showing the location of the sampling area (125 km<sup>2</sup>) ca. 100 km north of the city of  
167 Berlin, Germany (left panel) and local distribution of three types of sampled kettle holes (KH) in arable  
168 fields (n = 47), forests (n = 11) and grassland (n = 9) (right panel). Map generated with Google Maps  
169 online tools.



170

171 Total (environmental) DNA was extracted from 329 samples consisting of 182 water samples, 75 surface  
172 sediment samples (< 5 cm), and 66 deeper sediment (5-20 cm) samples. To prevent analytical biases  
173 (Bálint et al. 2018), the different filtered subsamples were extracted in separate, randomly selected  
174 batches. DNA was extracted with phenol/chloroform according to a method modified by Nercessian et al.  
175 (2005). In brief, a CTAB extraction buffer containing SDS and N-laurylsarcosine was added to the  
176 samples together with an equal volume of phenol/chloroform/isoamylalcohol (25:24:1) solution. The  
177 samples were subject to bead-beating (FastPrep-24™ 5G Instrument, MP Biomedical, Eschwege,  
178 Germany), followed by centrifugation (14,000 g), a cleaning step with chloroform, and DNA precipitation  
179 with PEG-6000 (Sigma-Aldrich, Taufkirchen, Germany). The precipitated DNA was rinsed with 1 mL of  
180 70% ethanol, dried and dissolved in water. Finally, all extracts from the same sample were pooled and  
181 kept at -80 °C till further processing.

## 182 Sequencing

183 Sequencing was conducted separately for the SSU rRNA gene of *Archaea*, *Bacteria* and eukaryotes at  
184 MrDNA (Shallowater, TX, USA) using the following primers: Arch2A519F (5' CAG CMG CCG CGG  
185 TAA 3') and Arch1071R (5' – GGC CAT GCA CCW CCT CTC - 3') for archaea (Fischer et al., 2016);  
186 341F (5' CCT ACG GGN GGC WGC AG 3') and 785R (5' GAC TAC HVG GGT ATC TAA TCC 3')  
187 for bacteria (Thijs et al. 2017); and Euk1560F (5' TGG TGC ATG GCC GTT CTT AGT 3') and  
188 Euk2035R (5' CAT CTA AGG GCA TCA CAG ACC 3') for eukaryotes (Hardy et al. 2010). The primers  
189 were barcoded on the forward primer and used in a 30-cycle PCR using the HotStarTaq Plus Master Mix  
190 Kit (Qiagen, Hilden, Germany) under the following conditions: 94 °C for 3 min, followed by 30 cycles at  
191 94 °C for 30 s, 53 °C for 40 s and 72 °C for 1 min, followed by a final elongation step at 72 °C for 5 min.  
192 The PCR products were checked in 2% agarose gel to determine success of the amplification and relative  
193 band intensity. To ensure high coverage of rare taxa, batches of 20 samples were pooled for each  
194 sequencing run in equal proportions based on their molecular weight and DNA concentrations. The PCR  
195 products were purified using calibrated Ampure XP beads and then used to prepare an Illumina DNA  
196 library. Paired end 2 x 300 bp sequencing was performed on a MiSeq sequencer (Illumina, Inc., San  
197 Diego, CA. USA) following the manufacturer's instructions. Sequence data are available at the NCBI  
198 Short Read Archive under project number PRJNA641761.

## 199 Bioinformatic analysis

200 Paired end reads were merged using BBMerge from the BBMap package (part of JGI tools;  
201 <https://sourceforge.net/projects/bbmap>), after which the joined reads were quality trimmed and  
202 demultiplexed using cutadapt (V 1.16) to remove reads of low quality (q > 20) and shorter than 150 nt.  
203 Taxonomic annotation was performed for all reads from all samples without clustering based on the  
204 SILVA SSU NR99 data base (V132; Quast et al., 2013). This was accomplished by using PhyloFlash (V  
205 3.3 b1; <https://github.com/HRGV/phyloFlash>; Gruber-Vodicka et al., 2019) and Kraken 2 (Wood et al.  
206 2019). To improve the annotation of eukaryotic taxa, a new database was created consisting of all  
207 eukaryotic sequences in the SILVA SSU Parc database (V138). The SILVA Parc database also includes  
208 eukaryotic sequences shorter than 900 nucleotides and hence covers a much broader range of species than  
209 the SILVA NR99 database. The eukaryotic sequences from all samples were annotated using both  
210 PhyloFlash and the SINA aligner (Pruesse et al., 2012; V 1.6; <https://github.com/epruesse/SINA>)  
211 requiring a minimum consensus of 3 sequences for last common ancestor assignments. The resulting  
212 annotations were merged according to taxonomic names and presence/absence matrices were generated to  
213 account for the qualitative nature of the eDNA method especially when merging data from separate  
214 assays (i.e. separately targeting *Archaea*, *Bacteria*, and eukaryotes). Statistical analyses (see next section)  
215 using matrices generated by different annotation tools resulted in identical patterns.

216

## 217 **Statistical analysis**

218 Multivariate (NMDS, PCA, CAP, Permanova) and diversity (richness and evenness) analyses were  
219 conducted using the Primer6 (V 6.1.1) + Permanova Package (V 1.0.1, Primer-E, Quest Research  
220 Limited, Auckland, New Zealand). NMDS was conducted using Bray-Curtis dissimilarity, retaining the  
221 ordination with the lowest calculated stress out of 1000 iterations. Permanova was used to test for the  
222 effect of land-use type, seasonality (i.e. time of sampling) or both. CAP (Canonical Analysis of Principal  
223 coordinates) was used to present the data according to factors found to have a significant effect by  
224 Permanova. Distance-Based Linear Models with Redundancy Analysis (DBLM-RDA) were used to test  
225 for the effects of water chemistry on community structure. Univariate analyses (ANOVA, Kruskal-Wallis  
226 and Dunn's test), and diversity indices (Chao I, taxa richness, evenness) were calculated using the PAST3  
227 software (Hammer et al. 2009). Since the data available in the sequence databases (e.g. SILVA) are not of  
228 uniform quality, not all sequences could be annotated to the same taxonomic resolution. Therefore,  
229 richness was assessed using the highest assignable taxonomic resolution

230 Ternary plots were generated using the *ggtern* package (Hamilton and Ferry 2018) in R V3.5 (The R Core  
231 Team 2018). Indicator species analysis was performed using the *indicspecies* R package (V.1.7.8; Cáceres  
232 and Legendre, 2009) testing for the IndVal index, as well as Pearson's phi coefficient of association  
233 (Chytrý et al. 2002). The latter was used both on presence/absence data and sequence frequencies while  
234 considering the appropriate functions and required corrections as outlined in the *indicspecies* package  
235 manual (ver. 1.7.8). Indicator species analysis was conducted using the most elaborate annotation matrix  
236 (containing 50,000 taxa across the 3 domains *Archaea*, *Bacteria*, and eukaryotes). Additionally, the  
237 analysis was corrected for the greater number of sites in arable fields than in grasslands and forests. Data  
238 for ternary plots was generated as the percent presence of a specific taxon in each land-use group.

239 Rarefaction curves and cross-sample species accumulation curves were calculated using the *specaccum*  
240 function in the R *Vegan* library (Oksanen et al. 2006) and Primer6 (V 6.1.1, Primer-E, Quest Research  
241 Limited, Auckland, New Zealand), respectively.

242

## 243 **Results**

### 244 **Water chemistry**

245 Physical and chemical properties of the water (Fig. 2 and Table S2) highlight the temporal variability of  
246 parameters within kettle holes (KH) throughout the study. Variation among samples per land-use type as  
247 well as combined sampling campaign and land-use type are shown in Figs S1 and S2, respectively, along  
248 with information on statistically significant differences. Water chemistry of the surveyed KH varied  
249 among sampling dates and both within and among land-use types, but systematic differences among land-  
250 use types were small. Only KH surrounded by forest significantly differed from KH in arable fields and  
251 grasslands, and that only in some parameters such as conductivity and concentrations of DOC and most  
252 ions, but not nutrients (Fig. S1). In contrast, water chemistry and other environmental parameters did not  
253 differ between KH in arable fields and grasslands, even when data from different sampling campaigns  
254 were analyzed separately, the only exception being temperature (Fig. S2). The extent of seasonal  
255 variability and the timing when parameter-specific maxima or minima were observed differs among  
256 individual KH (Fig. 2A). Principle component analysis based on the maximal number of available  
257 parameters for the largest possible number of samples (143 of 182 water samples) did not separate KH  
258 according to land-use type (Fig. 2B). However, a seasonal pattern emerged between spring (March) and  
259 summer (June) with the smaller subset of autumn (October) samples being closer to spring samples,  
260 primarily driven by temperature, O<sub>2</sub> saturation, DOC and nutrient concentrations (Fig. 2C). Conductivity  
261 and concentrations of several ions also significantly influenced the ordination, but reflected neither  
262 seasonality nor land-use type. All KH would be classified as eutrophic to hypereutrophic based on water  
263 chemistry data (Wetzel 2001). However, it is difficult to fully determine the trophic state of the KH in this

264 study for two main reasons. First, no obvious relation was observed between O<sub>2</sub> saturation and nutrient  
 265 load at the time of sampling, except for TP in March and May (Fig. S3). Second, primary and secondary  
 266 productivity, an essential part of measuring eutrophication (Khan and Ansari 2005) were not determined

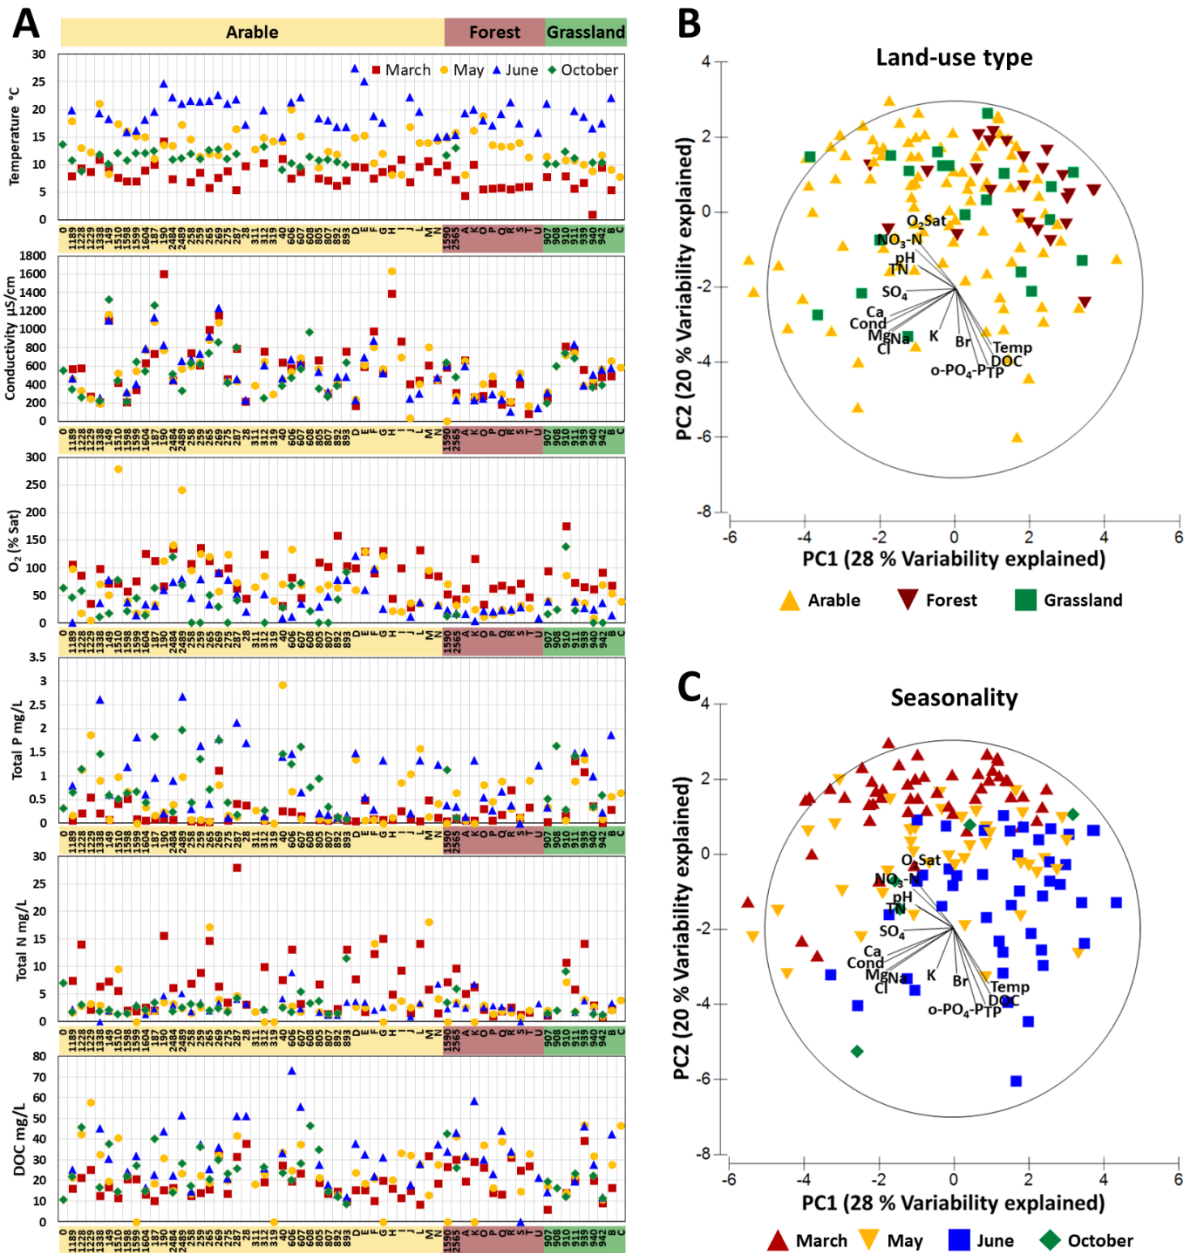

267 in this study.

268

269 **Figure 2.** Variability among and within KH in terms of major physical and chemical variables determined  
 270 during 5 sampling campaigns (A). Principle component analysis of water chemistry data, with samples  
 271 labeled according to land-use type (B) or month of sampling (seasonality) (C).

272

273 **Sequencing effort**

274 Separate sequencing assays resulted in  $8.35 \times 10^7$  archaeal,  $11.6 \times 10^7$  bacterial, and  $11.4 \times 10^7$  eukaryotic  
 275 SSU rRNA gene sequences per assay, averaging  $3.24 \times 10^6$  sequences per sample (Table S3). Reads of  
 276 eukaryotes were assigned to a large number of taxa (Supplementary dataset 1), including worms,  
 277 mollusks, arthropods, amphibians, fish, birds and mammals, some of which were evidently rare or  
 278 occasionally present in the KH.

### 279 $\alpha$ -diversity

280 The Chao I index shows that overall organismal diversity was greater in sediments than in water. No  
 281 significant differences among land-use types were observed in either sediment (Fig. 3A) or water (Fig.  
 282 3B) when the data were grouped according to land-use type (Fig. 3A). This holds when the data were  
 283 analyzed together across all sampling campaigns and also when each campaign was inspected separately.

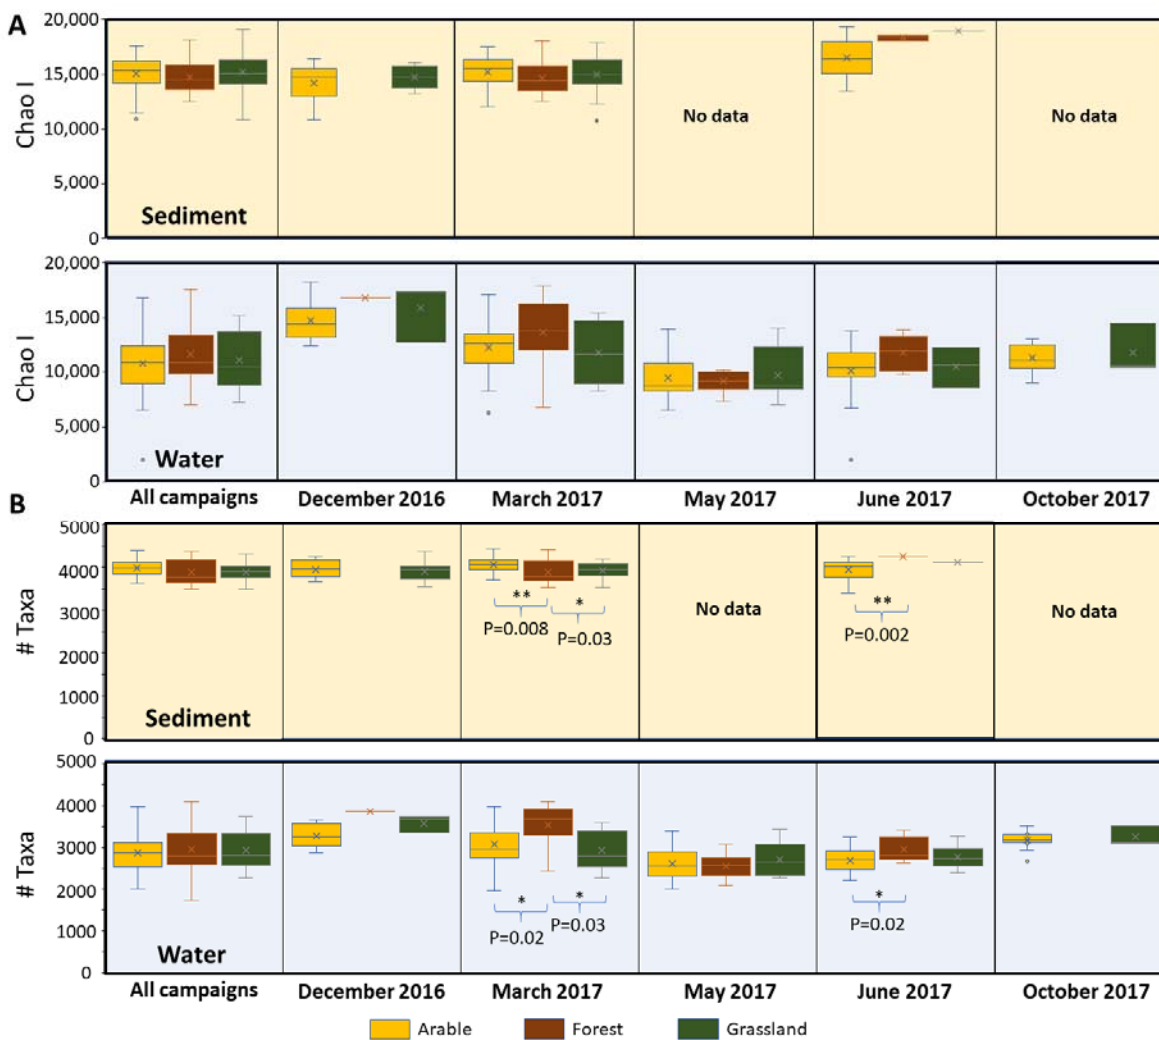

284  
 285 **Figure 3** Richness assessment based on Chao I index accounting for the number of taxa for which  
 286 singleton and doubleton sequences were obtained (A) and taxonomic richness which considers presence /  
 287 absence alone (B). Whiskers mark the 25<sup>th</sup> and 75<sup>th</sup> percentile. Samples are grouped according to the  
 288 assigned land use type and include *Archaea*, *Bacteria*, and eukaryotes data. Sediment and water samples  
 289 are separated for both indices. In both cases sequences were grouped according to taxonomic annotations  
 290 and were not clustered into distance-based operational taxonomic units. As not all sequences could be  
 291 resolved to the same taxonomic depth (i.e. order, family, genus, species), these indices likely  
 292 underestimate the true diversity. ANOVA and Kruskal – Wallis tests showed no overall difference



293 between the land use types. However, when pairs of groups were compared using Mann-Whitney's and  
 294 Dunn's tests significant differences were found as marked in the figure.

295

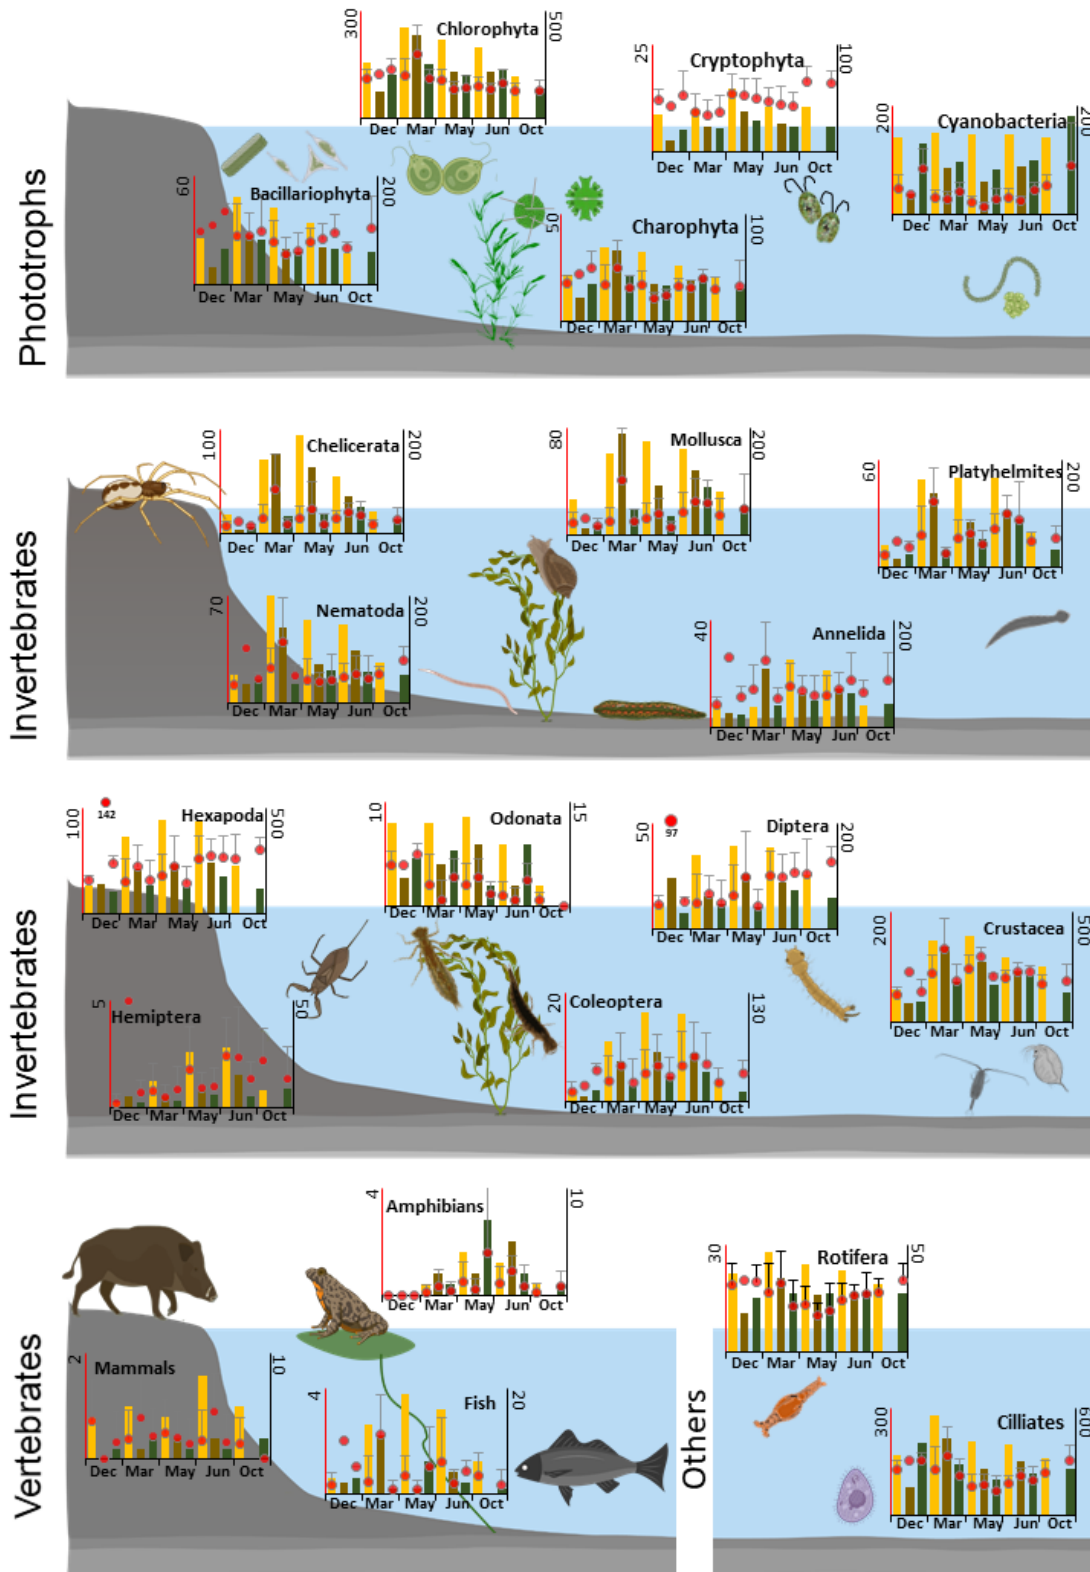

296

297 **Figure 4.** Average apparent species richness (no. of taxa) of selected functional groups per KH from each  
298 land-use type for the different sampling periods (left axis, red circles) alongside the summed richness (no.  
299 of taxa) per land-use for the same periods (right axis, bars). Yellow, brown, and green bars stand for  
300 arable, forest and grassland land use types, respectively. This figure was partially created with  
301 BioRender.com.

302  
303 Depending on the annotation tool used to analyze the data, a total of 13,000 to 50,000 taxonomic entities  
304 were identified. Despite the large spread, trends similar to those shown in Fig. 3 were observed in all  
305 cases. Therefore, we chose a more stringent analysis which provided less taxonomic resolution by  
306 grouping sequences into broad taxonomic groups (e.g. into families rather than genera or genera rather  
307 than species). No statistically significant difference in taxon richness was observed among land-use types  
308 when all water or sediment samples were analyzed together (Fig. 3B). When analyzed according to  
309 sampling period, forest KH water samples collected in March 2017 harbored a higher diversity than  
310 samples from KH in grassland or arable fields (Fig. 3B). In contrast, sediment samples collected in March  
311 from KH in arable fields harbored more taxa than forest and grassland samples collected at the same time.  
312 Samples taken in June show a higher diversity in sediments of forest KH than in those of arable fields,  
313 and a similar pattern is apparent in the matching water samples. However, sediment data from the forest  
314 KH might be biased because the number of samples was low.

315 Both taxonomic richness and Chao I show that alpha diversity in water samples across all land-use types  
316 was higher in winter and early spring (i.e. December and March), reaching a minimum in mid-spring  
317 (May) and increasing again towards winter (Fig. 3B).

318 We further assessed richness at different time points within different functional groups across the  
319 different land-use types (Fig. 4). In most of the depicted groups, an increase in apparent richness (i.e.  
320 more species detected) was observed in spring (March, May). This increase and peak in richness occurred  
321 across all land use types, although at different magnitudes and not always in parallel. The largest number  
322 of species per land use was mostly found in arable fields, followed by forest and grasslands (ANOVA  
323  $p < 0.001$ ). However, a comparison of species accumulation curves suggests there was no difference in  
324 richness among the land-use types and therefore the evidently higher number of species detected in arable  
325 fields is a result of having more sampling sites (Fig. S4). In contrast, forest KH harbored the largest  
326 number of different species per KH (ANOVA  $p = 0.02$ ) while KH from arable fields and grasslands were  
327 often similar (Mann-Whitney  $p = 0.6$ ).

## 328 **$\beta$ -diversity**

329 Given that eDNA data are non-quantitative across the three domains of life (*Bacteria*, *Archaea*,  
330 eukaryotes), specifically with respect to multicellular taxa, the sequence frequency data was converted to  
331 presence / absence data. Separate analyses making use of sequence frequency as a proxy for abundance  
332 while excluding eukaryotic taxa did not notably alter the presented result (Fig. S5).

333 NMDS analysis shows a clear separation between community composition of sediment and water samples  
334 (Fig. 5A), which accounts for ca. 15 % of the variability across all samples ( $p = 0.001$ ). Water samples  
335 were separated according to sampling period (Fig. 5B), explaining ca. 11 % of the variability between  
336 samples ( $p = 0.001$ ). This percentage increases to 18 % when sequence frequencies are used instead of  
337 presence/absence data ( $p = 0.001$ ). In contrast, differentiating the samples according to land-use type  
338 shows no distinct pattern (Fig. 5C), although PERMANOVA analysis shows it is statistically significant  
339 ( $p = 0.018$ ), explaining only ca. 2 % of the variability between the samples. Breaking down the arable  
340 fields into the specific crops (at the time of sampling) did not improve explanatory power. Redundancy  
341 analysis using data from the 143 water samples for which all physical and chemical information is  
342 available reveals a separation based on sampling time point, similarly to the NMDS analysis, with a clear  
343 horizontal separation that appears to be mainly driven by temperature (Fig. 5D). Physical and chemical

344 parameters cumulatively explain 23 % of the total variability among samples, with the contribution of  
 345 most parameters being significant ( $p < 0.001$  to 0.018), except for concentrations of  $\text{Cl}^-$  ( $p = 0.08$ ) and  $\text{Br}^-$   
 346 ( $p = 0.35$ ). Temperature, strongly correlating with the seasonal gradient, has the largest explanatory power  
 347 among all parameters, accounting for 7 % of the total variability among samples.

348

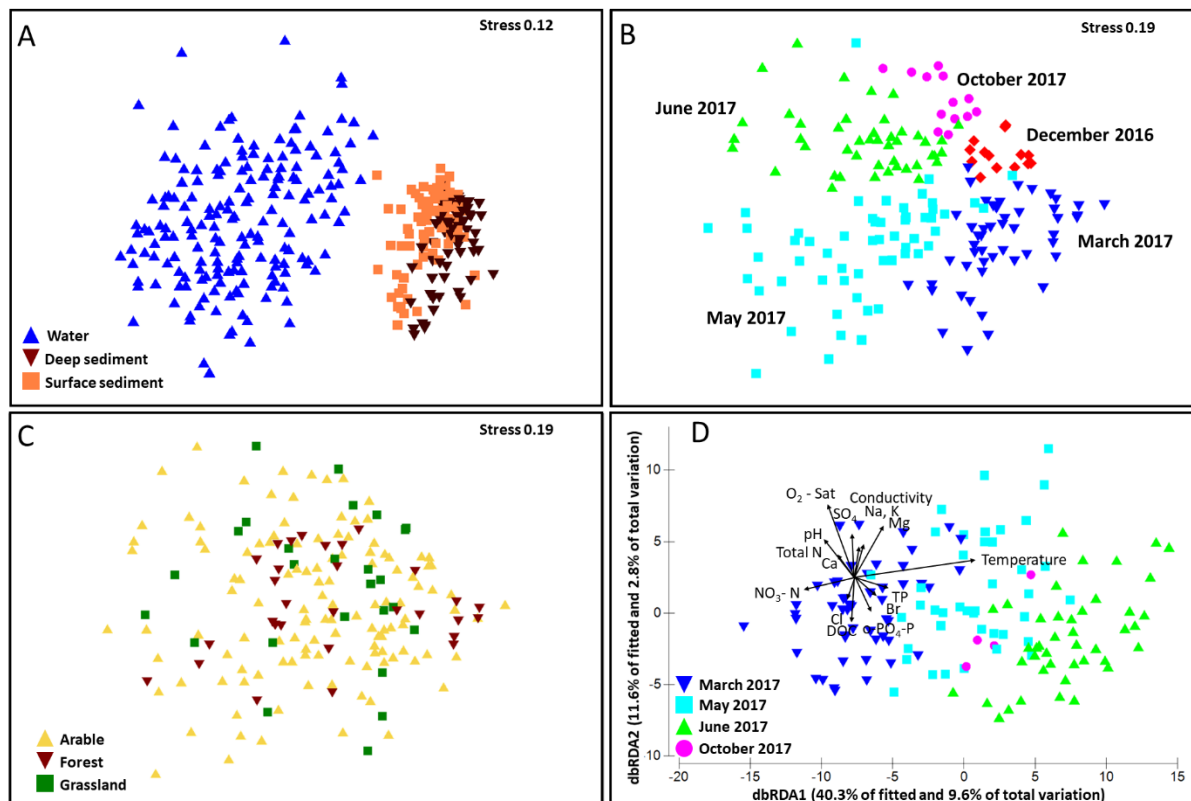

349 **Figure 5** Nonmetric multidimensional scaling (NMDS) of sampled communities revealed a separation  
 350 between the total community of water and sediment samples (A) and a seasonal clustering of the aquatic  
 351 communities (B), but no land-use-based ordination patterns (C). A distance-based linear model and  
 352 redundancy analysis (D) shows a seasonal separation of the water samples alongside the statistically  
 353 significant environmental parameters, with temperature being the main driver. A three-dimensional  
 354 NMDS analysis improves the fit, reducing the stress in panels A, B and C to 0.09, 0.12 and 0.12,  
 355 respectively

356  
 357  
 358 To further explore the species distribution based on land-use type, we conducted an indicator species  
 359 analysis of the water and sediment data using both a presence / absence matrix and sequence frequencies.  
 360 The patterns were virtually identical (Fig. 6A). No taxa were restricted to a single land-use category. A  
 361 larger number of taxa were associated with forest or grassland than with arable fields in both sediment  
 362 and water samples. The top 5 bacterial and eukaryotic associated taxa per land-use type are presented in  
 363 Table S4 and the complete results are given in Supplementary Dataset 2. In both analyses the number of  
 364 taxa associated with arable fields was higher in sediment than in water samples. A similar pattern was  
 365 observed when looking at species associated with two land-use types, one of which is arable fields (Fig.  
 366 6A). A graphical representation of taxa associated with different land-use types by means of ternary plots  
 367 reveals a similar result (Fig. 6B). Most of the taxa appear to be neutral with regard to land-use type, as  
 368 indicated by the dark blue to red color points clustered in the center of the plots. Only individual taxa,

369 represented by the purple color, spread from the center towards specific land-use types. High correlations,  
370 indicated by taxa present in the colored triangles at the vertexes of each plot, are rare. However, overall  
371 sediment samples are more inclined towards arable fields than water samples, whereas the latter are more  
372 inclined towards forest and grassland. Separate analyses of bacteria (*Bacteria* and *Archaea*) and  
373 eukaryotes in sediments show the same distribution pattern. By contrast, eukaryotes in water samples  
374 appear to contribute more to the communities associated with forests, and bacteria to that associated with  
375 grasslands.

376 We tested whether land-use type influences the distribution of taxa in the entire community or specific  
377 taxonomic groups with different trophic functionality (i.e. primary producers and different level  
378 consumers), and whether the influence was more pronounced in sediment than in water (Table 1). This  
379 was compared to the effect of seasonality which had overall a greater effect on the total community. We  
380 defined land-use effect as a significant difference in biodiversity or community structure detectable when  
381 data from all sampling campaigns are pooled. For microorganisms we compared presence / absence data  
382 and sequence frequencies. For larger multicellular organisms that are unlikely to have been sampled  
383 intact, this quantitative data is likely biased because differently-sized body fragments could have been  
384 sampled falsely amplifying the amount of DNA without any change in number of organisms. Therefore,  
385 the comparisons were limited to presence / absence data. Breaking down the arable-field land-use type  
386 into specific crops grown during the sampling period, had no additional explanatory power in any of our  
387 analyses.

388 Land-use type had a minimal effect on the whole community, which was slightly larger in the sediment  
389 samples (Table 1). In contrast, seasonality had a much larger effect on the community as a whole and also  
390 for *Archaea*, *Bacteria* and eukaryotes separately, explaining 11, 9 and 16 % of the variability in taxa  
391 composition in the water samples, respectively. Accounting for the sequence frequencies increased the  
392 effects of both seasonality and land-use type for bacteria (from 9 to 16 % and 2 to 5 %, respectively). A  
393 similar effect was obtained for sequence frequencies of eukaryotes (from 4 to 6 % for land-use type and  
394 from 5 to 20 % for seasonality); however, because of possible differences in the representation of  
395 multicellular organisms in different samples, this data should be interpreted with caution.

396 For both total eukaryotic phytoplankton and *Cyanobacteria*, the same pattern was observed as for the total  
397 community. Land-use type had a stronger influence on biodiversity in the sediment, and seasonality on  
398 biodiversity in the water samples. Nevertheless, when separating the eukaryotic phytoplankton into  
399 taxonomic groups, land-use type had a stronger effect on *Chlorophyta* and *Charophyta* detected in the  
400 water column. The latter group was dominated by filamentous or single-celled planktonic species from  
401 the orders *Klebsormidiales*, *Desmidiiales*, and *Zygnematales*. Land-use type had no effect on *Cryptophyta*,  
402 *Bacillariophyta* and *Rhodophyta*. Accounting for sequence frequency, significantly increased the percent  
403 of variability explained by land-use for eukaryotic phytoplankton in sediment samples and in some cases  
404 also in water samples. Land-use type had no effect on diatoms (*Bacillariophyta*) or *Rhodophyta*  
405 regardless of whether presence/absence data or sequence frequencies are analyzed.



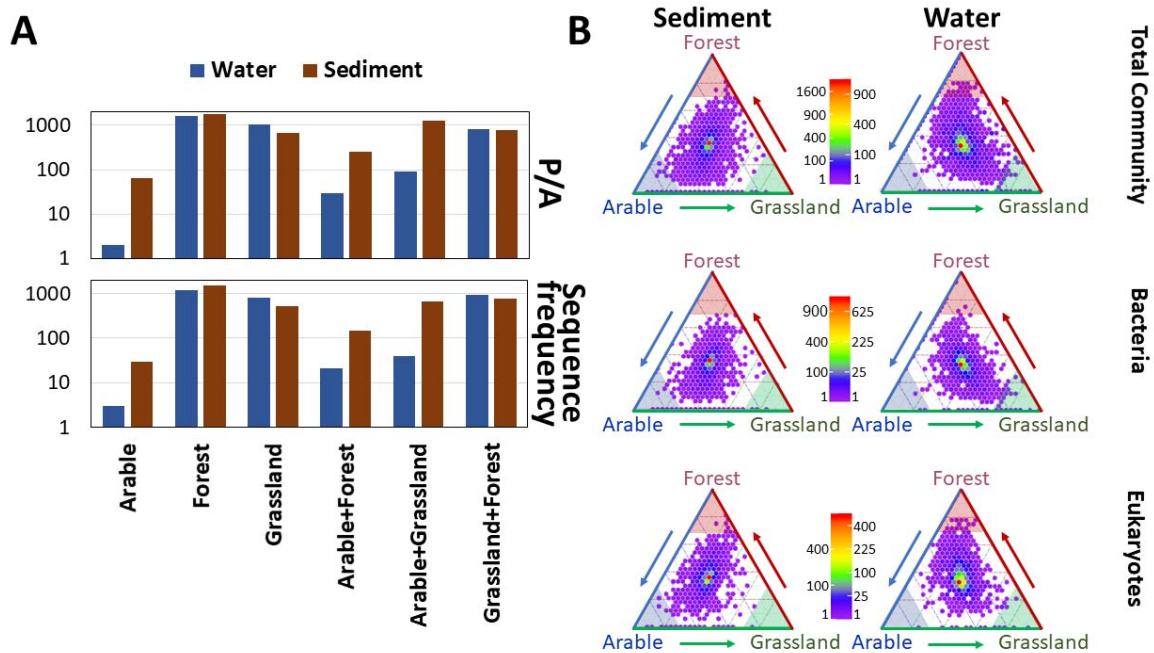

406

407

408 **Figure 6.** Indicator species analysis of taxa in all water and sediment samples calculated by using either a  
 409 presence/absence (P/A) matrix as most suitable for eDNA data (upper A panel) or sequence frequency  
 410 (lower A panel), which is possible because the analysis is based on single taxa. Taxa association with a  
 411 single land-use type was exclusive as clearly shown in the ternary plots (panel B). The ternary plots depict  
 412 the association of each taxon to specific land-use types which are represented by the three vertexes of  
 413 each triangle. Individual taxa are pooled into hexagonal shapes for graphical purposes. The term  
 414 “Bacteria” refers to both *Bacteria* and *Archaea*. The color scale refers to the square root of the number of  
 415 taxa in each colored point with purple representing single taxa and dark red the maximum number. As  
 416 indicated by the color code, most taxa appear in the middle of the plot and are hence generalists with  
 417 respect to land-use type.

418

419 Similarly, accounting for abundance, increases the percent variability explained by land-use type for other  
 420 eukaryotic microorganisms such as fungi, *Oomycota*, and *Rotifera*, but not for heterotrophic flagellates.  
 421 Overall, with few exceptions, seasonality remained the main explanatory factor of aquatic taxa diversity,  
 422 while land-use explains best the diversity in sediments.

423 The species composition of larger multicellular organisms such as insects and major sub-phyla within  
 424 crustaceans and molluscs is mainly explained by seasonality with the variability of only some of the  
 425 groups partially explained by land-use type. Among these, the Odonata (dragonflies and damselflies)  
 426 stand out with 23 % of the variability in taxonomic composition in sediment samples being explained by  
 427 land-use type.

428

429

| Presence / Absence         | Land Use |      | Seasonality |      |
|----------------------------|----------|------|-------------|------|
|                            | Water    | Sed. | Water       | Sed. |
| <b>Total Community</b>     | 3        | 4    | 11          | 5    |
| <i>Bacteria</i>            | 2        | 0    | 9           | 3    |
| <b>Eukaryotes</b>          | 4        | 5    | 16          | 9    |
| <b>Cyanobacteria</b>       | 7        | 0    | 15          | 15   |
| <b>Euk. Phyto.</b>         | 0        | 5    | 16          | 8    |
| <b>Bacillariophyta</b>     | 0        | 0    | 17          | 13   |
| <b>Charophyta</b>          | 0        | 0    | 13          | 4    |
| <b>Chlorophyta</b>         | 0        | 5    | 15          | 6    |
| <b>Rhodophyta</b>          | 0        | 0    | 12          | 8    |
| <b>Cryptophyta</b>         | 0        | 7    | 13          | 0    |
| <b>Other algae</b>         | 0        | 4    | 12          | 5    |
| <b>Fungi</b>               | 5        | 0    | 16          | 6    |
| <b>Oomycetes</b>           | 0        | 0    | 7           | 0    |
| <b>Labyrinthulomycetes</b> | 0        | 0    | 11          | 0    |
| <b>Ciliates</b>            | 0        | 0    | 16          | 7    |
| <b>Rotifera</b>            | 0        | 7    | 10          | 7    |
| <b>Alveolata</b>           | 0        | 6    | 15          | 6    |
| <b>Rhizaria</b>            | 0        | 0    | 12          | 0    |
| <b>Amoeba</b>              | 0        | 9    | 17          | 9    |
| <b>Het. Flagellates</b>    | 0        | 0    | 0           | 7    |
| <b>Insecta</b>             | 6        | 0    | 26          | 17   |
| <b>Hexapoda</b>            | 6        | 0    | 26          | 16   |
| <b>Odonata*</b>            | 10       | 23   | 35          | 0    |
| <b>Diptera</b>             | 6        | 0    | 26          | 16   |
| <b>Hemiptera*</b>          | 10       | NA   | 28          | NA   |
| <b>Coleoptera</b>          | 0        | 0    | 21          | 13   |
| <b>Chelicerata</b>         | 0        | 0    | 21          | 16   |
| <b>Crustacea</b>           | 6        | 0    | 13          | 9    |
| <b>Myriapoda</b>           | NA       | 0    | NA          | 0    |
| <b>Annelida</b>            | 0        | 0    | 17          | 9    |
| <b>Nematoda</b>            | 0        | 7    | 19          | 19   |
| <b>Platyhelminthes</b>     | 5        | 0    | 24          | 14   |
| <b>Mollusca</b>            | 7        | 0    | 14          | 11   |
| <b>Porifera</b>            | 0        | 0    | 7           | 0    |
| <b>Other Euk.</b>          | 3        | 7    | 15          | 8    |

| Abundance                  | Land Use       |                 | Seasonality     |                 |
|----------------------------|----------------|-----------------|-----------------|-----------------|
|                            | Water          | Sed.            | Water           | Sed.            |
| <b>Total Community</b>     | 6 <sup>#</sup> | 10 <sup>#</sup> | 17 <sup>#</sup> | 8 <sup>#</sup>  |
| <i>Bacteria</i>            | 5              | 0               | 16              | 8               |
| <b>Eukaryotes</b>          | 6 <sup>#</sup> | 14 <sup>#</sup> | 20 <sup>#</sup> | 10 <sup>#</sup> |
| <b>Cyanobacteria</b>       | 11             | 11              | 17              | 18              |
| <b>Euk. Phyto.</b>         | 7              | 15              | 20              | 10              |
| <b>Bacillariophyta</b>     | 0              | 0               | 17              | 17              |
| <b>Charophyta</b>          | 0              | 11              | 18              | 8               |
| <b>Chlorophyta</b>         | 0              | 17              | 20              | 8               |
| <b>Rhodophyta</b>          | 0              | 0               | 10              | 0               |
| <b>Cryptophyta</b>         | 8              | 14              | 18              | 0               |
| <b>Other algae</b>         | 5              | 17              | 15              | 5               |
| <b>Fungi</b>               | 7              | 15              | 18              | 7               |
| <b>Oomycetes</b>           | 0              | 12              | 10              | 5               |
| <b>Labyrinthulomycetes</b> | 0              | 15              | 10              | 0               |
| <b>Ciliates</b>            | 5              | 16              | 20              | 8               |
| <b>Rotifera</b>            | 7              | 20              | 15              | 9               |
| <b>Alveolata</b>           | 6              | 15              | 19              | 0               |
| <b>Rhizaria</b>            | 0              | 14              | 16              | 0               |
| <b>Amoeba</b>              | 11             | 17              | 16              | 11              |
| <b>Het. Flagellates</b>    | 0              | 0               | 12              | 15              |
| <b>Insecta</b>             | NA             | NA              | NA              | NA              |
| <b>Hexapoda</b>            | NA             | NA              | NA              | NA              |
| <b>Odonata*</b>            | NA             | NA              | NA              | NA              |
| <b>Diptera</b>             | NA             | NA              | NA              | NA              |
| <b>Hemiptera*</b>          | NA             | NA              | NA              | NA              |
| <b>Coleoptera</b>          | NA             | NA              | NA              | NA              |
| <b>Chelicerata</b>         | NA             | NA              | NA              | NA              |
| <b>Crustacea</b>           | NA             | NA              | NA              | NA              |
| <b>Myriapoda</b>           | NA             | NA              | NA              | NA              |
| <b>Annelida</b>            | NA             | NA              | NA              | NA              |
| <b>Nematoda</b>            | NA             | NA              | NA              | NA              |
| <b>Platyhelminthes</b>     | NA             | NA              | NA              | NA              |
| <b>Mollusca</b>            | NA             | NA              | NA              | NA              |
| <b>Porifera</b>            | NA             | NA              | NA              | NA              |
| <b>Other Euk.</b>          | NA             | NA              | NA              | NA              |

430

431 **Table 1:** Percent contribution of land use and seasonality to the  $\beta$ -diversity in water and sediment  
432 samples. Statistically non-significant results (PERMANOVA,  $p > 0.05$ ) are listed as 0 % contribution.  
433 Groups marked with an asterisk (\*) were not present in all samples. Hemiptera were not detected in  
434 enough sediment samples to obtain statistically meaningful results. Quantitative data (i.e. sequence  
435 frequency) was only used for microorganisms, which are better represented given our sample size and  
436 more likely to have been sampled intact. Therefore, quantitative analysis of the eukaryotic community  
437 may be biased. Those percentages are marked with a superscript hashtag (<sup>#</sup>).

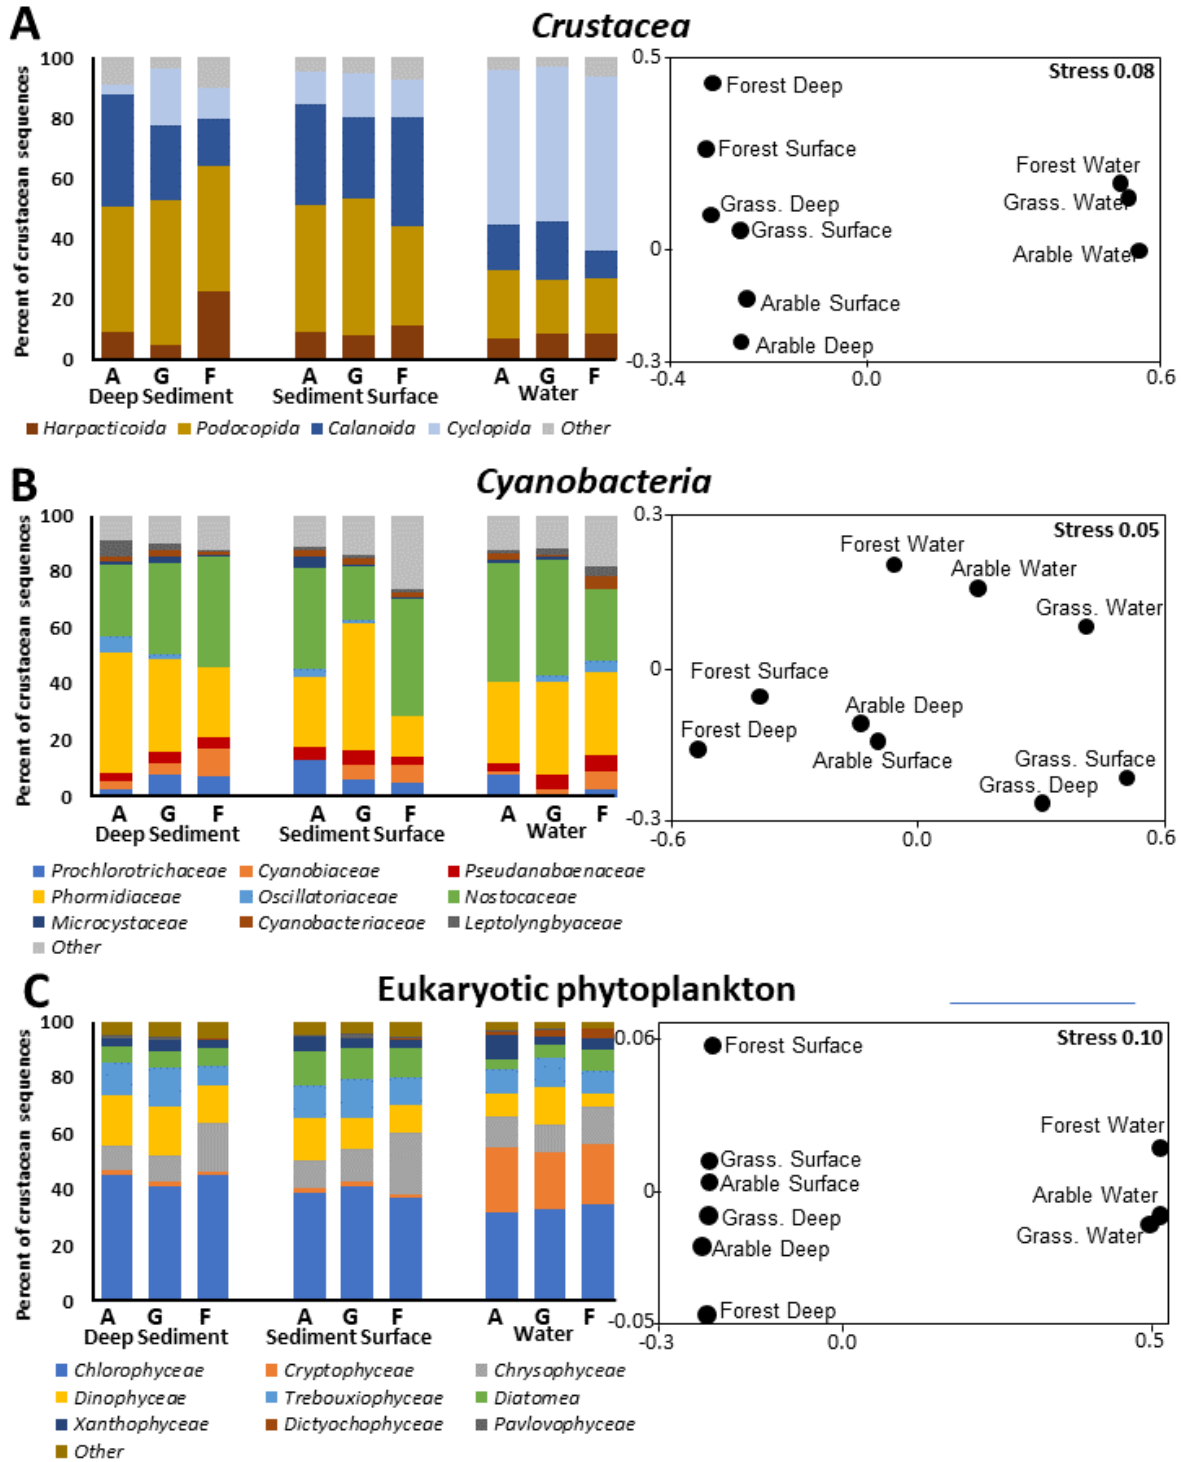

438

439 **Figure 7.** General community composition of crustaceans (A), *Cyanobacteria* (B), and eukaryotic  
 440 phytoplankton (C) in deep sediments (5-15 cm), surface sediments (0-5 cm) and water samples. The  
 441 NMDS figures for each group show projections of similarities among the different sample types. Land-  
 442 use types: A = arable fields, G = grassland, F = forest.

443

444 Using *Crustacea*, *Cyanobacteria*, and eukaryotic phytoplankton we evaluated whether the organisms in  
445 the sediment are of planktonic or benthic origin (Fig. 7A-C) and to what extent the sediment and water  
446 communities differed from one another. Planktonic copepods (*Calanoida* and *Cyclopida*) and benthic  
447 copepods (*Harpacticoida*) as well as ostracods (Podocopida) were present in the deep and shallow  
448 sediment as well as in the water. However, the crustacean community structure differed significantly  
449 between the water and sediment and between sediment samples from KH surrounded by different land-  
450 use types (Fig. 7A). Similarly, despite their dependence on light for photosynthesis, *Cyanobacteria* (Fig.  
451 7B) and eukaryotic phytoplankton (Fig. 7C) occurred not only in water samples but also in sediments.  
452 The water and sediment communities differed from one another in both cases. However, while for  
453 *Cyanobacteria* land-use type clearly separated the sediment sample, eukaryotic phytoplankton  
454 communities from arable fields and grassland sediments were similar. Interestingly, eukaryotic  
455 phytoplankton groups from deep and shallow sediments are separated (Fig. 7C).

456

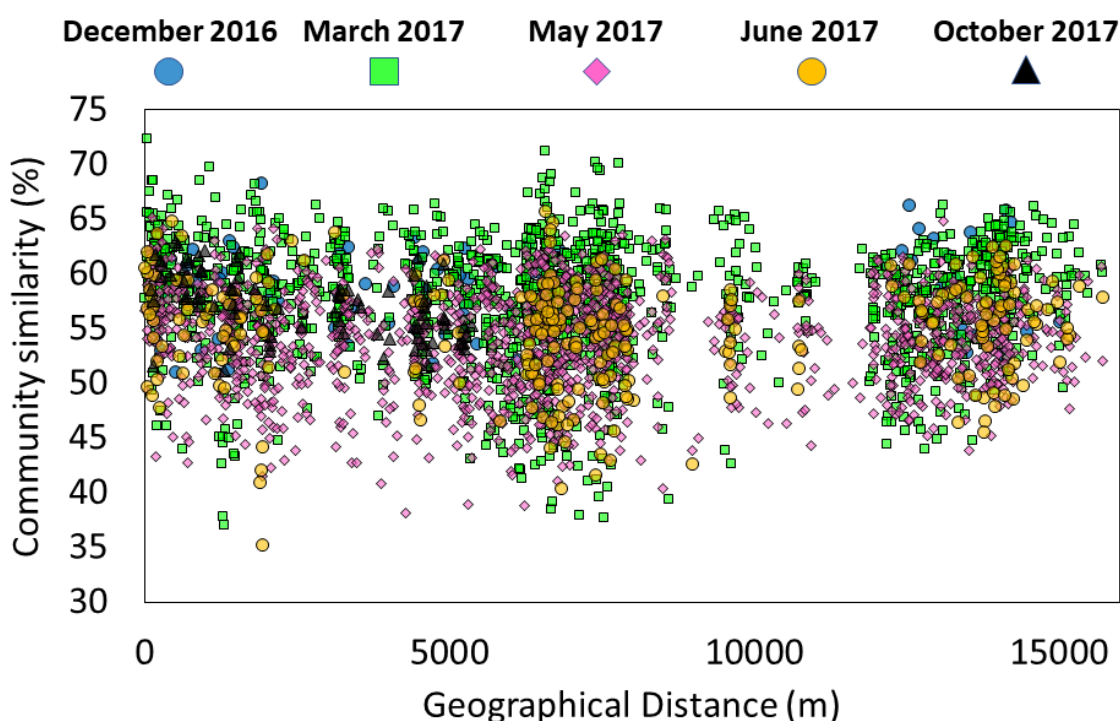

458 **Figure 8.** Bray-Curtis similarities between all sample pairs as calculated from a binary (presence absence)  
459 taxa matrix and plotted against the geographical distance between the two samples. Plots of the different  
460 sampling campaigns are overlaid and distinguished by color. A plot depicting all combinations of sample-  
461 pairs and hence accounting for possible lag effects in species dispersal does not reveal any significant  
462 correlation (data not shown).

463 In several cases, adjacent KH were attributed to different land-use types. Therefore, we sought to see if  
464 geographical proximity affected the similarity in community composition of KH. In none of the tested  
465 cases were KH close to each other (10s of meters apart) more similar than the more distant ones (up to 10  
466 km apart). These results do not change when sequence frequencies were used as proxy instead of presence  
467 absence data (data not shown). Second, to verify this observation and to test whether geographical  
468 distance affects only certain taxa in our sampling area, a taxon-wise spatial autocorrelation test was  
469 conducted. This analysis found no correlation between the distribution of taxa and their geographical  
470 location (See section on Spatial Autocorrelation calculations in supplementary material).



## 471 Discussion

472 In this study we addressed two main questions. First, we sought to evaluate whether a deep-amplicon-  
473 sequencing approach of eDNA provides a detailed, nearly complete, snapshot of the biodiversity in small  
474 water bodies, such as KH. For this purpose, we used the small subunit of the ribosomal RNA as a general  
475 marker, rather than searching for target organisms using taxa specific methods such as specific primers or  
476 microarrays (Deiner et al. 2017, Bylemans et al. 2019). Second, by using the above approach, we  
477 investigated the magnitude of the effect land-use type in the surroundings of small water bodies has on  
478 aquatic biodiversity.

## 479 Deep sequencing of eDNA

480 Broad-target amplicon sequencing has been used for biodiversity studies for nearly four decades with  
481 ever-evolving taxa coverage, in particular as evolving databases allow for better design of new primers  
482 and sequencing depth increases as technology evolves. Therefore, we chose to couple this established  
483 approach with methods for capturing rare and naked DNA as utilized in eDNA studies. At the same time,  
484 we used a separate deep sequencing approach for each of the 3 domains: *Archaea*, *Bacteria*, and  
485 eukaryotes to improve the assay specificity and the chances of recovering rare taxa within each domain.

486 Our analysis focused on taxonomic entities and did not account for microdiversity (i.e. strain variability in  
487 marker gene sequence) as can be resolved by defining amplicon sequence variants. This choice, following  
488 the approach of the Silva NGS analysis pipeline (Ionescu et al. 2012), considers identical taxonomic  
489 entities as likely to have identical or similar functionality, though in the case of microorganisms these  
490 entities may be represent ecotypes coming from two adjacent yet separate microniches within one KH.  
491 Rarefaction curves separately calculated for each sample and for *Bacteria*, *Archaea* and eukaryotes (Fig.  
492 S6) show that more than 50 % of the total discovered taxa per sample were discovered in the first 25 % of  
493 the sequences and a clear decrease in discovery rate was observed already before. Given the sequencing  
494 depth and the large sample volume, it is not surprising that despite this decrease, new taxa were  
495 continuously discovered without apparently approaching an asymptote (Huber et al. 2007, Dethlefsen et  
496 al. 2008). A large portion of the reads is, therefore, due to the discovery of relatively rare taxa  
497 contributing to more than 50 % of the overall number of discovered taxa. Accordingly, following the  
498 rarefaction curve criteria defined in Schöler et al. (2017), our data are sufficient to cover most of the  
499 diversity. Sample-wise taxon accumulation plots show that 75 % of the total number of the observed taxa  
500 was represented by less than 25 % of the samples (Fig. S7), supporting the notion that overall diversity  
501 was well covered. Alternative taxonomic annotation pipelines (e.g. Kraken2) resulted in lower taxonomic  
502 diversity, i.e. sequences attributed to different organisms in the presented annotations are merged into  
503 single taxa by those alternative methods. Therefore, the results of our rarefaction analyses represent an  
504 upper boundary and perhaps an overestimation of taxonomic diversity, suggesting that the sequencing  
505 depth we used had even a greater coverage.

506 The bacterial and archaeal community composition is not informative regarding the coverage of rare  
507 species and overall diversity. This is due to the high abundance of these tiny cells in water, typically  
508 ranging between  $10^5$  and  $10^8$  mL<sup>-1</sup> (Bižić-Ionescu et al. 2015) and the large volume of water concentrated  
509 for the sequence analyses. In contrast, our samples likely contained mostly microscopic eukaryotes as  
510 intact organisms, while larger taxa can be partly derived from decomposing cells and naked DNA in the  
511 water. Therefore, the discovery of multicellular taxa such as plants, insects, amphibians, fish, birds and  
512 mammals, whose DNA is expected to be rare in the volume sampled, demonstrates the success in  
513 capturing the nature of most permanent, and some transient, organisms in the specific water body. This is  
514 in line with the taxa-independent rarefaction curves discussed above, suggesting that most of the diversity  
515 in the collected samples was captured. The presence of vertebrates such as fish, birds and mammals could  
516 be confirmed either by direct observations or recent tracks on the KH shores, whereas the diversity of  
517 benthic macroinvertebrates and rotifers matches or exceeds those observed in parallel surveys using  
518 classical microscopic methods (G. Onandia and C. Musseau, unpublished data). This is consistent with

519 previous studies. Although the taxonomic annotation of sequences largely depends on the quality and  
520 comprehensiveness of the databases used, the diversity coverage is independent. Accordingly, it has been  
521 repeatedly shown that the species detection and sensitivity of eDNA-based studies exceeds that of  
522 classical methods (Deiner et al. 2017, Emilson et al. 2017, Fernández et al. 2018, Kim et al. 2019, Yang  
523 and Zhang 2020).

524 We therefore conclude that our deep eDNA amplicon sequencing approach of general marker genes can  
525 capture the overall (but not absolute) biodiversity across the domains of life in small water bodies,  
526 providing a reliable qualitative overview of resident and transient organisms, including resting stages in  
527 the sediment. Nevertheless, even samples for which *ca.* 3 million reads were obtained, the coverage of the  
528 taxonomic diversity did not reach a plateau. Accordingly, the coverage obtained in the present study  
529 would be too low to analyze microdiversity. Studies targeting specific taxa or a single taxon will benefit  
530 from a more targeted approach using designated primers for one or more genes. However, deep  
531 sequencing of eDNA marker genes provides a reliable, rapid, and cost-effective method when a detailed  
532 cross-taxa overview and total-biodiversity assessment is desired, for instance in surveys motivated by  
533 conservation efforts.

### 534 **Land-use effects on biodiversity in water**

535 Land use is expected to affect the composition of both permanent and transient members of aquatic  
536 communities. For example, intensive agriculture has been shown to result in the decrease in plant (Meyer  
537 et al. 2013, Altenfelder et al. 2014), bird (Donald et al. 2006), invertebrates (Wilson et al. 1999) and  
538 amphibian (Berger et al. 2011) diversity. Similarly, differences in communities have been documented  
539 between ponds in urban vs. rural environments (Joniak et al. 2007, Akasaka et al. 2010) and between lotic  
540 waters in forested and agricultural landscapes (Fasching et al. 2020). We tested for land-use effects on  $\alpha$ -  
541 and  $\beta$ -diversity in the water column and sediment of the sampled KH. Taxonomic richness, Chao I and  
542 rarefaction curves all show sediments to be more diverse than water. As sequencing depth (Fig. S7) and  
543 sampled biomass are comparable between sediments and water, this may be a result of more niches being  
544 available for microorganisms in sediments, but could also be due to long-term (decades) accumulation of  
545 dead organisms and naked DNA. The difference between the sediment and water community is likely  
546 driven by the long-term accumulation of DNA from different periods of the KH, the presence of eggs and  
547 resting stages, the anoxic nature of submerged sediments selecting for specific organisms and the likely  
548 introduction of DNA from terrestrial organisms, in part during dry periods. In contrast, the water column  
549 samples merely represent snapshots of the current community.

550 Richness does not differ between land-use types, neither in sediment nor in water samples. This does not  
551 change when taxa are separated into the three domains of life (i.e. *Archaea*, *Bacteria*, eukaryotes; Fig.  
552 S8). Some significant differences are apparent when samples of different sampling campaigns are  
553 separately analyzed. Specifically, taxonomic richness is higher in forest water samples collected in March  
554 and June, suggesting a stronger seasonal than land-use effect. In several cases, forest samples also stand  
555 out with respect to environmental parameters (Fig. S1). This is in contrast to grassland and arable fields,  
556 which are generally not significantly different from one another. The latter may be a result from weak  
557 organismal dispersal barriers in the open land, whereas forest KH could be shielded by an arborous buffer  
558 zone. In addition, tree cover also results in reduced evaporation, alters the light regime and provides  
559 higher input of organic matter as plant litter. Additionally, land-use type is not a permanent feature with  
560 transitions of grasslands to arable fields being more common than the other way around (Nitsch et al.  
561 2012, Serrano et al. 2017).

562 The effect of seasonality (time of sampling) is further evident in  $\beta$ -diversity where more of the variability  
563 between samples can be explained by the sampling period rather than land-use type. The percent  
564 variability of the water chemistry that can be explained by seasonality is much lower than that of  $\beta$ -  
565 diversity (2.5 % vs. 25 %). Thus, it is unlikely that the seasonality effect on the communities is driven by  
566 seasonal changes in chemical parameters. The  $\gamma$ -diversity of different taxa (with similar and different

567 trophic function) (Fig. 4) further shows many groups of organisms that follow seasonal changes in  
568 richness. These changes are reflected in an increase in richness in early or late spring, often followed by a  
569 decrease in summer and autumn across all three land-use types. The latter could be the result of some  
570 organisms, such as insects, with life cycles that include aquatic stages and emergence in (late) spring.

571 Comparing the percent variability explained by seasonality to that explained by land-use type for the  
572 entire community, or for selected taxonomic groups, it becomes evident that seasonality is the main factor  
573 determining community composition. This suggests that species can inhabit or pass through (actively or  
574 passively) all land-use types according to their annual cycle. However, when inspecting the different  
575 distribution patterns of each taxon across the land-use types, it becomes evident that the land-use type  
576 influences the relative abundance of specific taxa, i.e. their ability to establish a local population. This is  
577 clearly apparent for microorganisms in our dataset, and may also have been the case for larger organisms  
578 as suggested by our sediment data (e.g. Crustaceans – Fig. 7B). However, for larger organisms this cannot  
579 generally be evaluated without a more targeted approach.

580

### 581 **Land-use effects on biodiversity in sediments**

582 Incorporating sequence frequency in the analysis as a proxy for abundance of microorganisms enhanced  
583 the percent of variability explained for some of the analyzed taxonomic groups, specifically when applied  
584 to the sediment compartment. This suggests that sediment possess a ‘memory’ which in part document  
585 the response of aquatic biodiversity to the intensification of agriculture in the region since the early 1950s  
586 (Bauerkämper 2004). A previous analysis of carbon and nitrogen isotopes in relation to changes in land  
587 use suggests a long-term effect of agriculture can be traced in sediments of the KH in our study area.  
588 eDNA degradation in sediments is significantly slower than in the water column (Harrison et al. 2019,  
589 Sakata et al. 2020). The occurrence of planktonic phototrophs (eukaryotic algae and cyanobacteria) in  
590 sediment, particularly in deeper layers (>5 cm), is a direct evidence of the resulting accumulation of DNA  
591 from past communities in the sediments. This is further supported by DNA of planktonic crustaceans  
592 found also in both sediment layers distinguished in our study. This implies that our analysis of eDNA in  
593 sediments also reflects the distribution of organisms integrated over the sedimentation period. A corollary  
594 of this conclusion is that comparisons of the eDNA of such pelagic taxa between surface-water and  
595 sediment samples can inform about past communities and could thus be related to long-term changes in  
596 land use or other important environmental factors.

597 The sedimentation rates previously estimated from two KH that are part of the present study (KH258 and  
598 KH807; Kleeberg et al., 2016) correspond to an average age of 15-30 years prior to this study in the upper  
599 5 cm and to 50-100 years at 20 cm depth. These values are in line with previous studies in the area, which  
600 concluded that the sedimentation rate increased from 1-2 mm y<sup>-1</sup> prior to 1960, to 5 mm y<sup>-1</sup> afterwards  
601 (Frielinghaus and Vahrson 1998). However, sedimentation rates determined in similar KH in Poland  
602 (Karasiewicz et al. 2014) based on <sup>14</sup>C dating of organic matter, placed the upper 5 and 20 cm as old as  
603 900 and 1500 years ago, respectively. Meij et al., (2019), while supporting the 100 year range, show  
604 large variability among the KH in the study area. Accordingly, depending on the sedimentation rate (and  
605 extent of sediment re-working) in the different KH, the increased percent of explained variability in the  
606 sediment fraction, either for the total community or for specific taxonomic groups with different trophic  
607 functionality can be differently interpreted. In case most KH in this study are characterized by rapid  
608 sedimentation rates, the sediment eDNA reflects the response of the KH communities to the agriculture  
609 intensification in the area since the 1950s (Sommer et al. 2008). In contrast, a slow sedimentation rate  
610 would mean sediments still include periods when low-input agriculture was the main practice in the area.  
611 However, several facts point to fast sedimentation as the more likely scenario. First, land-use in the area  
612 likely changed considerably over the last centuries (Kaplan et al. 2009, Nicolay et al. 2014). Second, only  
613 low-input agriculture was practiced in the area prior to the 1950s (Bauerkämper 2004, Sommer et al.  
614 2008). Last, many of the taxa resulting in differences between the sediment and water are primary

615 producers, conceivably responding to increased inputs of agrochemicals, notably P and N from  
616 agriculture (Table 1). Therefore, the sediment eDNA could well reflect community changes triggered by  
617 intensified agriculture. The separate clustering of eukaryotic phytoplankton from the upper and lower  
618 sediment, further suggests a recent change in communities in the last 20-30 years as dated by Kleeberg et  
619 al. (2016). Coupling thin-layer sediment eDNA analysis with sediment dating in a large number of KH  
620 are needed to reinforce this tentative conclusion.

### 621 **Land-use preferences of taxa**

622 Intensive agricultural land use has been shown to result in biotic homogenization, erasing even subtle  
623 patterns resulting from other land-use types within a landscape dominated by arable fields (Smart et al.  
624 2006, Buhk et al. 2017). Indicator species analysis reveals that no single taxon is uniquely associated with  
625 a specific land-use, although some taxa show a higher preference to one or two (out of three) land uses  
626 (Fig. 6A). As expected, based on the above discussion, this analysis also shows a higher number of taxa  
627 in sediment than in water - being associated with a particular land-use type. The lowest number of taxa  
628 that was specifically associated with a single land-use type was assigned to arable fields, whereas forests  
629 harbored the most, followed closely by grassland. This contrast between arable fields vs. forests and  
630 grasslands may suggest that the latter two represent more constant environments. The continuous  
631 mechanical processing (e.g. ploughing and harvesting) of fields results in constant morphological  
632 restructuring of niches and destruction of macro- and micro gradients, possibly influencing littoral  
633 organisms or those moving between the aquatic and terrestrial environments. Crop rotation and  
634 subsequent alteration in the type of agrochemicals may however affect the KH water, driving continuous  
635 changes in the overall community. The quantitative associations of different taxa to specific land-use  
636 types visualized through ternary plots support the results of the indicator species analyses suggesting that  
637 aquatic biodiversity was likely homogenized at the regional level during more than half a century of  
638 intensive agriculture practice, independent of land use immediately adjacent to the KH.

639 Opposite tendencies in sediment and water samples are evident in the community as a whole and the  
640 separately analyzed communities and in the three domains of life (*Bacteria*, *Archaea* and *Eukarya*).  
641 Sediment samples harbored more taxa with a higher affinity towards arable fields, reflecting likely the  
642 archived response to the early days of intensive agriculture in the area. In contrast, taxa in water samples  
643 are more inclined towards forest and grassland, suggesting that despite the overall homogenization, some  
644 taxa may still find refuge in non-arable areas. Interestingly, bacteria and eukaryotes in water samples  
645 exhibit a different pattern. *Bacteria* are more inclined towards grasslands, with *Cyanobacteria* dominating  
646 the grassland-associated taxa, and eukaryotes towards forests, with fungi being the largest group of forest-  
647 associated eukaryotic taxa. These differences probably reflect light availability in grassland and plant  
648 litter inputs in forest KH, respectively.

### 649 **Buffering of land-use effects are likely negligible**

650 Our study shows that none of the organisms detected in water samples is associated with a specific land-  
651 use type. In addition, the community as a whole was not structured by land-use type. One likely  
652 explanation is the ubiquitous and long-lasting eutrophication in our study region resulting from intensive  
653 agricultural practices during the last decades (Lischeid et al. 2018). Indeed, the phosphorus concentration  
654 found in all ponds throughout the study period corresponds to eutrophic to hypertrophic conditions  
655 (Wetzel 2001). Additionally, while some individual chemical parameters did differ among land-use types  
656 (e.g. DOC), the latter does not explain the chemical variability among the KH, indicating a chemical  
657 homogenization effect. Lischeid et al. (2018) showed that KH in the study area are connected via  
658 groundwater. Therefore, the nutrient and mineral concentrations in a given KH may reflect an integral of  
659 the inputs in the area rather than a local chemical signature. These physical and chemical properties of the  
660 water play a major role in shaping aquatic communities. Therefore, the local biota likely reflects the water  
661 it resides in rather than mirrors the surrounding land-use type. Joniak et al. (2007) conducted a large study  
662 on zooplankton and macrophytes covering 165 ponds in Poland situated in a similar environmental setting



663 as our KH, but covering a larger eutrophication gradient. Certain taxonomic groups tended to be  
664 associated with different eutrophication states of the ponds but like in our study, no correlation was found  
665 to land-use type. Vegetated buffer strips at least 5 m in width around the ponds were proposed to  
666 minimize or even eliminate the influences of surrounding land cover, in particular nutrient inputs from  
667 arable fields. In our area, however, the connection of KH via groundwater could have minimized such  
668 buffering effects of surrounding vegetation. This lack of notable land-use influences is consistent with  
669 analyses of other rural ponds in different land-use types (Declerck et al. 2006, Joniak et al. 2007, Pätzig et  
670 al. 2012), this is in contrast to a pronounced land-use effect on ponds found when comparing urban and  
671 rural ponds and lakes (Akasaka et al. 2010, Kraemer et al. 2020).

## 672 **Geographical distribution**

673 Organisms belonging to all domains of life are transferred between KH via different abiotic and biotic  
674 vectors such as wind, insects, mammals and humans. The dense network and long existence of KH in the  
675 region likely presents transfer opportunities to all organisms over time. Choudoir et al. (2017) showed  
676 that dispersal area of bacteria lies in the order of thousands of km<sup>2</sup>. On the other end, species with  
677 elevated loyalty to birth ponds such as amphibians (Smith and Green 2005), who typically do not wander  
678 further than a few hundred meters from “home”, will encounter new ponds within this range due to the  
679 high density of KH in the area. Nevertheless, once these organisms arrive at a new location, they may be  
680 unsuccessful in establishing a new local population and are therefore eradicated or remain extremely low  
681 in abundance or dormant state until an opportunity arises for them to multiply (Ionescu et al., 2014). This  
682 may be the case for most bacteria and both unicellular and some multicellular eukaryotes. This explains  
683 how in a landscape with homogenized biodiversity where generally “everything is everywhere”, the  
684 difference among KH communities is not in par with geographical distance.

## 685 **Conclusions**

686 We demonstrate that broad-scale eDNA analyses can serve to identify specific taxonomic groups that may  
687 be influenced by land-use change or land management. Such groups can be subsequently investigated in  
688 detail through targeted studies at high taxonomic resolution using additional or alternative genetic  
689 markers. The enhanced sensitivity of sequence frequencies as opposed to presence/absence data to detect  
690 land-use effects on biodiversity in water or sediment suggests that while species composition may not be  
691 influenced by land-use, their ability to establish identical populations everywhere may exist. Accordingly,  
692 following low-cost, deep sequencing broad eDNA surveys, quantitative studies should be employed to  
693 investigate specific conservation-prone taxa.

694 Our analysis of water and sediment eDNA resulted in opposing magnitudes of the effect of land-use type  
695 on the biodiversity of KH in an agricultural landscape. We propose that the higher land-use effect,  
696 noticeable in the deeper sediment data for the total community and specific taxonomic groups, likely  
697 reflects more than half a century of intensive agriculture. Sediment eDNA data reveals a response in the  
698 abundance of primary producers and planktonic consumers, possibly caused by the continuous  
699 eutrophication of KH as reflected in KH water chemistry today. This eutrophication process archived in  
700 the sediment could have led to the homogenization of biodiversity across the entire study area, resulting  
701 in a low detectable land-use effect on biodiversity patterns in the water samples, which represent the  
702 current situation. This broad-scale homogenization effect on aquatic biodiversity could have been  
703 reinforced by KH connectivity below and above ground. Below ground, groundwater can propagate  
704 effects of one land-use type such as arable fields to KH located elsewhere. Above ground, the dense  
705 network of KH facilitates tight coupling through active and passive species dispersal.

706 Our eDNA approach, capturing all taxa across the three domains of life are consistent with previous  
707 studies focusing on specific groups. Most KH included in those studies are located in areas with a long  
708 history of industrialized agriculture. Although the small size of KH implies a strong influence of the  
709 surroundings, we propose that the lack of pronounced land-use effects results from the homogenization,  
710 and possibly loss, of KH biodiversity during a long period of intensive agriculture and the concomitant

711 KH eutrophication. Interestingly, similar to our results on KH, some recent lake studies also show  
712 minimal effects of land-use type (Abell et al. 2011, Catherine et al. 2016, Marmen et al. 2020).

713 This conclusion emphasizes the intricacies of aquatic biodiversity conservation in landscapes dominated  
714 by agriculture. In a broad survey summarizing the results of different conservation practices, Gonthier et  
715 al. (2014) conclude that the combination of decreased management intensity (i.e. less agrochemicals)  
716 coupled with increases in landscape complexity around arable fields and farms, is most suitable to prevent  
717 species loss. However, the effects of such measures in areas where biodiversity has been already  
718 homogenized over half a century is still unclear.

719

## 720 **Acknowledgments**

721 We thank the farmers and landowners in the study area for their collaboration and making the sampled  
722 KH accessible. We also thank the Landwirtschaft- und Umweltamt - Landkreis Uckermark for assistance  
723 and support in sampling the forest KH in the Kiecker Nature reserve, and Dr. Günter Heise for  
724 accompanying us. Further thanks are due to Dr. Masahiro Ryo for analysis of spatial autocorrelation  
725 analyses, and to Mr. Gonzalo Idoate Santaolalla, Dr. Jason Woodhouse, Dr. Luca Zoccarato, Mr. Darshan  
726 Neubauer, Mr. Alberto Villalba, Mr. Justin Stranz and Mr. Ignacio Rodanes Ajamil for sampling  
727 assistance. This study was funded by the German Federal Ministry of Education and Research (BMBF)  
728 within the Collaborative Project “Bridging in Biodiversity Science - BIBS” (funding number 01LC1501).  
729 M. Bizic was additionally funded through the DFG Eigene Stelle project (BI 1987/2-1). All  
730 responsibilities for the content of this publication are assumed by the authors.

731 *# This paper has been revised since this version but is still under review and therefore cannot be updated.*  
732 *This original version aims to allow access to the data and discussions presented in: Bizic et al., 2022,*  
733 *Land-use type temporarily affects active pond community structure but not gene expression patterns.*  
734 *Molecular ecology* <https://doi.org/10.1111/mec.16348>

735

## 736 **References**

- 737 Abell, J. M., D. Özkundakci, D. P. Hamilton, and S. D. Miller. 2011. Relationships between land use and  
738 nitrogen and phosphorus in New Zealand lakes. *Marine and Freshwater Research* 62:162.
- 739 Akasaka, M., N. Takamura, H. Mitsuhashi, and Y. Kadono. 2010. Effects of land use on aquatic  
740 macrophyte diversity and water quality of ponds. *Freshwater Biology* 55:909–922.
- 741 Altenfelder, S., U. Raabe, and H. Albrecht. 2014. Effects of water regime and agricultural land use on  
742 diversity and species composition of vascular plants inhabiting temporary ponds in northeastern  
743 Germany. *Tuexenia* 34:145–162.
- 744 Andújar, C., P. Arribas, D. W. Yu, A. P. Vogler, and B. C. Emerson. 2018. Why the COI barcode should  
745 be the community DNA metabarcode for the metazoa. *Molecular Ecology* 27:3968–3975.
- 746 Attermeyer, K., H. P. Grossart, S. Flury, and K. Premke. 2017. Bacterial processes and biogeochemical  
747 changes in the water body of kettle holes - mainly driven by autochthonous organic matter? *Aquatic*  
748 *Sciences* 79:675–687.
- 749 Baessler, C., and S. Klotz. 2006. Effects of changes in agricultural land-use on landscape structure and  
750 arable weed vegetation over the last 50 years. *Agriculture, Ecosystems & Environment* 115:43–50.
- 751 Bálint, M., O. Márton, M. Schatz, R. A. Düring, and H. P. Grossart. 2018. Proper experimental design  
752 requires randomization/balancing of molecular ecology experiments. *Ecology and Evolution*  
753 8:1786–1793.
- 754 Bauerkämper, A. 2004. The industrialization of agriculture and its consequences for the natural

- 755 environment: an inter-German comparative perspective. *Historical Social Research* 29:124–149.
- 756 Beng, K. C., and R. T. Corlett. 2020, June 1. Applications of environmental DNA (eDNA) in ecology and  
757 conservation: opportunities, challenges and prospects. Springer.
- 758 Berger, G., F. Graef, B. Pallut, J. Hoffmann, C. A. Brühl, and N. Wagner. 2018. How Does Changing  
759 Pesticide Usage Over Time Affect Migrating Amphibians: A Case Study on the Use of Glyphosate-  
760 Based Herbicides in German Agriculture Over 20 Years. *Frontiers in Environmental Science* 6.
- 761 Berger, G., F. Graef, and H. Pfeffer. 2013. Glyphosate applications on arable fields considerably coincide  
762 with migrating amphibians. *Scientific Reports* 3:2622.
- 763 Berger, G., H. Pfeffer, and T. Kalettka. 2011. Amphibienschutz in kleingewässerreichen  
764 Ackerbaugebieten (Conservation of amphibians in pond rich arable landscapes).
- 765 Bižić-Ionescu, M., M. Zeder, D. Ionescu, S. Orlić, B. M. Fuchs, H.-P. P. Grossart, and R. Amann. 2015.  
766 Comparison of bacterial communities on limnic versus coastal marine particles reveals profound  
767 differences in colonization. *Environmental microbiology* 17:3500–3514.
- 768 Buhk, C., M. Alt, M. J. Steinbauer, C. Beierkuhnlein, S. D. Warren, and A. Jentsch. 2017. Homogenizing  
769 and diversifying effects of intensive agricultural land-use on plant species beta diversity in Central  
770 Europe — A call to adapt our conservation measures. *Science of the Total Environment* 576:225–  
771 233.
- 772 Bylemans, J., D. M. Gleeson, R. P. Duncan, C. M. Hardy, and E. M. Furlan. 2019. A performance  
773 evaluation of targeted eDNA and eDNA metabarcoding analyses for freshwater fishes.  
774 *Environmental DNA* 1:402–414.
- 775 Cáceres, M. De, and P. Legendre. 2009. Associations between species and groups of sites: indices and  
776 statistical inference. *Ecology* 90:3566–3574.
- 777 Catherine, A., M. Selma, D. Mouillot, M. Troussellier, and C. Bernard. 2016. Patterns and multi-scale  
778 drivers of phytoplankton species richness in temperate peri-urban lakes. *Science of the Total  
779 Environment* 559:74–83.
- 780 Choudoir, M. J., A. Barber An, H. L. Menninger, R. R. Dunn, and N. Fierer. 2017. Variation in range size  
781 and dispersal capabilities of microbial taxa.
- 782 Chytrý, M., L. Tichý, J. Holt, and Z. Botta-Dukát. 2002. Determination of diagnostic species with  
783 statistical fidelity measures. *Journal of Vegetation Science* 13:79–90.
- 784 Declerck, S., T. De Bie, D. Ercken, H. Hampel, S. Schrijvers, J. Van Wichelen, V. Gillard, R. Mandiki,  
785 B. Losson, D. Bauwens, S. Keijers, W. Vyverman, B. Goddeeris, L. De meester, L. Brendonck, and  
786 K. Martens. 2006. Ecological characteristics of small farmland ponds: Associations with land use  
787 practices at multiple spatial scales. *Biological Conservation* 131:523–532.
- 788 Deiner, K., H. M. Bik, E. Mächler, M. Seymour, A. Lacoursière-Roussel, F. Altermatt, S. Creer, I. Bista,  
789 D. M. Lodge, N. Vere, M. E. Pfrender, and L. Bernatchez. 2017. Environmental DNA  
790 metabarcoding: Transforming how we survey animal and plant communities. *Molecular Ecology*  
791 26:5872–5895.
- 792 Dethlefsen, L., S. Huse, M. L. Sogin, and D. A. Relman. 2008. The pervasive effects of an antibiotic on  
793 the human gut microbiota, as revealed by deep 16s rRNA sequencing. *PLoS Biology* 6:2383–2400.
- 794 Donald, P. F., F. J. Sanderson, I. J. Burfield, and F. P. J. van Bommel. 2006. Further evidence of  
795 continent-wide impacts of agricultural intensification on European farmland birds, 1990–2000.  
796 *Agriculture, Ecosystems & Environment* 116:189–196.
- 797 Downing, J. A., Y. T. Prairie, J. J. Cole, C. M. Duarte, L. J. Tranvik, R. G. Striegl, W. H. McDowell, P.

- 798 Kortelainen, N. F. Caraco, J. M. Melack, and J. J. Middelburg. 2006. The global abundance and size  
799 distribution of lakes, ponds, and impoundments. *Limnology and Oceanography* 51:2388–2397.
- 800 Emilson, C. E., D. G. Thompson, L. A. Venier, T. M. Porter, T. Swystun, D. Chartrand, S. Capell, and M.  
801 Hajibabaei. 2017. DNA metabarcoding and morphological macroinvertebrate metrics reveal the  
802 same changes in boreal watersheds across an environmental gradient. *Scientific Reports* 7:1–11.
- 803 Fasching, C., C. Akotoye, M. Bižić, J. Fonvielle, D. Ionescu, S. Mathavarajah, L. Zoccarato, D. A.  
804 Walsh, H. Grossart, and M. A. Xenopoulos. 2020. Linking stream microbial community functional  
805 genes to dissolved organic matter and inorganic nutrients. *Limnology and Oceanography* 65:S71–  
806 S87.
- 807 Fernández, S., S. Rodríguez, J. L. Martínez, Y. J. Borrell, A. Ardura, and E. García-Vázquez. 2018.  
808 Evaluating freshwater macroinvertebrates from eDNA metabarcoding: A river Nalón case study.  
809 *PLOS ONE* 13:e0201741.
- 810 Fischer, M. A., S. Güllert, S. C. Neulinger, W. R. Streit, and R. A. Schmitz. 2016. Evaluation of 16S  
811 rRNA Gene Primer Pairs for Monitoring Microbial Community Structures Showed High  
812 Reproducibility within and Low Comparability between Datasets Generated with Multiple Archaeal  
813 and Bacterial Primer Pairs. *Frontiers in Microbiology* 7.
- 814 Frielinghaus, M., and W. G. Vahrson. 1998. Soil translocation by water erosion from agricultural  
815 cropland into wet depressions (morainic kettle holes). Pages 23–30 *Soil and Tillage Research*.  
816 Elsevier B.V.
- 817 Van Geest, G. J., F. C. J. M. Roozen, H. Coops, R. M. M. Roijackers, A. D. Buijse, E. T. H. M. Peeters,  
818 and M. Scheffer. 2003. Vegetation abundance in lowland flood plan lakes determined by surface  
819 area, age and connectivity. *Freshwater Biology* 48:440–454.
- 820 Gonthier, D. J., K. K. Ennis, S. Farinas, H.-Y. Hsieh, A. L. Iverson, P. Batáry, J. Rudolphi, T. Tschardtke,  
821 B. J. Cardinale, and I. Perfecto. 2014. Biodiversity conservation in agriculture requires a multi-scale  
822 approach. *Proceedings of the Royal Society B: Biological Sciences* 281:20141358.
- 823 Gruber-Vodicka, H. R., B. K. Seah, and E. Pruesse. 2019. phyloFlash — Rapid SSU rRNA profiling and  
824 targeted assembly from metagenomes. *bioRxiv*:521922.
- 825 Hamilton, N. E., and M. Ferry. 2018. Ggtern: Ternary diagrams using ggplot2. *Journal of Statistical*  
826 *Software* 87:1–17.
- 827 Hammer, Ø., D. Harper, and P. D. Ryan. 2009. PAST: Paleontological Statistics Software Package for  
828 Education and Data Analysis. 2001. *Palaeontol Electronica* 4:1–9.
- 829 Hardy, C. M., E. S. Krull, D. M. Hartley, and R. L. Oliver. 2010. Carbon source accounting for fish using  
830 combined DNA and stable isotope analyses in a regulated lowland river weir pool. *Molecular*  
831 *Ecology* 19:197–212.
- 832 Harper, L. R., A. S. Buxton, H. C. Rees, K. Bruce, R. Brys, D. Halfmaerten, D. S. Read, H. V. Watson, C.  
833 D. Sayer, E. P. Jones, V. Priestley, E. Mächler, C. Múrria, S. Garcés-Pastor, C. Medupin, K.  
834 Burgess, G. Benson, N. Boonham, R. A. Griffiths, L. Lawson Handley, and B. Hänfling. 2019,  
835 January 1. Prospects and challenges of environmental DNA (eDNA) monitoring in freshwater  
836 ponds. Springer International Publishing.
- 837 Harrison, J. B., J. M. Sunday, and S. M. Rogers. 2019, November 20. Predicting the fate of eDNA in the  
838 environment and implications for studying biodiversity. Royal Society Publishing.
- 839 Heim, O., J. Lenski, J. Schulze, K. Jung, S. Kramer-Schadt, J. A. Eccard, and C. C. Voigt. 2018. The  
840 relevance of vegetation structures and small water bodies for bats foraging above farmland. *Basic*  
841 *and Applied Ecology* 27:9–19.

- 842 Huber, J. A., D. B. Mark Welch, H. G. Morrison, S. M. Huse, P. R. Neal, D. A. Butterfield, and M. L.  
843 Sogin. 2007. Microbial population structures in the deep marine biosphere. *Science* 318:97–100.
- 844 Ionescu, D., C. Siebert, L. Polerecky, Y. Y. Munwes, C. Lott, S. Häusler, M. Bižić-Ionescu, C. Quast, J.  
845 Peplies, F. O. Glöckner, A. Ramette, T. Rödiger, T. Dittmar, A. Oren, S. Geyer, H.-J. Stärk, M.  
846 Sauter, T. Licha, J. B. Laronne, and D. de Beer. 2012. Microbial and Chemical Characterization of  
847 Underwater Fresh Water Springs in the Dead Sea. *PLoS ONE* 7:e38319.
- 848 Joniak, T., N. Kuczyńska-Kippen, and B. Nagengast. 2007. The role of aquatic macrophytes in  
849 microhabitat transformation of physical-chemical features of small water bodies. Pages 101–109  
850 *Hydrobiologia*.
- 851 Kalettka, T., and C. Rudat. 2006. Hydrogeomorphic types of glacially created kettle holes in North-East  
852 Germany. *Limnologica* 36:54–64.
- 853 Kaplan, J. O., K. M. Krumhardt, and N. Zimmermann. 2009. The prehistoric and preindustrial  
854 deforestation of Europe. *Quaternary Science Reviews* 28:3016–3034.
- 855 Karasiewicz, M. T., P. Hulisz, A. M. Noryśkiewicz, I. Krześlak, and M. Świtoniak. 2014. The record of  
856 hydroclimatic changes in the sediments of a kettle-hole in a young glacial landscape (north-central  
857 Poland). *Quaternary International* 328–329:264–276.
- 858 Kayler, Z. E., M. Badrian, A. Frackowski, H. Rieckh, K. N. Nitzsche, T. Kalettka, C. Merz, and A.  
859 Gessler. 2018. Ephemeral kettle hole water and sediment temporal and spatial dynamics within an  
860 agricultural catchment. *Ecohydrology* 11:e1929.
- 861 Kayler, Z. E., K. Premke, A. Gessler, M. O. Gessner, C. Griebler, S. Hilt, L. Klemetsson, Y. Kuzyakov,  
862 M. Reichstein, J. Siemens, K. U. Totsche, L. Tranvik, A. Wagner, M. Weitere, and H. P. Grossart.  
863 2019. Integrating aquatic and terrestrial perspectives to improve insights into organic matter cycling  
864 at the landscape scale. *Frontiers in Earth Science* 7:127.
- 865 Khan, F. A., and A. A. Ansari. 2005. Eutrophication: An ecological vision. *The Botanical Review* 2005  
866 71:4 71:449–482.
- 867 Kim, D. K., K. Park, H. Jo, and I. S. Kwak. 2019. Comparison of water sampling between environmental  
868 DNA metabarcoding and conventional microscopic identification: A case study in Gwangyang Bay,  
869 South Korea. *Applied Sciences (Switzerland)* 9:3272.
- 870 Kleeberg, A., M. Neyen, U. K. Schkade, T. Kalettka, and G. Lischeid. 2016. Sediment cores from kettle  
871 holes in NE Germany reveal recent impacts of agriculture. *Environmental Science and Pollution*  
872 *Research* 23:7409–7424.
- 873 Kraemer, S. A., N. Barbosa da Costa, B. J. Shapiro, M. Fradette, Y. Huot, and D. A. Walsh. 2020. A  
874 large-scale assessment of lakes reveals a pervasive signal of land use on bacterial communities.  
875 *ISME Journal*:1–13.
- 876 Leibold, M. A., M. Holyoak, N. Mouquet, P. Amarasekare, J. M. Chase, M. F. Hoopes, R. D. Holt, J. B.  
877 Shurin, R. Law, D. Tilman, M. Loreau, and A. Gonzalez. 2004, July. The metacommunity concept:  
878 A framework for multi-scale community ecology.
- 879 Lischeid, G., and T. Kalettka. 2012. Grasping the heterogeneity of kettle hole water quality in Northeast  
880 Germany. *Hydrobiologia* 689:63–77.
- 881 Lischeid, G., T. Kalettka, M. Holländer, J. Steidl, C. Merz, R. Dannowski, T. Hohenbrink, C. Lehr, G.  
882 Onandia, F. Reverey, and M. Pätzig. 2018. Natural ponds in an agricultural landscape: External  
883 drivers, internal processes, and the role of the terrestrial-aquatic interface. *Limnologica* 68:5–16.
- 884 Macdonald, D. ., and P. . Johnson. 2000. Farmers and the custody of the countryside: trends in loss and  
885 conservation of non-productive habitats 1981–1998. *Biological Conservation* 94:221–234.



- 886 Marmen, S., L. Blank, A. Al-Ashhab, A. Malik, L. Ganzert, M. Lalar, H.-P. Grossart, and D. Sher. 2020.  
887 The Role of Land Use Types and Water Chemical Properties in Structuring the Microbiomes of a  
888 Connected Lake System. *Frontiers in Microbiology* 11:89.
- 889 Meij, W. M., T. Reimann, V. K. Vornehm, A. J. A. M. Temme, J. Wallinga, R. Beek, and M. Sommer.  
890 2019. Reconstructing rates and patterns of colluvial soil redistribution in agrarian (hummocky)  
891 landscapes. *Earth Surface Processes and Landforms* 44:2408–2422.
- 892 Meyer, S., K. Wesche, B. Krause, and C. Leuschner. 2013. Dramatic losses of specialist arable plants in  
893 Central Germany since the 1950s/60s - a cross-regional analysis. *Diversity and Distributions*  
894 19:1175–1187.
- 895 Nicolay, A., A. Raab, T. Raab, H. Rösler, E. Bönisch, and A. S. Murray. 2014. Evidence of (Pre-) historic  
896 to modern landscape and land use history near jänschwalde (Brandenburg, Germany). *Zeitschrift für*  
897 *Geomorphologie* 58:007–031.
- 898 Nitsch, H., B. Osterburg, W. Roggendorf, and B. Laggner. 2012. Cross compliance and the protection of  
899 grassland - Illustrative analyses of land use transitions between permanent grassland and arable land  
900 in German regions. *Land Use Policy* 29:440–448.
- 901 Nitzsche, K. N., T. Kalettka, K. Premke, G. Lischeid, A. Gessler, and Z. E. Kayler. 2017. Land-use and  
902 hydroperiod affect kettle hole sediment carbon and nitrogen biogeochemistry. *Science of the Total*  
903 *Environment* 574:46–56.
- 904 Novikmec, M., L. Hamerlík, D. Kočický, R. Hrivnák, J. Kochjarová, H. O’ahel’ová, P. Paľove-Balang,  
905 and M. Svitok. 2016. Ponds and their catchments: size relationships and influence of land use across  
906 multiple spatial scales. *Hydrobiologia* 774:155–166.
- 907 Oksanen, J., B. F. Guillaume, R. Kindt, P. Legendre, P. Minchin, R. O’Hara, G. Simpson, P. Solymos, M.  
908 Stevens, and H. Wagner. 2006. *Vegan: community ecology package*. R package version 2.0-4. cran.  
909 [r-project.org/](http://r-project.org/).
- 910 Pätzig, M., T. Kalettka, M. Glemnitz, and G. Berger. 2012. What governs macrophyte species richness in  
911 kettle hole types? A case study from Northeast Germany. *Limnologia* 42:340–354.
- 912 Pérez-Lucas, G., N. Vela, A. El Aatik, and S. Navarro. 2019. Environmental Risk of Groundwater  
913 Pollution by Pesticide Leaching through the Soil Profile. Page Pesticides - Use and Misuse and  
914 Their Impact in the Environment. IntechOpen.
- 915 Platen, R., T. Kalettka, and C. Ulrichs. 2016. Kettle holes in the agrarian landscape: Isolated and  
916 ecological unique habitats for carabid beetles (col.: Carabidae) and spiders (arach.: Araneae).  
917 *Journal of Landscape Ecology(Czech Republic)* 9:29–30.
- 918 Premke, K., K. Attermeyer, J. Augustin, A. Cabezas, P. Casper, D. Deumlich, J. Gelbrecht, H. H. Gerke,  
919 A. Gessler, H.-P. Grossart, S. Hilt, M. Hupfer, T. Kalettka, Z. Kayler, G. Lischeid, M. Sommer, and  
920 D. Zak. 2016. The importance of landscape diversity for carbon fluxes at the landscape level: small-  
921 scale heterogeneity matters. *Wiley Interdisciplinary Reviews: Water* 3:601–617.
- 922 Roussel, J.-M., J.-M. Paillisson, A. Tréguier, and E. Petit. 2015. The downside of eDNA as a survey tool  
923 in water bodies. *Journal of Applied Ecology* 52:823–826.
- 924 Sakata, M. K., S. Yamamoto, R. O. Gotoh, M. Miya, H. Yamanaka, and T. Minamoto. 2020. Sedimentary  
925 eDNA provides different information on timescale and fish species composition compared with  
926 aqueous eDNA. *Environmental DNA:edn3.75*.
- 927 Scheffer, M., G. J. Van Geest, K. Zimmer, E. Jeppesen, M. Søndergaard, M. G. Butler, M. A. Hanson, S.  
928 Declerck, and L. De Meester. 2006, January. Small habitat size and isolation can promote species  
929 richness: Second-order effects on biodiversity in shallow lakes and ponds.

- 930 Schöler, A., S. Jacquioid, G. Vestergaard, S. Schulz, and M. Schloter. 2017, July 1. Analysis of soil  
931 microbial communities based on amplicon sequencing of marker genes. Springer Verlag.
- 932 Serrano, L., M. Reina, X. D. Quintana, S. Romo, C. Olmo, J. M. Soria, S. Blanco, C. Fernández-Aláez,  
933 M. Fernández-Aláez, M. C. Caria, S. Bagella, T. Kalettka, and M. Pätzig. 2017. A new tool for the  
934 assessment of severe anthropogenic eutrophication in small shallow water bodies. *Ecological*  
935 *Indicators* 76:324–334.
- 936 Smart, S. M., K. Thompson, R. H. Marrs, M. G. Le Duc, L. C. Maskell, and L. G. Firbank. 2006. Biotic  
937 homogenization and changes in species diversity across human-modified ecosystems. *Proceedings*  
938 *of the Royal Society B: Biological Sciences* 273:2659–2665.
- 939 Smith, M. A., and D. M. Green. 2005, February 1. Dispersal and the metapopulation paradigm in  
940 amphibian ecology and conservation: Are all amphibian populations metapopulations? John Wiley  
941 & Sons, Ltd.
- 942 Sommer, M., H. H. Gerke, and D. Deumlich. 2008. Modelling soil landscape genesis - A “time split”  
943 approach for hummocky agricultural landscapes. *Geoderma* 145:480–493.
- 944 Søndergaard, M., E. Jeppesen, and J. P. Jensen. 2005. Pond or lake: does it make any difference? *Archiv*  
945 *für Hydrobiologie* 162:143–165.
- 946 The R Core Team. 2018. R: A Language and Environment for Statistical Computing. The R Core Team.
- 947 Thijs, S., M. O. De Beeck, B. Beckers, S. Truyens, V. Stevens, J. D. Van Hamme, N. Weyens, and J.  
948 Vangronsveld. 2017. Comparative evaluation of four bacteria-specific primer pairs for 16S rRNA  
949 gene surveys. *Frontiers in Microbiology* 8.
- 950 Wetzel, R. G. 2001. *Limnology: Lake and River ecosystems*. 3rd edition. Elsevier.
- 951 Wilson, D. S. 1992. Complex Interactions in Metacommunities, with Implications for Biodiversity and  
952 Higher Levels of Selection. *Ecology* 73:1984–2000.
- 953 Wilson, J. D., A. J. Morris, B. E. Arroyo, S. C. Clark, and R. B. Bradbury. 1999. A review of the  
954 abundance and diversity of invertebrate and plant foods of granivorous birds in northern Europe in  
955 relation to agricultural change. *Agriculture, Ecosystems & Environment* 75:13–30.
- 956 Wood, D. E., J. Lu, and B. Langmead. 2019. Improved metagenomic analysis with Kraken 2. *Genome*  
957 *Biology* 20:257.
- 958 Yang, J., and X. Zhang. 2020. eDNA metabarcoding in zooplankton improves the ecological status  
959 assessment of aquatic ecosystems. *Environment International* 134:105230.
- 960
