# Supplementary material for: From microbes to mammals: pond biodiversity homogenization across different land-use types in an agricultural landscape
Source: bioRxiv or medRxiv preprint supplement (doi:10.1101/2022.01.28.477988), 2022-01-28
Supplement: Supplementary file [file media-1.pdf]

6 **Supplementary Figures**

7

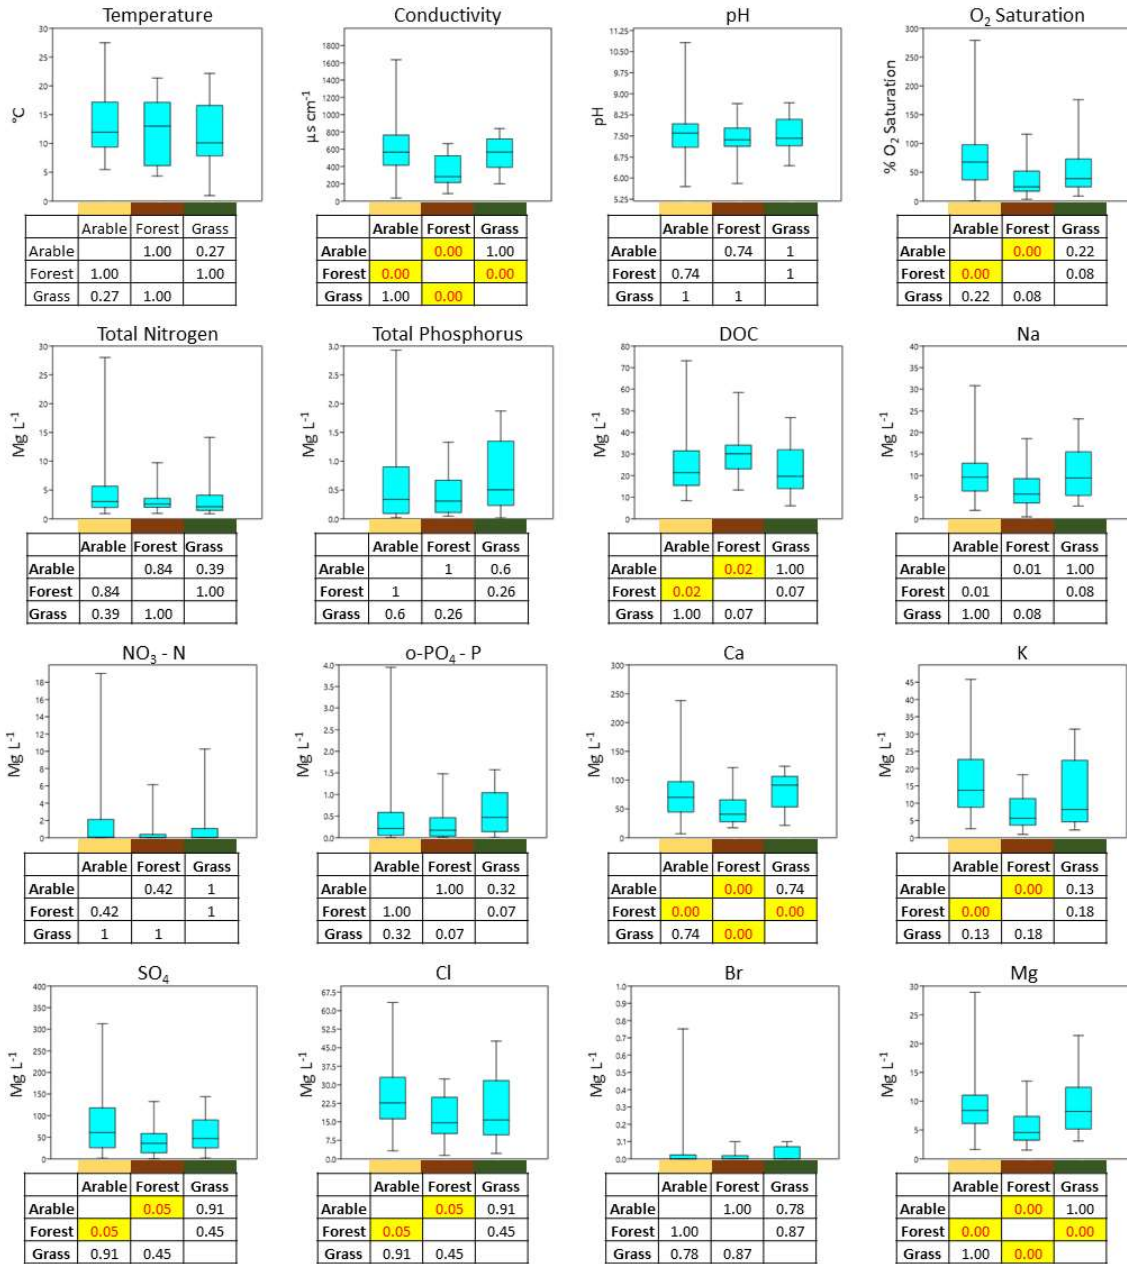

8

9 **Figure S1.** Distribution of environmental parameters across the different land uses summed up  
 10 across all the sampling campaigns. Mustard, brown, and green colors represent arable fields, forests,  
 11 and grassland, respectively. Significant differences between groups of samples according to the  
 12 Mann-Whitney test and Bonferroni-corrected p-values are highlighted in yellow in the interaction  
 13 matrix under each panel. P-values lower than 0.01 appear as 0.00.

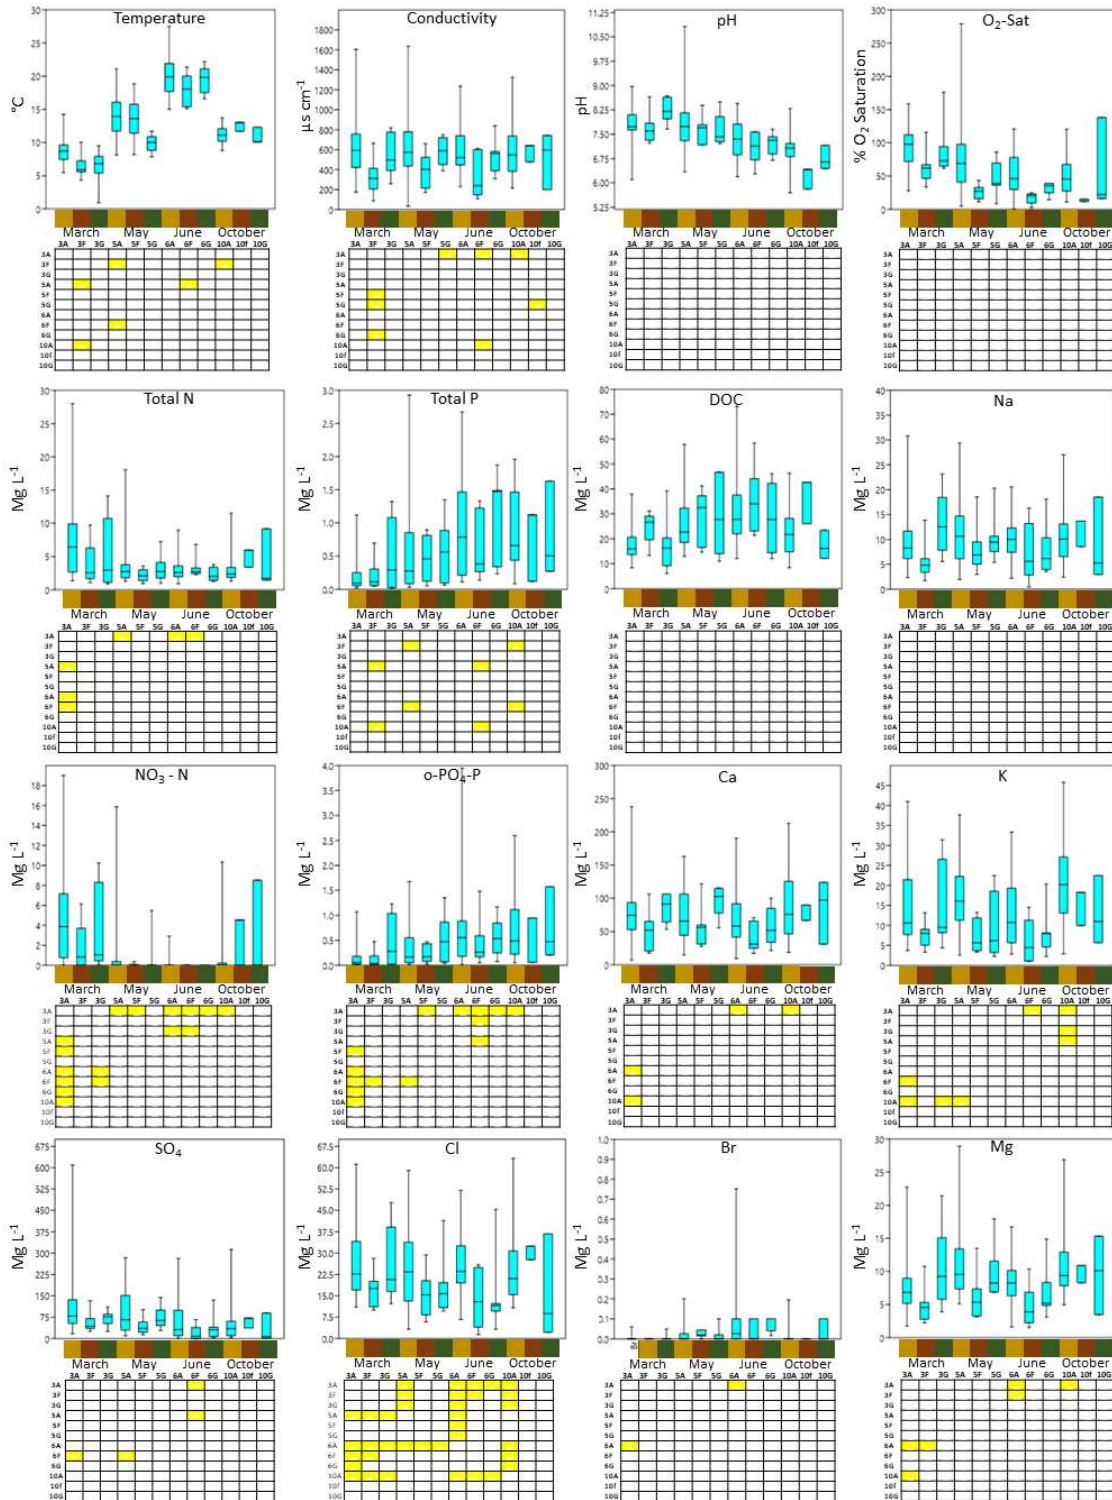

16 **Figure S2.** Distribution of environmental parameters across the different sampling campaigns and  
 17 land uses. Mustard, brown, and green colors represent arable fields, forests, and grassland,  
 18 respectively. Significant differences between groups of samples according to the Mann-Whitney test  
 19 and Bonferroni-corrected p-values are highlighted in yellow in the interaction matrix under each  
 20 panel.

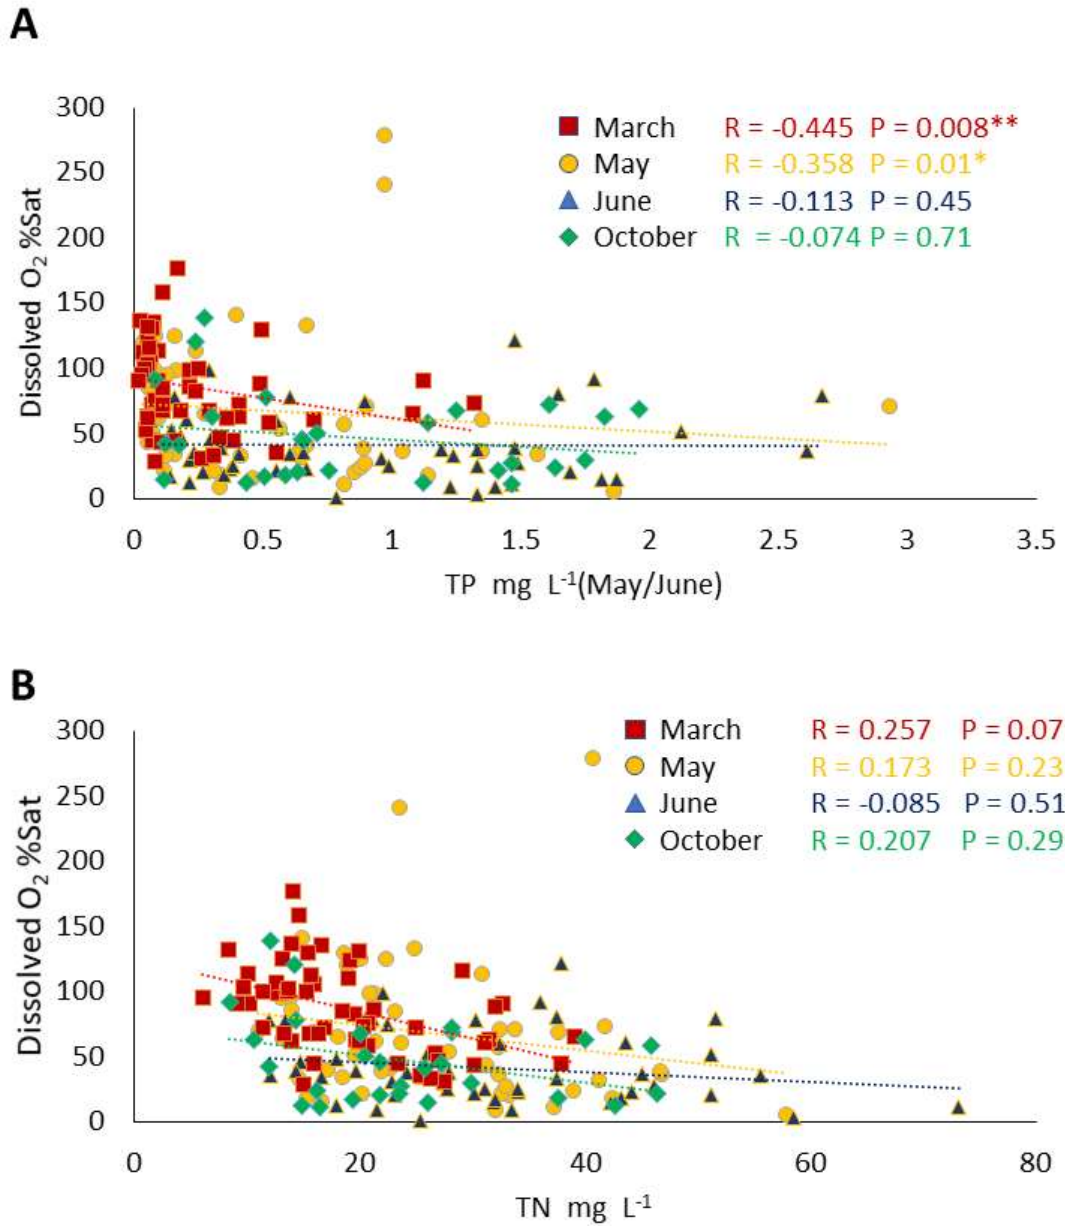

21

22 **Figure S3.** Oxygen saturation vs. total phosphorus (A) and total nitrogen (B) from different KH and  
 23 the different campaigns. Spearman correlation factor (R) and correlation significance are shown in  
 24 the legend of each plot. A significant decrease in oxygen saturation with increasing nutrients could  
 25 be indicative of eutrophication.

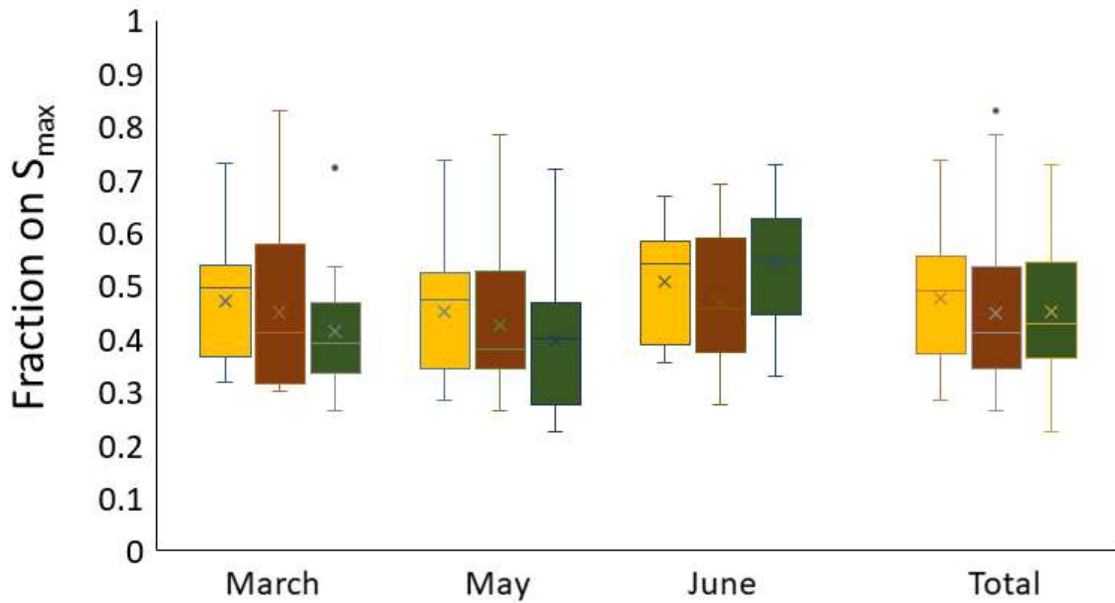

26

27 **Figure S4.** Averaged fraction of accumulated species per land use type for each campaign or in total  
 28 considering the first 6 sites. The fraction was calculated out of the maximum number of species per  
 29 campaign for the different functional groups detailed in Table 1. No statistically significant different  
 30 was seen between the different land-use types suggesting that the larger number of taxa detected in  
 31 arable fields (Fig. 4) is a result of a larger sampling effort (i.e. more sampled KH).

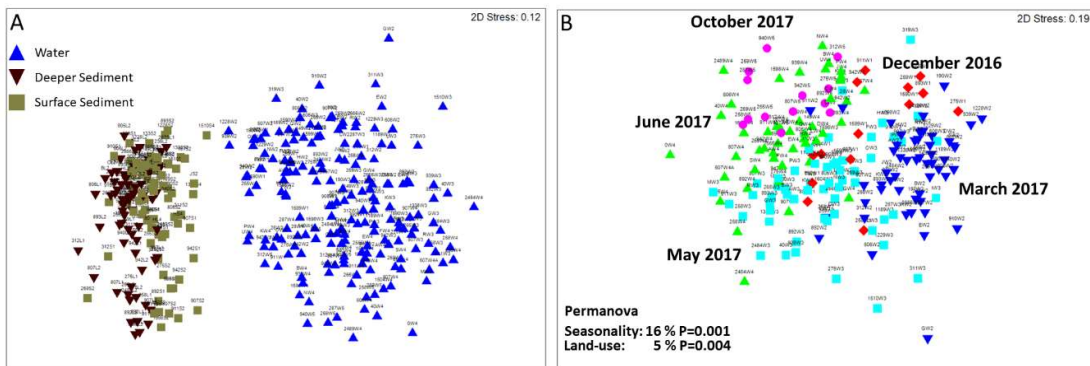

32

33 **Figure S5.** NMDS analysis of bacterial and archaeal community from sediment and water samples (A)  
 34 or just water samples (B) calculated using Bray Curtis similarity and accounting for sequence  
 35 frequency as a proxy for taxa abundance.

36

37

38

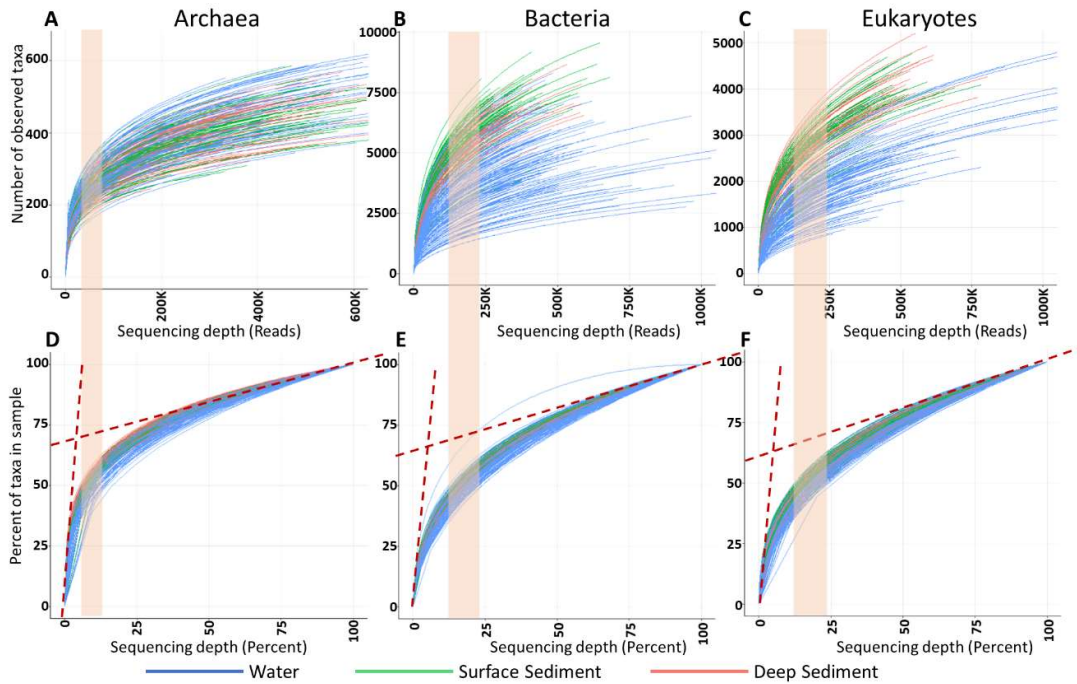

39

40 **Figure S6.** General rarefaction curves for *Archaea*, *Bacteria* and eukaryotes calculated for all samples  
 41 (A-C) alongside the same data normalized to the maximum number of sequences and taxa available  
 42 in each sample (D-E). The percent/number of sequences needed to discover 50 % of the taxa is  
 43 highlighted by the colored bar. The triangle enclosed between the two dashed asymptotic lines and  
 44 the rarefaction curves, show the region in which the number of taxa discovered by increased  
 45 sequencing significantly decreases.

46

47

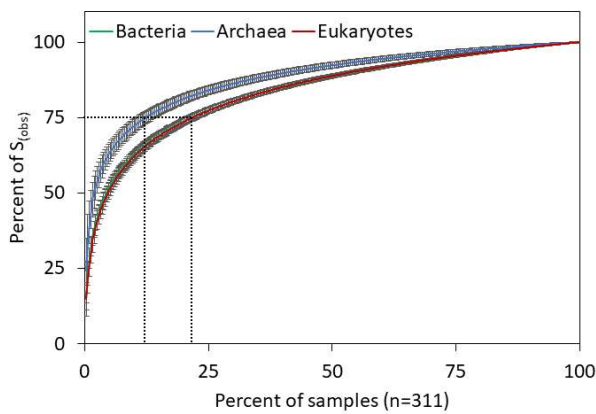

48

49 **Figure S7.** Species accumulation curve for *Archaea*, *Bacteria* and Eukaryotes showing that over 75 %  
 50 of the taxa identified are found in the first 25 % of the samples (< 77 samples).

51

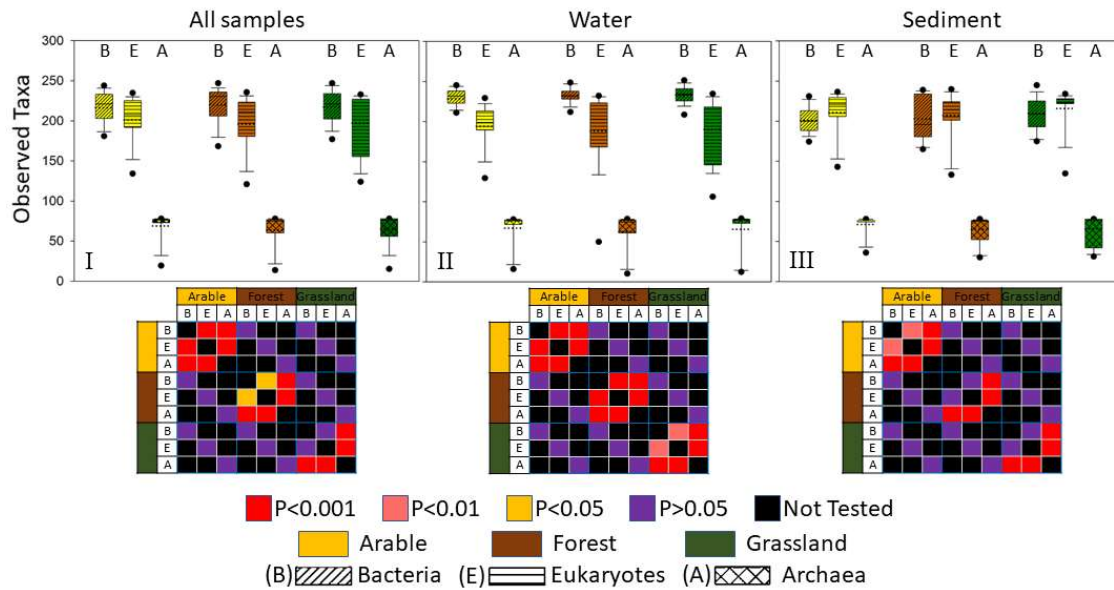

52

53 **Figure S8.** Taxonomic richness of the different domains of life, *Bacteria* (B), Eukaryotes (E) and  
 54 *Archaea* (A) separated into the three types of studied land-uses (Arable, Forest, Grassland) for all  
 55 samples (I), water samples (II) and sediment samples (III). The significance of differences between  
 56 different sample groups was tested by ANOVA on Ranks and significant results are marked in the  
 57 matrices below each panel. Cross land-use-type differences were tested per domain. Cross domain-  
 58 cross land-use type (i.e. *Bacteria* in arable fields vs. Eukaryotes in forests, were not tested).

59

60

61
