# Supplementary material for: From microbes to mammals: pond biodiversity homogenization across different land-use types in an agricultural landscape
Source: bioRxiv or medRxiv preprint supplement (doi:10.1101/2022.01.28.477988), 2022-01-28
Supplement: Supplementary file [file media-3.pdf]

| #KH  | Coordinates |           | Water Collection |         |         |         |         | Sediment collection |         |         |         |         | In-Situ parameters |         |         |         |         | Water chemistry |         |         |         |         | Crops     |           | Landuse   |
|------|-------------|-----------|------------------|---------|---------|---------|---------|---------------------|---------|---------|---------|---------|--------------------|---------|---------|---------|---------|-----------------|---------|---------|---------|---------|-----------|-----------|-----------|
|      | Lat         | Long      | Dec '16          | Mar '17 | May '17 | Jun '17 | Oct '17 | Dec '16             | Mar '17 | May '17 | Jun '17 | Oct '17 | Dec '16            | Mar '17 | May '17 | Jun '17 | Oct '17 | Dec '16         | Mar '17 | May '17 | Jun '17 | Oct '17 | 2016      | 2017      |           |
| 28   | 53.317754   | 13.528872 | dry              | +       | +       | +       | NA      | +                   | -       | -       | -       | NA      | -                  | +       | +       | +       | NA      | NA              | +       | -       | +       | NA      | Rye       | Wheat     | Arable    |
| 40   | 53.317315   | 13.537215 | dry              | +       | +       | dry     | NA      | +                   | -       | -       | -       | NA      | -                  | +       | +       | -       | NA      | NA              | -       | +       | +       | NA      | Triticale | Corn      | Arable    |
| 133  | 53.367837   | 13.727254 | dry              | dry     | dry     | dry     | NA      | -                   | +       | -       | -       | NA      | -                  | -       | -       | -       | NA      | NA              | -       | -       | -       | NA      | NA        | NA        | Arable    |
| 149  | 53.349858   | 13.758482 | dry              | +       | +       | +       | NA      | -                   | +       | -       | -       | NA      | -                  | +       | +       | +       | NA      | NA              | +       | +       | +       | NA      | Rape      | Wheat     | Arable    |
| 183  | 53.367470   | 13.742717 | dry              | dry     | dry     | dry     | NA      | x                   | +       | -       | -       | NA      | -                  | -       | -       | -       | NA      | NA              | -       | -       | -       | NA      | NA        | NA        | Arable    |
| 187  | 53.363995   | 13.742511 | dry              | +       | +       | +       | NA      | +                   | +       | -       | -       | NA      | -                  | +       | +       | +       | NA      | NA              | -       | +       | +       | NA      | Corn      | Wheat     | Arable    |
| 190  | 53.362444   | 13.727117 | dry              | +       | +       | dry     | NA      | +                   | +       | -       | -       | NA      | -                  | +       | +       | -       | NA      | NA              | +       | +       | -       | NA      | Wheat     | Barley    | Arable    |
| 235  | 53.327811   | 13.721543 | dry              | dry     | dry     | dry     | NA      | -                   | -       | -       | -       | NA      | -                  | -       | -       | -       | NA      | NA              | -       | -       | -       | NA      | NA        | Rape      | Arable    |
| 236  | 53.328479   | 13.721488 | dry              | dry     | dry     | dry     | NA      | -                   | +       | -       | -       | NA      | -                  | -       | -       | -       | NA      | NA              | -       | -       | -       | NA      | NA        | Rape      | Arable    |
| 258  | 53.382468   | 13.707032 | +                | +       | +       | +       | +       | +                   | +       | -       | -       | NA      | -                  | +       | +       | +       | +       | NA              | +       | +       | +       | +       | Barley    | Rape      | Arable    |
| 259  | 53.384092   | 13.706979 | +                | +       | +       | +       | +       | +                   | +       | -       | -       | NA      | -                  | +       | +       | +       | +       | NA              | -       | +       | +       | +       | Barley    | Rape      | Arable    |
| 265  | 53.378195   | 13.704492 | +                | +       | +       | +       | +       | +                   | +       | -       | -       | NA      | -                  | +       | +       | +       | +       | NA              | +       | +       | +       | +       | Wheat     | Wheat     | Arable    |
| 269  | 53.376962   | 13.701001 | dry              | +       | +       | +       | +       | +                   | +       | -       | -       | NA      | -                  | +       | +       | +       | +       | NA              | -       | +       | +       | +       | Wheat     | Corn      | Arable    |
| 275  | 53.385975   | 13.709487 | +                | +       | +       | +       | +       | +                   | +       | -       | -       | NA      | -                  | +       | +       | +       | +       | NA              | -       | +       | +       | +       | Rye       | Barley    | Arable    |
| 287  | 53.385843   | 13.699214 | dry              | +       | +       | +       | +       | +                   | +       | -       | -       | NA      | -                  | +       | +       | +       | +       | NA              | +       | +       | +       | +       | Barley    | Rape      | Arable    |
| 311  | 53.386548   | 13.689226 | dry              | dry     | +       | dry     | NA      | -                   | +       | -       | -       | NA      | -                  | -       | +       | -       | NA      | NA              | -       | +       | -       | NA      | Wheat     | Rape      | Arable    |
| 312  | 53.386734   | 13.686318 | +                | +       | +       | +       | +       | +                   | +       | -       | -       | NA      | -                  | +       | +       | +       | +       | NA              | -       | +       | +       | +       | Wheat     | Rape      | Arable    |
| 319  | 53.378829   | 13.670430 | dry              | dry     | +       | dry     | NA      | x                   | -       | -       | +       | NA      | -                  | -       | +       | -       | NA      | NA              | -       | +       | -       | NA      | NA        | Rape      | Arable    |
| 606  | 53.347328   | 13.629944 | dry              | +       | +       | +       | NA      | +                   | +       | -       | -       | NA      | -                  | +       | +       | +       | NA      | NA              | -       | +       | +       | NA      | Corn      | Corn      | Arable    |
| 607  | 53.347977   | 13.631487 | dry              | +       | +       | dry     | NA      | +                   | +       | -       | -       | NA      | -                  | +       | +       | -       | NA      | NA              | -       | +       | +       | NA      | Rape      | Wheat     | Arable    |
| 608  | 53.348694   | 13.632055 | dry              | dry     | dry     | +       | NA      | -                   | -       | -       | -       | NA      | -                  | -       | -       | +       | NA      | NA              | -       | -       | -       | NA      | Rape      | Wheat     | Arable    |
| 805  | 53.394665   | 13.662017 | dry              | +       | +       | +       | NA      | +                   | +       | -       | -       | NA      | -                  | +       | +       | +       | NA      | NA              | -       | +       | +       | NA      | Rape      | Wheat     | Arable    |
| 807  | 53.397377   | 13.665798 | +                | +       | +       | +       | +       | +                   | +       | -       | -       | NA      | -                  | +       | +       | +       | +       | NA              | +       | +       | +       | +       | Rape      | Wheat     | Arable    |
| 808  | 53.396518   | 13.667568 | dry              | dry     | dry     | dry     | NA      | -                   | +       | -       | -       | NA      | -                  | -       | -       | -       | NA      | NA              | -       | -       | -       | NA      | Rape      | Wheat     | Arable    |
| 892  | 53.406355   | 13.651345 | +                | +       | +       | +       | +       | +                   | +       | -       | -       | NA      | -                  | +       | +       | +       | +       | NA              | +       | -       | +       | +       | Rape      | Wheat     | Arable    |
| 893  | 53.408342   | 13.652892 | dry              | +       | +       | +       | NA      | +                   | +       | -       | -       | NA      | -                  | +       | +       | +       | NA      | NA              | +       | -       | +       | NA      | Rape      | Wheat     | Arable    |
| 907  | 53.405524   | 13.638137 | +                | +       | +       | +       | +       | +                   | +       | -       | -       | NA      | -                  | +       | +       | +       | +       | NA              | -       | +       | +       | +       | Grassland | Grassland | Grassland |
| 908  | 53.405256   | 13.639553 | dry              | dry     | dry     | dry     | NA      | x                   | +       | -       | -       | NA      | -                  | -       | -       | -       | NA      | NA              | -       | -       | -       | NA      | Grassland | Grassland | Grassland |
| 910  | 53.407186   | 13.641936 | dry              | +       | +       | dry     | NA      | +                   | +       | -       | +       | NA      | -                  | +       | +       | -       | NA      | NA              | -       | +       | -       | NA      | Grassland | Grassland | Grassland |
| 911  | 53.408547   | 13.640171 | +                | +       | +       | +       | NA      | +                   | +       | -       | -       | NA      | -                  | +       | +       | +       | NA      | NA              | +       | +       | +       | NA      | Grassland | Grassland | Grassland |
| 939  | 53.415295   | 13.662426 | dry              | +       | +       | +       | NA      | -                   | +       | -       | -       | NA      | -                  | +       | +       | +       | NA      | NA              | -       | +       | +       | NA      | Grassland | Grassland | Grassland |
| 940  | 53.415256   | 13.664351 | dry              | +       | +       | +       | +       | +                   | +       | -       | -       | NA      | -                  | +       | +       | +       | +       | NA              | +       | +       | +       | +       | Grassland | Grassland | Grassland |
| 942  | 53.416030   | 13.665971 | dry              | +       | +       | +       | +       | +                   | +       | -       | -       | NA      | -                  | +       | +       | +       | +       | NA              | +       | +       | +       | +       | Grassland | Grassland | Grassland |
| 1189 | 53.353518   | 13.618345 | dry              | +       | +       | +       | NA      | +                   | +       | -       | -       | NA      | -                  | +       | +       | +       | NA      | NA              | +       | +       | +       | NA      | Barley    | Corn      | Arable    |
| 1228 | 53.364171   | 13.598962 | dry              | +       | +       | dry     | NA      | -                   | +       | -       | +       | NA      | -                  | +       | +       | -       | NA      | NA              | +       | +       | -       | NA      | Forest    | Corn      | Arable    |
| 1229 | 53.363931   | 13.597662 | dry              | +       | +       | dry     | NA      | -                   | -       | -       | -       | NA      | -                  | +       | +       | -       | NA      | NA              | +       | +       | -       | NA      | Forest    | Corn      | Arable    |
| 1338 | 53.309612   | 13.556842 | dry              | +       | +       | dry     | NA      | -                   | +       | -       | +       | NA      | -                  | +       | +       | -       | NA      | NA              | +       | +       | -       | NA      | Wheat     | Barley    | Arable    |
| 1510 | 53.395027   | 13.685878 | dry              | dry     | +       | dry     | NA      | +                   | +       | -       | +       | NA      | -                  | -       | +       | -       | NA      | NA              | -       | +       | -       | NA      | Wheat     | Barley    | Arable    |
| 1590 | 53.303302   | 13.541943 | +                | +       | +       | +       | NA      | +                   | +       | -       | -       | NA      | -                  | +       | +       | +       | NA      | NA              | +       | +       | +       | NA      | Barley    | Rape      | Forest    |
| 1598 | 53.308537   | 13.553018 | dry              | +       | +       | +       | NA      | x                   | +       | -       | -       | NA      | -                  | +       | +       | +       | NA      | NA              | +       | +       | +       | NA      | Wheat     | Wheat     | Arable    |
| 1599 | 53.308914   | 13.551857 | +                | +       | +       | dry     | NA      | x                   | -       | -       | +       | NA      | -                  | +       | +       | -       | NA      | NA              | +       | +       | -       | NA      | Wheat     | Wheat     | Arable    |
| 1604 | 53.306172   | 13.551442 | dry              | +       | +       | +       | NA      | +                   | -       | -       | -       | NA      | -                  | +       | +       | +       | NA      | NA              | +       | +       | +       | NA      | Wheat     | Wheat     | Arable    |
| 2484 | 53.352275   | 13.623681 | dry              | +       | +       | +       | NA      | +                   | +       | -       | -       | NA      | -                  | +       | +       | +       | NA      | NA              | +       | +       | -       | NA      | Barley    | Corn      | Arable    |
| 2489 | 53.355749   | 13.620038 | dry              | dry     | +       | +       | NA      | -                   | +       | -       | -       | NA      | -                  | -       | +       | +       | NA      | NA              | -       | +       | +       | NA      | Barley    | Corn      | Arable    |
| 2565 | 53.306179   | 13.558765 | dry              | +       | +       | +       | NA      | x                   | +       | -       | -       | NA      | -                  | +       | +       | +       | NA      | NA              | -       | +       | +       | NA      | Rape      | Wheat     | Forest    |
| A    | 53.413945   | 13.663804 | NA               | +       | +       | +       | NA      | NA                  | +       | -       | -       | NA      | NA                 | +       | +       | +       | NA      | NA              | +       | +       | +       | NA      | Forest    | Forest    | Forest    |
| B    | 53.414943   | 13.667696 | NA               | +       | +       | +       | NA      | NA                  | +       | -       | -       | NA      | NA                 | +       | +       | +       | NA      | NA              | -       | +       | +       | NA      | Grassland | Grassland | Grassland |
| C    | 53.415976   | 13.661671 | NA               | dry     | +       | dry     | NA      | NA                  | +       | -       | -       | NA      | NA                 | -       | +       | -       | NA      | NA              | -       | -       | -       | NA      | Grassland | Grassland | Grassland |
| D    | 53.385634   | 13.709338 | NA               | +       | +       | +       | dry     | NA                  | -       | -       | -       | NA      | NA                 | +       | +       | +       | -       | NA              | +       | +       | +       | -       | Barley    | Rape      | Arable    |
| E    | 53.383527   | 13.708374 | NA               | +       | +       | +       | +       | NA                  | -       | -       | -       | NA      | NA                 | +       | +       | +       | +       | NA              | -       | +       | +       | -       | Barley    | Rape      | Arable    |
| F    | 53.393498   | 13.663738 | NA               | +       | +       | +       | NA      | NA                  | -       | -       | -       | NA      | NA                 | +       | +       | +       | NA      | NA              | +       | +       | +       | NA      | Rape      | Wheat     | Arable    |
| G    | 53.355291   | 13.615695 | NA               | +       | +       | +       | NA      | NA                  | -       | -       | -       | NA      | NA                 | +       | +       | +       | NA      | NA              | -       | +       | +       | NA      | Corn      | Wheat     | Arable    |
| H    | 53.346533   | 13.759664 | NA               | +       | +       | dry     | NA      | NA                  | +       | -       | +       | NA      | NA                 | +       | +       | -       | NA      | NA              | +       | +       | -       | NA      | Rape      | Wheat     | Arable    |
| I    | 53.364154   | 13.744220 | NA               | +       | +       | dry     | NA      | NA                  | -       | -       | -       | NA      | NA                 | +       | +       | -       | NA      | NA              | +       | +       | -       | NA      | Corn      | Wheat     | Arable    |
| J    | 53.306989   | 13.553221 | NA               | +       | +       | +       | NA      | NA                  | +       | -       | -       | NA      | NA                 | +       | +       | +       | NA      | NA              | +       | -       | +       | NA      | Wheat     | Wheat     | Arable    |

| #KH | Coordinates |           | Water Collection |         |         |         |         | Sediment collection |         |         |         |         | In-Situ parameters |         |         |         |         | Water chemistry |         |         |         |         | Crops     |           | Landuse |
|-----|-------------|-----------|------------------|---------|---------|---------|---------|---------------------|---------|---------|---------|---------|--------------------|---------|---------|---------|---------|-----------------|---------|---------|---------|---------|-----------|-----------|---------|
|     | Lat         | Long      | Dec '16          | Mar '17 | May '17 | Jun '17 | Oct '17 | Dec '16             | Mar '17 | May '17 | Jun '17 | Oct '17 | Dec '16            | Mar '17 | May '17 | Jun '17 | Oct '17 | Dec '16         | Mar '17 | May '17 | Jun '17 | Oct '17 | 2016      | 2017      |         |
| K   | 53.306335   | 13.559830 | NA               | +       | +       | +       | NA      | NA                  | +       | -       | -       | NA      | NA                 | +       | +       | +       | NA      | NA              | +       | +       | +       | NA      | Rape      | Wheat     | Forest  |
| L   | 53.305043   | 13.561817 | NA               | +       | +       | +       | NA      | NA                  | -       | -       | -       | NA      | NA                 | +       | +       | +       | NA      | NA              | +       | +       | +       | NA      | Rape      | Wheat     | Arable  |
| M   | 53.303807   | 13.539182 | NA               | +       | +       | dry     | NA      | NA                  | -       | -       | +       | NA      | NA                 | +       | +       | -       | NA      | NA              | +       | +       | -       | NA      | Barley    | Triticale | Arable  |
| N   | 53.316667   | 13.538287 | NA               | +       | +       | +       | NA      | NA                  | -       | -       | -       | NA      | NA                 | +       | +       | +       | NA      | NA              | +       | +       | +       | NA      | Triticale | Corn      | Arable  |
| O   | 53.360647   | 13.598382 | NA               | +       | +       | +       | NA      | NA                  | +       | -       | -       | NA      | NA                 | +       | +       | +       | NA      | NA              | -       | +       | +       | NA      | Forest    | Forest    | Forest  |
| P   | 53.360999   | 13.598467 | NA               | +       | +       | +       | NA      | NA                  | +       | -       | -       | NA      | NA                 | +       | +       | +       | NA      | NA              | +       | +       | +       | NA      | Forest    | Forest    | Forest  |
| Q   | 53.360195   | 13.598307 | NA               | +       | +       | +       | NA      | NA                  | +       | -       | -       | NA      | NA                 | +       | +       | +       | NA      | NA              | -       | +       | +       | NA      | Forest    | Forest    | Forest  |
| R   | 53.360190   | 13.598448 | NA               | +       | +       | +       | NA      | NA                  | +       | -       | -       | NA      | NA                 | +       | +       | +       | NA      | NA              | -       | +       | +       | NA      | Forest    | Forest    | Forest  |
| S   | 53.361987   | 13.597970 | NA               | +       | +       | +       | NA      | NA                  | +       | -       | -       | NA      | NA                 | +       | +       | +       | NA      | NA              | -       | +       | +       | NA      | Forest    | Forest    | Forest  |
| T   | 53.361270   | 13.596169 | NA               | +       | +       | dry     | NA      | NA                  | +       | -       | +       | NA      | NA                 | +       | +       | -       | NA      | NA              | +       | -       | -       | NA      | Forest    | Forest    | Forest  |
