# Supplementary material for: From microbes to mammals: pond biodiversity homogenization across different land-use types in an agricultural landscape
Source: bioRxiv or medRxiv preprint supplement (doi:10.1101/2022.01.28.477988), 2022-01-28
Supplement: Supplementary file [file media-4.pdf]

| Sample Name | KH#  | Month | General descriptors |      |        |      |       |       | Physical and Chemical parameters |          |       |        |        |         |       |        |      |       |       |       |      |       |         |       |       |       |       |       |        |      |      |       |        |       |        |        |        |    |
|-------------|------|-------|---------------------|------|--------|------|-------|-------|----------------------------------|----------|-------|--------|--------|---------|-------|--------|------|-------|-------|-------|------|-------|---------|-------|-------|-------|-------|-------|--------|------|------|-------|--------|-------|--------|--------|--------|----|
|             |      |       | Landuse             | Reed | Canopy | Size | Depth | Perm. | pH                               | Cond. µS | Temp  | Tiefe  | O2 Sat | O2 mg/L | Cl    | SO4    | TP   | DOC   | NO3-N | NH4-N | NO2  | TN    | o-PO4-P | o-PO4 | TP    | Na    | K     | Mg    | Ca     | Br   | TFe  | TOC   | SAK    | NO2-N | E0     | Eh     | An-N   |    |
| 1189W2      | 1189 | Mar   | Arable              | Y    | N      | M    | S     | 3     | 7.87                             | 571      | 7.98  | 35.00  | 105.6  | 12.15   | 20.98 | 117.83 | 0.06 | 15.99 | 4.77  | 0.01  | 0.01 | 7.52  | 0.02    | 0.05  | 0.04  | 6.25  | 15.77 | 4.81  | 95.14  | 0.00 | 0.10 | 18.54 | 44.02  | 0.00  | NA     | NA     | 4.79   |    |
| 1189W3      | 1189 | May   | Arable              | Y    | N      | M    | S     | 3     | 7.19                             | 459      | 17.92 | 35.00  | 98     | 8.92    | 12.47 | 60.20  | 0.16 | 21.31 | 0.00  | 0.00  | NA   | 1.64  | 0.10    | 0.29  | 0.06  | 8.13  | 12.58 | 7.32  | 65.72  | 0.00 | 0.27 | 21.47 | NA     | NA    | NA     | NA     | NA     |    |
| 1189W4      | 1189 | Jun   | Arable              | Y    | N      | M    | S     | 3     | 6.90                             | 468      | 19.9  | 35.00  | 0.4    | 0.04    | 19.08 | 43.80  | 0.79 | 25.33 | 0.04  | 0.02  | NA   | 2.32  | 0.55    | 1.70  | 0.23  | 7.42  | 17.35 | 6.43  | 62.87  | 0.00 | 0.12 | NA    | 3.48   | NA    | NA     | -22.00 | 188.00 | NA |
| 1228W2      | 1228 | Mar   | Arable              | N    | Y      | S    | S     | 2     | 6.63                             | 580      | 9.36  | 30.00  | 86     | 9.57    | 19.92 | 79.15  | 0.21 | 21.23 | 11.15 | NA    | 0.00 | 14.02 | 0.20    | 0.61  | 0.01  | 7.43  | 21.44 | 7.80  | 69.86  | 0.00 | NA   | 22.14 | NA     | 0.00  | NA     | NA     | NA     |    |
| 1228W3      | 1228 | May   | Arable              | N    | Y      | S    | S     | 2     | 6.06                             | 333      | 13.06 | 20.00  | 17.9   | 1.84    | 15.74 | 90.41  | 1.14 | 42.45 | 0.01  | 0.14  | NA   | 2.85  | 0.81    | NA    | NA    | 8.84  | 8.11  | 7.09  | 44.96  | NA   | 0.41 | 44.82 | 156.06 | NA    | NA     | NA     | NA     |    |
| 1229W2      | 1229 | Mar   | Arable              | N    | Y      | S    | S     | 2     | 7.65                             | 270      | 8.74  | 30.00  | 34.8   | 3.9     | 11.33 | 62.92  | 0.55 | 25.34 | 0.75  | NA    | 0.00 | 2.17  | 0.52    | 1.60  | 0.03  | 2.50  | 22.62 | 4.96  | 40.17  | 0.00 | NA   | 26.94 | NA     | 0.00  | NA     | NA     | NA     |    |
| 1229W3      | 1229 | May   | Arable              | N    | Y      | S    | S     | 2     | 6.80                             | 251      | 12.25 | 20.00  | 4.97   | 47.4    | 13.58 | 29.87  | 1.86 | 57.85 | 0.02  | 0.39  | NA   | 3.29  | 1.20    | NA    | NA    | 4.96  | 22.57 | 5.17  | 22.94  | 0.05 | 0.34 | 58.56 | 224.04 | NA    | NA     | NA     | NA     |    |
| 1338W2      | 1338 | Mar   | Arable              | N    | N      | M    | S     | 2     | 7.80                             | 207      | 10.92 | 20.00  | 98     | 10.5    | 11.07 | 32.32  | 0.21 | 12.68 | 2.79  | 1.21  | 0.12 | 6.37  | 0.02    | 0.06  | 0.19  | 3.72  | 10.95 | 3.04  | 40.76  | 0.00 | 0.81 | 15.74 | 49.75  | 0.04  | NA     | NA     | 4.03   |    |
| 1338W3      | 1338 | May   | Arable              | N    | N      | M    | S     | 2     | 7.99                             | 195      | 21.09 | 15.00  | 70.3   | 6.14    | 13.16 | 18.44  | 0.90 | 32.48 | 0.05  | 0.17  | NA   | 2.98  | 0.30    | NA    | NA    | 2.97  | 21.08 | 6.10  | 14.97  | 0.04 | 0.26 | 36.51 | 87.78  | NA    | NA     | NA     | NA     |    |
| 149W2       | 149  | Mar   | Arable              | N    | Y      | L    | S     | 3     | 7.60                             | 1102     | 9.46  | 70.00  | 72.3   | 7.91    | 38.47 | 136.42 | 0.07 | 16.83 | 5.58  | NA    | 0.00 | 7.31  | 0.08    | 0.24  | -0.01 | 17.16 | 9.76  | 16.50 | 130.26 | 0.00 | NA   | 17.61 | NA     | 0.00  | NA     | NA     | NA     |    |
| 149W3       | 149  | May   | Arable              | N    | Y      | L    | S     | 3     | 7.74                             | 1162     | 8.35  | 40.00  | 51.3   | 5.77    | 49.40 | 177.99 | 0.07 | 19.54 | 0.09  | 0.07  | NA   | 1.88  | 0.07    | 0.21  | 0.00  | 24.26 | 8.35  | 22.73 | 143.97 | 0.00 | 0.09 | 23.55 | NA     | NA    | NA     | NA     | NA     |    |
| 149W4       | 149  | Jun   | Arable              | N    | Y      | L    | S     | 3     | 8.26                             | 1100     | 18.3  | 25.00  | 77.7   | 7.51    | 50.78 | 98.60  | 0.61 | 30.30 | 0.06  | 0.04  | NA   | 1.96  | 0.55    | 1.70  | 0.05  | 20.57 | 9.58  | 16.70 | 151.08 | 0.40 | 0.05 | NA    | 3.44   | NA    | 115.90 | 325.90 | NA     |    |
| 1510W3      | 1510 | May   | Arable              | N    | N      | S    | S     | 1     | 10.82                            | 520      | 17.38 | 15.00  | 278.9  | 25.9    | 58.97 | 25.69  | 0.97 | 40.66 | 0.66  | 0.22  | 0.41 | 9.58  | 0.29    | 0.89  | 0.68  | 8.75  | 33.73 | 28.92 | 48.23  | 0.20 | 0.34 | 49.01 | 69.65  | 0.12  | NA     | NA     | 1.01   |    |
| 1590W2      | 1590 | Mar   | Forest              | N    | Y      | L    | S     | 3     | 7.90                             | 588      | 9.83  | 50.00  | 52     | 5.7     | 26.20 | 84.87  | 0.05 | 26.65 | 4.34  | 0.09  | 0.25 | 7.19  | 0.02    | 0.05  | 0.03  | 8.29  | 8.10  | 7.52  | 86.29  | 0.00 | 0.09 | 27.88 | 81.22  | 0.08  | NA     | NA     | 4.50   |    |
| 1590W3      | 1590 | May   | Forest              | N    | Y      | L    | S     | 3     | 8.12                             | 6.56     | 14.92 | 40.00  | 70.4   | 6.94    | NA    | NA     | NA   | NA    | NA    | NA    | NA   | NA    | NA      | NA    | NA    | NA    | NA    | NA    | NA     | NA   | NA   | NA    | NA     | NA    | NA     | NA     | NA     |    |
| 1590W4      | 1590 | Jun   | Forest              | N    | Y      | L    | S     | 3     | 7.29                             | 612      | 15.1  | 30.00  | 23     | 2.28    | 24.94 | 38.83  | 0.37 | 34.04 | 0.06  | 0.11  | NA   | 2.29  | 0.17    | 0.52  | 0.20  | 5.60  | 5.01  | 3.69  | 30.57  | 0.10 | 0.04 | NA    | 3.64   | NA    | 117.20 | 327.20 | NA     |    |
| 1598W2      | 1598 | Mar   | Arable              | Y    | P      | L    | D     | 3     | 8.21                             | 208      | 6.98  | 150.00 | 57.7   | 6.92    | 17.06 | 33.82  | 0.52 | 20.78 | 0.02  | 0.08  | 0.00 | 2.03  | 0.39    | 1.19  | 0.13  | 4.47  | 10.72 | 2.87  | 41.30  | 0.00 | 0.06 | 21.57 | 71.70  | 0.00  | NA     | NA     | 0.10   |    |
| 1598W3      | 1598 | May   | Arable              | Y    | P      | L    | D     | 3     | 7.26                             | 303      | 16.07 | 100.00 | 40.9   | 3.96    | 19.88 | 20.87  | 0.67 | 22.74 | 0.02  | 0.13  | NA   | 1.51  | 0.53    | NA    | NA    | 7.63  | 15.54 | 6.39  | 33.48  | 0.05 | 0.19 | 24.77 | 67.80  | NA    | NA     | NA     | NA     |    |
| 1598W4      | 1598 | Jun   | Arable              | Y    | P      | L    | D     | 3     | 6.49                             | 316      | 15.9  | 30.00  | 37.2   | 3.5     | 20.73 | 5.66   | 1.19 | 24.15 | 0.03  | 0.03  | NA   | 1.89  | 1.20    | 3.68  | -0.01 | 8.00  | 14.18 | 5.95  | 34.48  | 0.01 | 0.06 | NA    | 3.09   | NA    | 172.90 | 382.90 | NA     |    |
| 1599W2      | 1599 | Mar   | Arable              | Y    | N      | M    | S     | 2     | 7.70                             | 340      | 6.98  | 30.00  | 75.1   | 8.94    | 15.70 | 61.83  | 0.08 | 20.73 | 0.21  | 0.06  | 0.00 | 1.90  | 0.04    | 0.13  | 0.04  | 3.09  | 6.51  | 4.40  | 40.92  | 0.00 | 0.05 | 22.75 | 72.00  | 0.00  | NA     | NA     | 0.27   |    |
| 1599W3      | 1599 | May   | Arable              | Y    | N      | M    | S     | 2     | 7.97                             | 550      | 15.16 | 15.00  | 18.5   | 1.82    | NA    | NA     | NA   | NA    | NA    | NA    | NA   | NA    | NA      | NA    | NA    | NA    | NA    | NA    | NA     | NA   | NA   | NA    | NA     | NA    | NA     | NA     | NA     |    |
| 1604W2      | 1604 | Mar   | Arable              | Y    | P      | L    | S     | 3     | 8.10                             | 638      | 8.99  | 30.00  | 125    | 14      | 61.19 | 78.70  | 0.05 | 13.21 | 1.20  | 0.00  | 0.00 | 2.66  | 0.04    | 0.12  | 0.01  | 18.57 | 5.57  | 6.83  | 93.08  | 0.06 | 0.17 | 14.70 | 40.77  | 0.00  | NA     | NA     | 1.21   |    |
| 1604W3      | 1604 | May   | Arable              | Y    | P      | L    | S     | 3     | 8.19                             | 775      | 14.99 | 50.00  | 18     | 1.78    | 45.71 | 55.07  | 0.34 | 15.28 | 0.03  | 0.14  | NA   | 1.38  | 0.07    | NA    | NA    | 24.91 | 12.18 | 11.71 | 62.00  | 0.03 | 0.02 | 15.31 | 42.00  | NA    | NA     | NA     | NA     |    |
| 1604W4      | 1604 | Jun   | Arable              | Y    | P      | L    | S     | 3     | 7.37                             | 795      | 18.2  | 50.00  | 33.7   | 3.13    | 38.53 | 15.67  | 0.60 | 16.60 | 0.05  | 0.01  | NA   | 1.33  | 0.21    | 0.66  | 0.39  | 7.82  | 5.04  | 3.81  | 38.25  | 0.75 | 0.07 | NA    | 3.13   | NA    | 166.70 | 376.70 | NA     |    |
| 187W3       | 187  | May   | Arable              | Y    | N      | M    | S     | 3     | 7.49                             | 1084     | 11.06 | 60.00  | 33.8   | 3.57    | 33.86 | 213.88 | 0.16 | 18.49 | 0.00  | 0.01  | NA   | 1.98  | 0.13    | 0.39  | 0.03  | 15.28 | 13.73 | 15.98 | 146.03 | 0.00 | 0.08 | 21.81 | NA     | NA    | NA     | NA     | NA     |    |
| 187W4       | 187  | Jun   | Arable              | Y    | N      | M    | S     | 3     | 7.72                             | 1133     | 19.6  | 50.00  | 31     | 2.84    | 32.53 | 147.84 | 0.96 | 22.82 | 0.05  | 0.03  | NA   | 2.37  | 0.89    | 2.72  | 0.07  | 16.97 | 9.24  | 16.75 | 190.45 | 0.63 | 0.02 | NA    | 2.83   | NA    | 43.30  | 253.30 | NA     |    |
| 190W2       | 190  | Mar   | Arable              | Y    | N      | M    | S     | 2     | 6.10                             | 1604     | 14.23 | 30.00  | 67     | 6.6     | 40.91 | 609.05 | 0.11 | 15.48 | 11.49 | NA    | 0.00 | 15.60 | 0.05    | 0.14  | 0.06  | 30.80 | 25.45 | 14.62 | 237.90 | 0.00 | NA   | 16.78 | NA     | 0.00  | NA     | NA     | NA     |    |
| 190W3       | 190  | May   | Arable              | Y    | N      | M    | S     | 2     | 7.10                             | 779      | 13.53 | 50.00  | 113.1  | 11.3    | 10.63 | 268.92 | 0.24 | 30.80 | 0.00  | 0.09  | NA   | 3.53  | 0.17    | 0.52  | 0.07  | 6.13  | 16.09 | 10.14 | 141.14 | 0.00 | 0.80 | 35.68 | NA     | NA    | NA     | NA     | NA     |    |
| 2484W2      | 2484 | Mar   | Arable              | Y    | N      | L    | D     | 3     | 8.97                             | 449      | 7.43  | 170.00 | 135    | 9.37    | 19.52 | 33.88  | 0.08 | 16.62 | 3.87  | 0.04  | 0.30 | 6.20  | 0.02    | 0.06  | 0.06  | 7.10  | 4.17  | 6.05  | 93.46  | 0.00 | 0.19 | 16.76 | 29.11  | 0.09  | NA     | NA     | 4.00   |    |
| 2484W3      | 2484 | May   | Arable              | Y    | N      | L    | D     | 3     | 9.04                             | 448      | 13.45 | 200.00 | 141    | 14.12   | 16.21 | 33.07  | 0.39 | 14.90 | 1.16  | 0.05  | NA   | 3.22  | 0.11    | 0.33  | 0.29  | 10.18 | 9.67  | 8.46  | 47.82  | 0.00 | 0.54 | 18.98 | NA     | NA    | NA     | NA     | NA     |    |
| 2489W3      | 2489 | May   | Arable              | Y    | N      | S    | S     | 2     | 8.16                             | 574      | 17.19 | 40.00  | 241.4  | 22.27   | 12.87 | 15.28  | 0.97 | 23.54 | 0.01  | 0.04  | NA   | 2.49  | 0.90    | 2.75  | 0.08  | 5.64  | 24.83 | 6.28  | 46.04  | 0.10 | 0.22 | 30.27 | NA     | NA    | NA     | NA     | NA     |    |
| 2489W4      | 2489 | Jun   | Arable              | Y    | N      | S    | S     | 2     | 6.77                             | 656      | 21.1  | 30.00  | 79.2   | 2.58    | 24.77 | 1.38   | 2.67 | 51.52 | 0.09  | 0.18  | NA   | 5.11  | 0.24    | 0.74  | 2.43  | 4.75  | 22.89 | 5.36  | 41.87  | 0.17 | 0.15 | NA    | 3.60   | NA    | -1.00  | 209.00 | NA     |    |
| 2565W3      | 2565 | Jun   | Forest              | N    | Y      | L    | S     | 3     | 7.78                             | 275      | 15.75 | 90.00  | 31.9   | 3.11    | 20.28 | 22.74  | 0.65 | 41.19 | 0.09  | 0.55  | NA   | 3.56  | 0.35    | NA    | NA    | 6.87  | 13.22 | 5.37  | 31.07  | 0.02 | 0.85 | 49.87 | 184.83 | 0.00  | NA     | NA     | NA     | NA |
| 2565W4      | 2565 | Jun   | Forest              | N    | Y      | L    | S     | 3     | 6.28                             | 234      | 15.4  | 90.00  | 18.3   | 1.8     | 17.06 | 13.02  | 0.35 | 43.25 | 0.02  | 0.02  | NA   | 3.23  | 0.26    | 0.80  | 0.08  | 5.49  | 8.25  | 4.33  | 25.23  | 0.10 | 0.17 | NA    | 3.99   | NA    | 162.30 | 372.30 | NA     |    |
| 258W2       | 258  | Mar   | Arable              | N    | N      | M    | D     | 3     | 7.63                             | 743      | 6.92  | 100.00 | 106.9  | 12.7    | 25.60 | 153.61 | 0.05 | 12.59 | 4.81  | 0.01  | 0.08 | 6.96  | 0.02    | 0.06  | 0.03  | 9.04  | 9.40  | 9.92  | 104.18 | 0.00 | 0.05 | 13.46 | 24.70  | 0.02  | NA     | NA     | 4.84   |    |
| 258W3       | 258  | May   | Arable              | N    | N      | M    | D     | 3     | 7.89                             | 606      | 14.61 | 150.00 | 95.5   | 9.34    | 21.03 | 151.41 | 0.07 | 13.80 | 0.00  | 0.18  | NA   | 1.59  | 0.04    | 0.12  | 0.03  | 10.61 | 11.84 | 13.41 | 83.49  | 0.00 | 0.14 | 14.91 | NA     | NA    | NA     | NA     | NA     |    |
| 258W4       | 258  | Jun   | Arable              | N    | N      | M    | D     | 3     | 7.65                             | 676      | 21.56 | 110.00 | 46.1   | 3.95    | 22.68 | 283.83 | 0.82 | 32.26 | 0.39  | 0.17  | NA   | 4.05  | 0.75    | 2.31  | 0.06  | 29.40 | 22.26 | 16.21 | 158.98 | 0.00 | 0.10 | 33.26 | NA     | NA    | NA     | NA     | NA     |    |
| 258W5       | 258  | Oct   | Arable              | N    | N      | M    | D     | 3     | 7.67                             | 627      | 11.9  | NA     | NA     | NA      | 29.03 | 90.59  | 0.43 | 17.40 | 0.04  | 1.58  | NA   | 3.18  | 0.35    | 1.07  | 0.08  | 13.70 | 16.37 | 14.12 | 95.81  | 0.00 | 0.20 | 18.62 | 48.06  | NA    | 172.40 |        |        |    |

| Sample Name | KH# | Month | General descriptors |      |        |      |       |       |      | Physical and Chemical parameters |       |        |        |         |       |        |       |       |       |       |      |       |         |       |       |       |       |       |        |      |       |       |        |        |        |        |      |
|-------------|-----|-------|---------------------|------|--------|------|-------|-------|------|----------------------------------|-------|--------|--------|---------|-------|--------|-------|-------|-------|-------|------|-------|---------|-------|-------|-------|-------|-------|--------|------|-------|-------|--------|--------|--------|--------|------|
|             |     |       | Landuse             | Reed | Canopy | Size | Depth | Perm. | pH   | Cond. µS                         | Temp  | Tiefe  | O2 Sat | O2 mg/L | Cl    | SO4    | TP    | DOC   | NO3-N | NH4-N | NO2  | TN    | α-PO4-P | o-PO4 | TP    | Na    | K     | Mg    | Ca     | Br   | TFe   | TOC   | SAK    | NO2-N  | E0     | Eh     | An-N |
| 311W3       | 311 | May   | Arable              | N    | P      | L    | S     | 1     | 6.34 | 389                              | 12.73 | 25.00  | 64.7   | 6.64    | 3.29  | 144.95 | 0.27  | 18.07 | 0.00  | 0.08  | NA   | 1.87  | 0.22    | 0.66  | 0.06  | 1.97  | 13.97 | 6.80  | 40.44  | 0.00 | 0.23  | 19.44 | NA     | NA     | NA     | NA     | NA   |
| 312W3       | 312 | May   | Arable              | Y    | N      | L    | S     | 3     | 8.64 | 647                              | 14.83 | 25.00  | 84.4   | 8.27    | 24.41 | 141.38 | 0.06  | 23.06 | 1.25  | 0.10  | 0.07 | NA    | 0.02    | 0.06  | 0.04  | 10.57 | 9.18  | 11.05 | 107.93 | 0.03 | 0.25  | 23.43 | 50.60  | 0.02   | NA     | NA     | 1.37 |
| 312W4       | 312 | Jun   | Arable              | Y    | N      | L    | S     | 3     | 7.17 | 611                              | 19.9  | NA     | 52     | 4.32    | 22.93 | 115.23 | 0.14  | 25.98 | 0.03  | 0.10  | NA   | 2.16  | 0.04    | 0.11  | 0.11  | 10.84 | 5.26  | 10.15 | 106.48 | 0.09 | 0.90  | NA    | 2.76   | NA     | 161.90 | 371.90 | NA   |
| 312W5       | 312 | Oct   | Arable              | Y    | N      | L    | S     | 3     | 9.08 | 252                              | 13.2  | NA     | NA     | NA      | 15.86 | 4.38   | 0.26  | 26.35 | 0.00  | 0.00  | NA   | 2.18  | 0.09    | 0.28  | 0.17  | 10.35 | 4.90  | 4.04  | 39.05  | 0.00 | 3.34  | 29.29 | 68.16  | NA     | 115.60 | 325.60 | NA   |
| 319W3       | 319 | May   | Arable              | N    | Y      | S    | S     | 1     | 6.30 | 298                              | 14.2  | 15.00  | 40.1   | 3.95    | NA    | NA     | NA    | NA    | NA    | NA    | NA   | NA    | NA      | NA    | NA    | NA    | NA    | NA    | NA     | NA   | NA    | NA    | NA     | NA     | NA     | NA     | NA   |
| 40W3        | 40  | May   | Arable              | N    | Y      | M    | S     | 2     | 8.22 | 450                              | 14.18 | 20.00  | 71     | 7.13    | 34.93 | 37.20  | 2.93  | 33.70 | 0.03  | 0.27  | NA   | 2.74  | 1.51    | NA    | NA    | 10.13 | 29.40 | 8.90  | 51.60  | 0.02 | 0.30  | 35.61 | 109.74 | NA     | NA     | NA     | NA   |
| 40W4        | 40  | Jun   | Arable              | N    | Y      | M    | S     | 2     | 7.16 | 465                              | 15    | NA     | 8.9    | 0.9     | 31.96 | 26.58  | 1.40  | 33.43 | 0.02  | 1.70  | NA   | 4.13  | 1.80    | 5.53  | -0.40 | 10.79 | 19.31 | 7.62  | 59.39  | 0.03 | 0.24  | NA    | 3.86   | NA     | 33.20  | 243.20 | NA   |
| 606W3       | 606 | May   | Arable              | N    | P      | M    | S     | 3     | 9.50 | 540                              | 19.99 | 50.00  | 133    | 11.59   | 17.21 | 66.20  | 0.67  | 24.91 | 0.00  | 0.15  | NA   | 2.90  | 0.53    | 1.61  | 0.14  | 10.39 | 27.93 | 11.87 | 56.13  | 0.00 | 0.18  | 27.30 | NA     | NA     | NA     | NA     | NA   |
| 606W4       | 606 | Jun   | Arable              | N    | P      | M    | S     | 3     | 7.43 | 674                              | 21.3  | NA     | 11.5   | 1.01    | 23.75 | 9.97   | 1.47  | 73.14 | 0.03  | 3.94  | NA   | 8.97  | 2.68    | 8.21  | -1.21 | 10.34 | 33.34 | 10.69 | 71.65  | 0.48 | 0.84  | NA    | 1.57   | NA     | 106.90 | 316.90 | NA   |
| 607W3       | 607 | May   | Arable              | Y    | N      | M    | S     | 3     | 7.79 | 688                              | 15.09 | 30.00  | 68.6   | 6.61    | 20.16 | 83.41  | 0.09  | 37.55 | 0.00  | 0.10  | NA   | 1.81  | 0.06    | 0.18  | 0.03  | 11.84 | 6.67  | 9.06  | 86.80  | 0.00 | 0.28  | 39.50 | NA     | NA     | NA     | NA     | NA   |
| 607W4       | 607 | Jun   | Arable              | Y    | N      | M    | S     | 3     | 7.22 | 623                              | 22.3  | NA     | 35.6   | 3.05    | 20.37 | 15.82  | 0.66  | 55.53 | 0.03  | 0.07  | NA   | 2.35  | 0.57    | 1.73  | 0.09  | 12.06 | 6.80  | 8.27  | 99.85  | 0.58 | 0.10  | NA    | 1.77   | NA     | 171.50 | 381.50 | NA   |
| 805W3       | 805 | May   | Arable              | Y    | Y      | L    | D     | 3     | 7.34 | 572                              | 9.45  | 50.00  | 61.2   | 6.77    | 33.58 | 184.38 | 0.09  | 21.39 | 0.06  | 0.03  | NA   | 1.80  | 0.03    | 0.10  | 0.06  | 15.12 | 7.17  | 8.67  | 84.56  | 0.00 | 0.73  | 22.59 | NA     | NA     | NA     | NA     | NA   |
| 805W4       | 805 | Jun   | Arable              | Y    | Y      | L    | D     | 3     | 6.60 | 540                              | 18.4  | NA     | 29.8   | 2.79    | 30.73 | 109.12 | 0.21  | 27.55 | 0.04  | 0.01  | NA   | 1.73  | 0.16    | 0.48  | 0.06  | 16.29 | 4.03  | 9.79  | 87.90  | 0.03 | 0.12  | NA    | 2.93   | NA     | -38.70 | 171.30 | NA   |
| 807W2       | 807 | Mar   | Arable              | Y    | N      | L    | D     | 3     | 7.88 | 301                              | 7.19  | 100.00 | 102    | 11.99   | 15.94 | 31.54  | 0.05  | 13.71 | 0.18  | 0.00  | 0.00 | 1.37  | 0.01    | 0.03  | 0.04  | 3.81  | 10.53 | 3.42  | 26.07  | 0.00 | 0.51  | 14.41 | 33.07  | 0.00   | NA     | NA     | 0.18 |
| 807W3       | 807 | May   | Arable              | Y    | N      | L    | D     | 3     | 7.61 | 313                              | 12.4  | 150.00 | 69     | 7.13    | 9.82  | 9.73   | 0.07  | 15.82 | 0.00  | 0.00  | NA   | 1.27  | 0.02    | 0.06  | 0.05  | 3.46  | 14.77 | 5.67  | 33.58  | 0.00 | 0.85  | 15.98 | NA     | NA     | NA     | NA     | NA   |
| 807W4       | 807 | Jun   | Arable              | Y    | N      | L    | D     | 3     | 7.16 | 320                              | 18.1  | NA     | 48.2   | 4.51    | 20.42 | 53.73  | 0.18  | 17.99 | 0.03  | 0.01  | NA   | 1.19  | 0.07    | 0.21  | 0.11  | 3.93  | 16.99 | 6.47  | 45.97  | 0.02 | 1.20  | NA    | 2.92   | NA     | 138.80 | 348.80 | NA   |
| 807W5       | 807 | Oct   | Arable              | Y    | N      | L    | D     | 3     | 6.94 | 271                              | 10.9  | NA     | NA     | NA      | 12.20 | 0.34   | 0.33  | 14.64 | 0.00  | 0.00  | NA   | 1.33  | 0.08    | 0.24  | 0.25  | 4.45  | 16.42 | 5.62  | 34.82  | 0.00 | 4.09  | 16.75 | 37.61  | NA     | 168.60 | 378.60 | NA   |
| 892W2       | 892 | Mar   | Arable              | Y    | N      | L    | D     | 3     | 8.59 | 415                              | 6.18  | 150.00 | 158.6  | 19.18   | 40.31 | 17.19  | 0.11  | 14.60 | 0.09  | NA    | 0.00 | 2.39  | 0.08    | 0.24  | 0.03  | 18.68 | 24.04 | 11.52 | 66.97  | 0.00 | NA    | 15.31 | 19.78  | 0.00   | NA     | NA     | NA   |
| 892W4       | 892 | Jun   | Arable              | Y    | N      | L    | D     | 3     | 8.45 | 484                              | 16.8  | 170.00 | 78.1   | 7.55    | 30.45 | 9.34   | 0.11  | 13.42 | 0.02  | 0.01  | NA   | 1.23  | 0.11    | 0.34  | 0.00  | 9.67  | 10.37 | 9.51  | 57.45  | 0.01 | 0.03  | NA    | 2.05   | NA     | 161.90 | 371.90 | NA   |
| 892W5       | 892 | Oct   | Arable              | Y    | N      | L    | D     | 3     | 7.15 | 389                              | 10.5  | NA     | 42.2   | 2.4     | 26.32 | 6.94   | 0.12  | 11.99 | 0.06  | 0.39  | NA   | 1.53  | 0.12    | 0.35  | 0.01  | 9.80  | 12.72 | 9.95  | 49.90  | 0.00 | 0.02  | 13.26 | 33.41  | NA     | 219.40 | 429.40 | NA   |
| 893W2       | 893 | Mar   | Arable              | N    | N      | L    | S     | 3     | 7.70 | 757                              | 7.08  | 30.00  | 103    | 12.2    | 29.54 | 51.65  | 0.05  | 9.65  | 10.76 | 0.28  | NA   | 13.14 | 0.02    | 0.07  | 0.03  | 9.83  | 3.71  | 11.40 | 79.15  | 0.00 | 0.16  | 10.47 | NA     | 0.00   | NA     | NA     | NA   |
| 893W3       | 893 | Mar   | Arable              | N    | N      | L    | S     | 3     | 7.85 | 701                              | 11.66 | 40.00  | 75.2   | 7.91    | NA    | NA     | NA    | NA    | NA    | NA    | NA   | NA    | NA      | NA    | NA    | NA    | NA    | NA    | NA     | NA   | NA    | NA    | NA     | NA     | NA     | NA     | NA   |
| 893W4       | 893 | Jun   | Arable              | N    | N      | L    | S     | 3     | 8.45 | 484                              | 16.8  | 10.00  | 78.1   | 7.55    | 36.79 | 50.10  | 0.16  | 12.00 | 2.91  | 0.01  | NA   | 3.52  | 0.01    | 0.04  | 0.15  | 11.96 | 3.21  | 10.44 | 58.29  | 0.04 | 0.27  | NA    | 57.30  | NA     | 161.90 | 371.90 | NA   |
| 907W3       | 907 | May   | Grassland           | N    | N      | S    | D     | 3     | 7.85 | 319                              | 11.53 | 150.00 | 39.9   | 4.21    | 1.80  | 9.58   | 0.33  | 17.14 | 0.00  | 0.17  | NA   | 2.05  | 0.24    | 0.73  | 0.10  | 3.09  | 8.18  | 4.36  | 43.83  | NA   | 0.32  | 17.92 | NA     | NA     | NA     | NA     | NA   |
| 907W4       | 907 | Jun   | Grassland           | N    | N      | S    | D     | 3     | 6.89 | 309                              | 21.1  | NA     | 38.9   | 3.45    | 3.27  | 8.19   | 0.34  | 14.40 | 0.01  | 0.01  | NA   | 1.28  | 0.25    | 0.76  | 0.09  | 4.31  | 7.94  | 4.85  | 51.92  | 0.10 | 0.37  | NA    | 51.30  | NA     | 101.70 | 311.70 | NA   |
| 907W5       | 907 | Oct   | Grassland           | N    | N      | S    | D     | 3     | 6.44 | 199.5                            | 10.1  | NA     | 16.3   | 1.8     | 2.21  | 1.74   | 0.51  | 19.37 | 0.00  | 0.01  | NA   | 1.45  | 0.47    | 1.45  | 0.03  | 2.96  | 10.94 | 3.46  | 30.95  | 0.00 | 0.96  | 21.13 | 31.73  | NA     | 202.30 | 412.30 | NA   |
| 910W3       | 910 | May   | Grassland           | Y    | N      | L    | S     | 2     | 7.83 | 719                              | 10.87 | 40.00  | 86.2   | 9.22    | 19.65 | 90.57  | 0.06  | 13.98 | 5.47  | 0.03  | NA   | 7.24  | 0.04    | 0.13  | 0.02  | 9.81  | 2.23  | 11.56 | 114.82 | 0.00 | 0.20  | 16.36 | NA     | NA     | NA     | NA     | NA   |
| 911W2       | 911 | Mar   | Grassland           | N    | P      | L    | D     | 3     | 8.40 | 776                              | 5.71  | 125.00 | 73     | 9.02    | 47.69 | 76.85  | 1.32  | 20.34 | 0.92  | NA    | 0.14 | 5.83  | 1.23    | 3.77  | 0.09  | 23.15 | 31.41 | 21.42 | 106.58 | 0.05 | NA    | 21.32 | NA     | 0.04   | NA     | NA     | NA   |
| 911W3       | 911 | May   | Grassland           | N    | P      | L    | D     | 3     | 8.49 | 748                              | 10.77 | 160.00 | 38.4   | 4.12    | 41.42 | 47.21  | 0.89  | 21.95 | 0.05  | 0.04  | 0.00 | 1.77  | 0.87    | 2.66  | 0.02  | 20.28 | 22.44 | 17.93 | 115.74 | 0.02 | 0.06  | 22.25 | 46.74  | 0.00   | NA     | NA     | 0.09 |
| 911W4       | 911 | Jun   | Grassland           | N    | P      | L    | D     | 3     | 7.43 | 839                              | 19.8  | NA     | 39.1   | 3.35    | 45.31 | 31.21  | 1.48  | 19.71 | 0.02  | 0.02  | NA   | 1.66  | 1.17    | 3.59  | 0.31  | 18.09 | 20.35 | 14.87 | 99.89  | 0.07 | 0.11  | NA    | 55.30  | NA     | 166.20 | 376.20 | NA   |
| 939W3       | 939 | May   | Grassland           | Y    | N      | M    | S     | 3     | 7.42 | 388                              | 10.01 | 30.00  | 36.3   | 3.97    | 13.81 | 63.28  | 1.35  | 46.83 | 0.00  | 0.40  | NA   | 4.10  | 1.35    | 4.15  | -0.01 | 8.69  | 18.55 | 6.79  | 55.76  | 0.00 | 0.14  | 47.19 | NA     | NA     | NA     | NA     | NA   |
| 939W4       | 939 | Jun   | Grassland           | Y    | N      | M    | S     | 3     | 6.70 | 388                              | 18.7  | NA     | 27.2   | 2.48    | 12.27 | 6.99   | 1.49  | 46.06 | 0.04  | 0.02  | NA   | 3.82  | 0.85    | 2.59  | 0.64  | 3.94  | 5.19  | 5.19  | 21.60  | 0.02 | 0.59  | NA    | 3.75   | NA     | 49.70  | 259.70 | NA   |
| 940W2       | 940 | Mar   | Grassland           | Y    | N      | M    | S     | 3     | 8.64 | 390                              | 0.94  | 15.00  | 61.8   | 8.6     | 17.44 | 76.05  | 0.36  | 19.87 | 2.05  | NA    | 0.00 | 2.96  | 0.29    | 0.89  | 0.07  | 12.54 | 9.49  | 5.77  | 72.27  | 0.00 | NA    | 21.72 | NA     | 0.00   | NA     | NA     | NA   |
| 940W3       | 940 | May   | Grassland           | Y    | N      | M    | S     | 3     | 7.38 | 451                              | 8.81  | 40.00  | 8.6    | 0.96    | 16.46 | 46.30  | 0.33  | 31.96 | 0.04  | 0.33  | 0.00 | 2.73  | 0.22    | 0.67  | 0.11  | 9.45  | 3.33  | 6.90  | 95.46  | 0.00 | 0.16  | 33.17 | 97.03  | 0.00   | NA     | NA     | 0.37 |
| 940W4       | 940 | Jun   | Grassland           | Y    | N      | M    | S     | 3     | 6.96 | 509                              | 16.6  | NA     | 24.6   | 2.38    | 9.64  | 39.73  | 0.99  | 27.79 | 0.04  | 0.01  | NA   | 2.01  | 0.49    | 1.49  | 0.50  | 6.15  | 2.25  | 3.09  | 40.71  | 0.10 | 0.04  | NA    | 3.29   | NA     | 76.10  | 286.10 | NA   |
| 940W5       | 940 | Oct   | Grassland           | Y    | N      | M    | S     | 3     | 6.75 | 370                              | 10.4  | NA     | NA     | 8.11    | 2.41  | 0.35   | 22.09 | 0.00  | 0.00  | NA    | 1.37 | 0.23  | 0.71    | 0.11  | 7.59  | 4.96  | 4.83  | 67.15 | 0.00   | 0.77 | 25.03 | 68.61 | NA     | -79.10 | 130.90 | NA     |      |
| 942W2       | 942 | Mar   | Grassland           | N    | N      | M    | S     | 3     | 8.68 | 486                              | 9.51  | 30.00  | 90.9   | 11.5    | 20.73 | 76.96  | 0.02  | 9.17  | 0.08  | NA    | 0.00 | 0.87  | 0.01    | 0.03  | 0.00  | 7.82  | 26.55 | 15.08 | 64.08  | 0.00 | NA    | 10.58 | NA     | 0.00   | NA     | NA     | NA   |
| 942W3       | 942 | May   | Grassland           | N    | N      | M    | S     | 3     | 8.04 | 573                              | 11.7  | 60.00  | 69.8   | 7.34    | 9.76  | 144.08 | 0.09  | 10.97 | 0.00  | 0.06  | NA   | 1.01  | 0.07    | 0.21  | 0.02  | 5.42  | 15.64 | 11.43 | 77.65  | 0.00 | 0.12  | 12.88 | NA     | NA     | NA     | NA     | NA   |
| 942W4       | 942 | Jun   | Grassland           | N    | N      | M    | S     | 3     | 7.65 | 562                              | 17.5  | NA     | 35.7   | 3       |       |        |       |       |       |       |      |       |         |       |       |       |       |       |        |      |       |       |        |        |        |        |      |

| Sample Name | KH# | Month | General descriptors |      |        |      |       |       |      | Physical and Chemical parameters |       |       |        |         |       |       |      |       |       |       |      |       |         |       |       |       |       |       |        |      |       |       |        |       |    |    |       |  |
|-------------|-----|-------|---------------------|------|--------|------|-------|-------|------|----------------------------------|-------|-------|--------|---------|-------|-------|------|-------|-------|-------|------|-------|---------|-------|-------|-------|-------|-------|--------|------|-------|-------|--------|-------|----|----|-------|--|
|             |     |       | Landuse             | Reed | Canopy | Size | Depth | Perm. | pH   | Cond. µS                         | Temp  | Tiefe | O2 Sat | O2 mg/L | Cl    | SO4   | TP   | DOC   | NO3-N | NH4-N | NO2  | TN    | o-PO4-P | o-PO4 | TP    | Na    | K     | Mg    | Ca     | Br   | TFe   | TOC   | SAK    | NO2-N | E0 | Eh | An-N  |  |
| IW3         | I   | May   | Arable              | Y    | N      | L    | S     | 2     | 7.35 | 700                              | 8.25  | 30.00 | 20.1   | 3.41    | 27.19 | 95.48 | 0.85 | 33.22 | 0.73  | 0.31  | NA   | 3.77  | 0.55    | 1.69  | 0.30  | 15.11 | 20.19 | 14.32 | 107.29 | 0.00 | 0.55  | 33.87 | NA     | NA    | NA | NA | NA    |  |
| JW2         | J   | Mar   | Arable              | Y    | N      | M    | S     | 3     | 8.25 | 403                              | 6.92  | 40.00 | 28     | 3.3     | 13.82 | 70.28 | 0.08 | 15.07 | 0.15  | NA    | 0.00 | 1.61  | 0.04    | 0.11  | 0.05  | 3.41  | 23.69 | 7.10  | 56.53  | 0.00 | NA    | 15.85 | NA     | 0.00  | NA | NA | NA    |  |
| JW4         | J   | Jun   | Arable              | Y    | N      | M    | S     | 3     | 6.76 | 246                              | 22.22 | 5.00  | 11.8   | 0.99    | 11.38 | 2.10  | 0.21 | 17.93 | 0.00  | 0.01  | NA   | 0.90  | 0.18    | 0.56  | 0.03  | 8.24  | 2.80  | 6.48  | 65.91  | 0.00 | 0.12  | NA    | NA     | NA    | NA | NA | NA    |  |
| KW2         | K   | Mar   | Forest              | N    | Y      | M    | S     | 3     | 7.80 | 263                              | 10.06 | 50.00 | 116    | 12.7    | 17.56 | 35.88 | 0.06 | 29.16 | 3.56  | 0.07  | 0.52 | 6.29  | 0.01    | 0.03  | 0.05  | 4.18  | 9.02  | 4.57  | 17.70  | 0.00 | 0.09  | 30.36 | 67.75  | 0.16  | NA | NA | 3.79  |  |
| KW3         | K   | May   | Forest              | N    | Y      | M    | S     | 3     | 7.50 | 268                              | 16.19 | 30.00 | 24.9   | 2.41    | NA    | NA    | NA   | NA    | NA    | NA    | NA   | NA    | NA      | NA    | NA    | NA    | NA    | NA    | NA     | NA   | NA    | NA    | NA     | NA    | NA | NA | NA    |  |
| KW4         | K   | Jun   | Forest              | N    | Y      | M    | S     | 3     | 6.86 | 236                              | 20.03 | 15.00 | 2.9    | 0.79    | 12.92 | 0.33  | 1.33 | 58.46 | 0.00  | 1.09  | NA   | 6.82  | 1.48    | 4.54  | -0.15 | 5.92  | 14.50 | 6.85  | 24.82  | 0.00 | 0.82  | NA    | NA     | NA    | NA | NA | NA    |  |
| LW2         | L   | Mar   | Arable              | N    | P      | S    | D     | 3     | 7.60 | 443                              | 9.63  | 70.00 | 132    | 14.6    | 26.56 | 65.81 | 0.05 | 8.41  | 12.90 | 0.02  | 0.00 | 14.12 | 0.03    | 0.09  | 0.02  | 8.25  | 7.40  | 6.78  | 71.67  | 0.00 | 0.23  | 9.33  | NA     | 0.00  | NA | NA | 12.92 |  |
| LW3         | L   | May   | Arable              | N    | P      | S    | D     | 3     | 8.33 | 405                              | 13.94 | 60.00 | 34.5   | 3.5     | 13.59 | 78.90 | 1.57 | 27.68 | 0.05  | 0.17  | NA   | 3.09  | 0.96    | NA    | NA    | 3.39  | 29.09 | 8.33  | 51.42  | NA   | 0.15  | 33.67 | 92.14  | 0.00  | NA | NA | NA    |  |
| LW4         | L   | Jun   | Arable              | N    | P      | S    | D     | 3     | 7.39 | 304                              | 19.64 | 25.00 | 38     | 3.38    | 19.96 | 31.69 | 1.33 | 27.85 | 0.00  | 0.36  | NA   | 3.36  | 2.75    | 8.43  | -1.42 | 6.65  | 25.15 | 6.88  | 35.30  | 0.00 | 0.21  | NA    | NA     | NA    | NA | NA | NA    |  |
| MW2         | M   | Mar   | Arable              | N    | Y      | M    | S     | 2     | 7.73 | 611                              | 10.64 | 40.00 | 88     | 9.5     | 37.77 | 94.48 | 0.49 | 32.01 | 2.84  | 0.07  | 0.02 | 5.92  | 0.35    | 1.08  | 0.14  | 9.22  | 26.04 | 9.04  | 74.33  | 0.00 | 0.14  | 34.52 | 89.66  | 0.01  | NA | NA | 2.92  |  |
| MW3         | M   | May   | Arable              | N    | Y      | M    | S     | 2     | 8.35 | 811                              | 13.93 | 30.00 | 95.3   | 9.96    | 17.68 | 52.18 | 0.13 | 12.97 | 15.87 | 0.14  | NA   | 18.08 | 0.05    | NA    | NA    | 13.39 | 2.61  | 15.64 | 75.01  | 0.06 | -0.02 | 14.15 | 37.40  | 0.07  | NA | NA | NA    |  |
| NW2         | N   | Mar   | Arable              | N    | Y      | M    | S     | 3     | 7.46 | 451                              | 8.71  | 50.00 | 85     | 9.6     | 14.65 | 53.22 | 0.11 | 18.43 | 0.07  | 0.43  | 0.00 | 1.56  | 0.07    | 0.21  | 0.04  | 6.45  | 3.90  | 5.18  | 70.25  | 0.00 | 0.15  | 19.52 | 48.02  | 0.00  | NA | NA | 0.50  |  |
| NW3         | N   | May   | Arable              | N    | Y      | M    | S     | 3     | 7.93 | 455                              | 14.37 | 30.00 | 32.8   | 3.29    | 28.24 | 66.95 | 0.41 | 27.61 | 1.36  | 0.27  | NA   | 4.20  | 0.25    | NA    | NA    | 12.12 | 16.79 | 8.78  | 55.92  | 0.02 | 0.12  | 29.84 | 84.38  | 0.03  | NA | NA | NA    |  |
| NW4         | N   | Jun   | Arable              | N    | Y      | M    | S     | 3     | 7.35 | 475                              | 15.07 | 20.00 | 32.8   | 3.29    | 33.39 | 1.87  | 1.24 | 37.53 | 0.00  | 2.67  | NA   | 6.84  | 3.94    | 12.09 | -2.71 | 10.03 | 27.78 | 7.52  | 54.80  | 0.00 | 1.04  | NA    | NA     | NA    | NA | NA |       |  |
| OW3         | O   | May   | Forest              | Y    | Y      | L    | S     | 3     | 7.70 | 402                              | 18.86 | 20.00 | 11.5   | 1.17    | 10.25 | 58.58 | 0.81 | 37.24 | 0.02  | 0.81  | NA   | 3.03  | 0.47    | NA    | NA    | 5.75  | 5.61  | 5.29  | 56.74  | 0.05 | 0.47  | 38.73 | 137.49 | NA    | NA | NA | NA    |  |
| OW4         | O   | Jun   | Forest              | Y    | Y      | L    | S     | 3     | 7.13 | 245                              | 18.03 | 40.00 | 21.9   | 2.46    | 5.07  | 5.84  | 0.55 | 30.19 | 0.00  | 0.40  | NA   | 2.65  | 0.46    | 1.41  | 0.09  | 4.38  | 1.05  | 3.70  | 40.82  | 0.00 | 0.39  | NA    | NA     | NA    | NA | NA | NA    |  |
| PW2         | P   | Mar   | Forest              | Y    | Y      | L    | S     | 3     | 7.84 | 414                              | 5.65  | 30.00 | 62.1   | 7.57    | 14.63 | 51.04 | 0.05 | 13.95 | 0.03  | 0.04  | 0.00 | 1.06  | 0.02    | 0.05  | 0.04  | 6.02  | 3.30  | 5.32  | 65.39  | 0.00 | 0.11  | 14.54 | 33.60  | 0.00  | NA | NA | 0.07  |  |
| PW3         | P   | May   | Forest              | Y    | Y      | L    | S     | 3     | 7.79 | 494                              | 13.6  | 10.00 | 15.8   | 1.61    | 16.24 | 35.74 | 0.46 | 16.55 | 0.03  | 0.19  | NA   | 1.39  | 0.17    | NA    | NA    | 9.52  | 3.64  | 6.97  | 59.98  | 0.02 | 0.10  | 16.63 | 48.58  | NA    | NA | NA | NA    |  |
| PW4         | P   | Jun   | Forest              | Y    | Y      | L    | S     | 3     | 7.36 | 295                              | 17.13 | 10.00 | 20.6   | 1.93    | 11.61 | 7.20  | 0.27 | 23.10 | 0.00  | 0.78  | NA   | 2.83  | 0.21    | 0.63  | 0.06  | 8.18  | 1.55  | 5.47  | 65.80  | 0.00 | 0.25  | NA    | NA     | NA    | NA | NA | NA    |  |
| QW3         | Q   | May   | Forest              | N    | Y      | M    | S     | 3     | 7.66 | 296                              | 13.37 | 30.00 | 24.06  | 2.51    | 8.62  | 31.79 | 0.88 | 38.91 | NA    | 0.10  | NA   | 1.94  | 0.49    | NA    | NA    | 4.58  | 7.28  | 5.20  | 48.22  | 0.04 | 0.57  | 42.02 | 145.71 | NA    | NA | NA | NA    |  |
| QW4         | Q   | Jun   | Forest              | N    | Y      | M    | S     | 3     | 7.10 | 239                              | 19.19 | 30.00 | 23.1   | 2.07    | 14.62 | 8.35  | 0.67 | 44.12 | 0.00  | 0.09  | NA   | 2.72  | 0.56    | 1.71  | 0.11  | 13.20 | 4.44  | 3.89  | 38.67  | 0.00 | 0.68  | NA    | NA     | NA    | NA | NA | NA    |  |
| RW3         | R   | May   | Forest              | N    | Y      | M    | D     | 3     | 7.17 | 214                              | 13.34 | 70.00 | 21     | 2.15    | 5.86  | 47.77 | 0.31 | 32.57 | 0.01  | 0.23  | NA   | 1.74  | 0.13    | NA    | NA    | 2.96  | 4.37  | 3.17  | 33.82  | 0.04 | 0.69  | 34.28 | 127.62 | NA    | NA | NA | NA    |  |
| RW4         | R   | Jun   | Forest              | N    | Y      | M    | D     | 3     | 6.71 | 108                              | 21.34 | 80.00 | 24.5   | 2.1     | 4.05  | 18.14 | 0.38 | 34.07 | 0.00  | 0.14  | NA   | 2.44  | 0.25    | 0.77  | 0.13  | 2.86  | 3.08  | 2.24  | 30.91  | 0.00 | 1.17  | NA    | NA     | NA    | NA | NA | NA    |  |
| SW3         | S   | May   | Forest              | N    | P      | M    | S     | 3     | 8.39 | 523                              | 14.03 | 20.00 | 32.8   | 3.31    | 15.31 | 27.15 | 0.12 | 14.62 | 0.03  | 0.07  | NA   | 0.95  | 0.07    | NA    | NA    | 9.30  | 3.32  | 7.37  | 56.30  | 0.02 | 0.05  | 14.93 | 43.51  | 0.00  | NA | NA | NA    |  |
| SW4         | S   | Jun   | Forest              | N    | P      | M    | S     | 3     | 7.63 | 485                              | 17.51 | 40.00 | 27.8   | 2.58    | NA    | NA    | NA   | NA    | NA    | NA    | NA   | NA    | NA      | NA    | NA    | NA    | NA    | NA    | NA     | NA   | NA    | NA    | NA     | NA    | NA | NA | NA    |  |
| TW2         | T   | Mar   | Forest              | N    | P      | M    | S     | 2     | 7.23 | 86                               | 6.14  | 25.00 | 46.6   | 5.61    | 11.14 | 25.96 | 0.33 | 26.92 | 0.04  | 0.04  | 0.00 | 1.67  | 0.26    | 0.78  | 0.07  | 3.67  | 5.14  | 2.24  | 38.70  | 0.00 | 0.28  | 27.82 | 96.79  | 0.00  | NA | NA | 0.08  |  |
