# Supplementary material for: From microbes to mammals: pond biodiversity homogenization across different land-use types in an agricultural landscape
Source: bioRxiv or medRxiv preprint supplement (doi:10.1101/2022.01.28.477988), 2022-01-28
Supplement: Supplementary file [file media-5.pdf]

| Sample  | Eukaria | Bacteria | Archaea | Sample  | Eukaria | Bacteria | Archaea |
|---------|---------|----------|---------|---------|---------|----------|---------|
| OW4     | 183149  | 338735   | 376775  | 1599L4  | 354118  | 515201   | 404216  |
| 1189L2  | 264926  | 356406   | 310251  | 1599S4  | 238243  | 572844   | 362520  |
| 1189S2  | 473555  | 192563   | 201826  | 1599W1  | 290174  | 380651   | 300701  |
| 1189W2  | 79664   | 641175   | 0       | 1599W2  | 2079697 | 479829   | 133590  |
| 1189W3  | 418463  | 490723   | 292341  | 1599W3  | 329034  | 276676   | 197780  |
| 1189W4  | 247519  | 314464   | 252281  | 1604W2  | 229028  | 430989   | 376895  |
| 1228L2  | 357232  | 217493   | 0       | 1604W3  | 375649  | 341514   | 55851   |
| 1228L4  | 316891  | 603971   | 306007  | 1604W4  | 343778  | 404210   | 373376  |
| 1228S2  | 295147  | 143914   | 0       | 183L2   | 356618  | 227248   | 442879  |
| 1228S4  | 285187  | 569201   | 318048  | 183S2   | 421463  | 203169   | 444963  |
| 1228W2  | 84237   | 509013   | 0       | 187L2   | 357014  | 236318   | 417785  |
| 1228W3  | 273798  | 339618   | 295498  | 187S2   | 274663  | 211830   | 422253  |
| 1229W2  | 114986  | 330676   | 106123  | 187W2   | 308160  | 544476   | 0       |
| 1229W3  | 287072  | 330186   | 46517   | 187W3   | 463911  | 660483   | 422959  |
| 1338L4  | 437740  | 593038   | 193432  | 187W4   | 296308  | 437210   | 416603  |
| 1338S2  | 212965  | 268163   | 174973  | 190L2   | 298559  | 206849   | 374334  |
| 1338S4  | 265544  | 679512   | 638271  | 190S2   | 261257  | 259680   | 414894  |
| 1338W2  | 288036  | 511674   | 314124  | 190W2   | 991539  | 474921   | 458619  |
| 1338W3  | 383168  | 371250   | 159852  | 190W3   | 265892  | 276410   | 176439  |
| 133L2   | 326985  | 282754   | 374922  | 236L2   | 335904  | 206649   | 184816  |
| 133S2   | 291248  | 295123   | 450404  | 236S2   | 500100  | 251229   | 476713  |
| 135AW3  | 265588  | 335773   | 295120  | 2484L2  | 224273  | 428316   | 251687  |
| 135BW3  | 432613  | 449180   | 64302   | 2484S2  | 227688  | 403560   | 226060  |
| 136AW3  | 246815  | 378401   | 373324  | 2484W1  | 297337  | 298185   | 335385  |
| 136BW3  | 524813  | 299960   | 132990  | 2484W2  | 399639  | 659539   | 215003  |
| 149L2   | 407293  | 216184   | 66705   | 2484W3  | 353745  | 427094   | 285030  |
| 149S2   | 334391  | 256427   | 290813  | 2484W4  | 389024  | 315637   | 0       |
| 149W2   | 292889  | 468639   | 0       | 2489L2  | 356627  | 450917   | 280778  |
| 149W3   | 534207  | 330883   | 500242  | 2489S2  | 199450  | 412430   | 280528  |
| 149W4   | 364482  | 361183   | 356957  | 2489W3  | 328785  | 314491   | 223684  |
| 1510L2  | 234439  | 221779   | 246924  | 2489W4  | 254198  | 351772   | 174576  |
| 1510S2  | 379384  | 283675   | 113956  | 2565S2  | 365406  | 187849   | 111766  |
| 1510S4  | 260522  | 329435   | 329739  | 2565SL2 | 270245  | 204899   | 90194   |
| 1510SL1 | 351633  | 232938   | 93377   | 2565W2  | 916607  | 308667   | 0       |
| 1510W3  | 378975  | 599303   | 135532  | 2565W3  | 280644  | 262116   | 79539   |
| 1590L2  | 462713  | 200119   | 265897  | 2565W4  | 319301  | 289817   | 135979  |
| 1590S2  | 402720  | 245094   | 63791   | 258L1   | 277560  | 301863   | 214291  |
| 1590W1  | 512893  | 327063   | 281182  | 258L2   | 206800  | 447749   | 373061  |
| 1590W2  | 714437  | 288542   | 0       | 258S1   | 182626  | 339007   | 247337  |
| 1590W3  | 342331  | 353901   | 241933  | 258S2   | 386985  | 349053   | 339714  |
| 1590W4  | 247443  | 367296   | 212478  | 258W1   | 221679  | 351380   | 0       |
| 1598L2  | 200174  | 276622   | 428245  | 258W2   | 231281  | 434472   | 38355   |
| 1598S2  | 288308  | 240946   | 478666  | 258W3   | 272973  | 358970   | 431725  |
| 1598W2  | 1119992 | 401137   | 705278  | 258W4   | 243303  | 299508   | 293707  |
| 1598W3  | 324216  | 276077   | 323870  | 258W5   | 385828  | 444153   | 447905  |
| 1598W4  | 336114  | 358914   | 544019  | 259S1   | 439691  | 346108   | 161456  |

### Name Structure

KH(L/S/W)(1-5)

|       | Name              | Structure |
|-------|-------------------|-----------|
| KH    | KH name or number |           |
| L     | Deep sediment     |           |
| S     | Surface sediment  |           |
| W     | Water             |           |
| (1-5) | Campaign number   |           |
| 1     | Dec-16            |           |
| 2     | Mar-17            |           |
| 3     | May-17            |           |
| 4     | Jun-17            |           |
| 5     | Oct-17            |           |

| <b>Sample</b> | <b>Eukaria</b> | <b>Bacteria</b> | <b>Archaea</b> | <b>Sample</b> | <b>Eukaria</b> | <b>Bacteria</b> | <b>Archaea</b> |
|---------------|----------------|-----------------|----------------|---------------|----------------|-----------------|----------------|
| 259S2         | 211813         | 321458          | 0              | 311W3         | 377454         | 476585          | 147710         |
| 259W1         | 281696         | 291738          | 379859         | 312L1         | 568667         | 545052          | 58585          |
| 259W2         | 70492          | 528050          | 0              | 312L2         | 299190         | 286620          | 311707         |
| 259W3         | 337910         | 383182          | 244911         | 312S1         | 525172         | 338237          | 195854         |
| 259W4         | 251217         | 331156          | 354375         | 312S2         | 281651         | 239836          | 231302         |
| 259W5         | 380735         | 321106          | 434528         | 312W2         | 294347         | 378703          | 0              |
| 265L1         | 431606         | 432670          | 167739         | 312W3         | 387087         | 290682          | 325281         |
| 265L2         | 185675         | 416857          | 153590         | 312W4         | 365449         | 246398          | 221160         |
| 265S1         | 386907         | 387317          | 216485         | 312W5         | 606677         | 339632          | 322078         |
| 265S2         | 238149         | 353043          | 233711         | 319S4         | 319050         | 595081          | 327819         |
| 265W1         | 297849         | 354152          | 188839         | 319W3         | 256145         | 277799          | 221407         |
| 265W2         | 371670         | 278068          | 362514         | 40W2          | 355258         | 358129          | 0              |
| 265W3         | 378322         | 479131          | 308037         | 40W3          | 340034         | 414249          | 201015         |
| 265W4         | 381971         | 408263          | 325794         | 40W4          | 219936         | 279747          | 311032         |
| 265W5         | 280524         | 442300          | 388637         | 606L2         | 435809         | 195944          | 217316         |
| 269L1         | 632470         | 427077          | 205113         | 606S2         | 331334         | 215183          | 316302         |
| 269L2         | 246224         | 402854          | 36125          | 606W2         | 357868         | 190596          | 0              |
| 269S1         | 428488         | 358603          | 0              | 606W3         | 397068         | 479383          | 209925         |
| 269S2         | 285739         | 507634          | 0              | 606W4         | 344229         | 313681          | 380486         |
| 269W2         | 414677         | 428347          | 0              | 607L2         | 371634         | 204865          | 97585          |
| 269W3         | 584085         | 453696          | 168527         | 607S2         | 301478         | 207300          | 348383         |
| 269W4         | 234492         | 360926          | 244529         | 607W2         | 106863         | 622818          | 0              |
| 269W5         | 330024         | 325051          | 443067         | 607W3         | 586880         | 344971          | 204646         |
| 275L1         | 559108         | 312068          | 239970         | 607W4         | 252556         | 0               | 445777         |
| 275L2         | 229433         | 379797          | 220372         | 805L1         | 349006         | 260556          | 0              |
| 275S1         | 554937         | 465907          | 240303         | 805L2         | 373286         | 132612          | 0              |
| 275S2         | 181560         | 430916          | 289687         | 805S1         | 300618         | 247406          | 0              |
| 275W1         | 318948         | 386314          | 0              | 805S2         | 252989         | 278605          | 150119         |
| 275W2         | 512789         | 319469          | 0              | 805W2         | 486024         | 631476          | 0              |
| 275W3         | 284924         | 417404          | 501208         | 805W3         | 476119         | 322146          | 66958          |
| 275W4         | 303349         | 368540          | 160311         | 805W4         | 217902         | 223017          | 207575         |
| 275W5         | 277757         | 314591          | 106310         | 807L1         | 475557         | 367732          | 215039         |
| 287L2         | 290696         | 367572          | 121593         | 807L2         | 313467         | 239281          | 230930         |
| 287S2         | 189224         | 340318          | 0              | 807S1         | 284179         | 429728          | 231487         |
| 287SL1        | 399805         | 177205          | 101701         | 807S2         | 259918         | 210609          | 262900         |
| 287W2         | 196689         | 368073          | 42877          | 807W1         | 198223         | 383037          | 59258          |
| 287W3         | 333981         | 531043          | 230380         | 807W2         | 280062         | 692500          | 402968         |
| 287W4         | 238084         | 198302          | 307673         | 807W3         | 503361         | 485805          | 309091         |
| 287W5         | 320263         | 274298          | 317817         | 807W4         | 500903         | 343551          | 217001         |
| 28W2          | 660848         | 361595          | 130000         | 807W5         | 278968         | 453337          | 313178         |
| 28W3          | 234312         | 199109          | 341231         | 808L2         | 403040         | 353952          | 145647         |
| 28W4          | 228830         | 289283          | 78751          | 808S2         | 426238         | 420507          | 279746         |
| 311L1         | 486525         | 499396          | 261332         | 892L1         | 205892         | 283068          | 225037         |
| 311L2         | 337113         | 383799          | 136261         | 892L2         | 205037         | 209518          | 0              |
| 311S1         | 493278         | 325439          | 145678         | 892S1         | 206205         | 324965          | 133166         |
| 311S2         | 223868         | 384853          | 232004         | 892S2         | 193282         | 254854          | 128018         |

| Sample | Eukaria | Bacteria | Archaea | Sample | Eukaria | Bacteria | Archaea |
|--------|---------|----------|---------|--------|---------|----------|---------|
| 311W1  | 214936  | 326657   | 244988  | 892W1  | 211794  | 358763   | 313336  |
| 892W2  | 376321  | 487602   | 336148  | 893W3  | 373548  | 334934   | 353821  |
| 892W4  | 250401  | 278730   | 287045  | 893W4  | 269581  | 366905   | 458827  |
| 892W5  | 417543  | 320562   | 343395  | 907L1  | 180172  | 304910   | 220986  |
| 893L1  | 276895  | 404318   | 284479  | 907L2  | 323638  | 246414   | 0       |
| 893L2  | 245185  | 424897   | 224924  | 907S1  | 265182  | 388376   | 236879  |
| 893S1  | 216757  | 518490   | 246710  | 907S2  | 343366  | 148445   | 229927  |
| 893S2  | 353355  | 471252   | 381808  | 907W1  | 343167  | 354975   | 104614  |
| 893W1  | 231711  | 367551   | 253338  | 907W2  | 87191   | 610365   | 0       |
| 893W2  | 289182  | 298105   | 381014  | 907W3  | 269650  | 316300   | 299671  |
| 907W4  | 351078  | 273289   | 267202  | BW3    | 329900  | 343906   | 365051  |
| 907W5  | 385399  | 347848   | 294922  | BW4    | 342067  | 191940   | 164218  |
| 908L2  | 244968  | 325862   | 299353  | C11    | 340416  | 1E+06    | 338266  |
| 908S2  | 233907  | 363026   | 275043  | C12    | 310506  | 758218   | 265870  |
| 910L1  | 401867  | 338135   | 200883  | C13    | 370843  | 578882   | 233536  |
| 910L2  | 271203  | 337281   | 203902  | C14    | 370858  | 890708   | 91991   |
| 910S1  | 287216  | 134094   | 0       | C15    | 304455  | 741392   | 288578  |
| 910S2  | 240006  | 332775   | 211760  | C16    | 468494  | 785913   | 487243  |
| 910S4  | 278497  | 514597   | 333652  | CL2    | 194058  | 400186   | 0       |
| 910W2  | 93185   | 113331   | 0       | CS2    | 283444  | 387627   | 41593   |
| 910W3  | 272236  | 370088   | 368302  | DW2    | 99837   | 606738   | 154797  |
| 911L1  | 241951  | 365755   | 161410  | DW3    | 396814  | 490912   | 327586  |
| 911L2  | 152957  | 319036   | 153312  | DW4    | 389067  | 366322   | 268890  |
| 911S1  | 217950  | 365935   | 0       | EW2    | 344805  | 341115   | 0       |
| 911S2  | 175631  | 182843   | 89921   | EW3    | 246368  | 311229   | 263703  |
| 911W1  | 277829  | 358714   | 265592  | EW4    | 339326  | 257446   | 274561  |
| 911W2  | 354337  | 393003   | 316938  | EW5    | 397598  | 333740   | 250071  |
| 911W3  | 409040  | 338847   | 387078  | FW2    | 78124   | 575989   | 153282  |
| 911W4  | 290262  | 245737   | 326831  | FW3    | 265940  | 130344   | 256970  |
| 939L1  | 335301  | 268892   | 0       | FW4    | 224255  | 256594   | 237965  |
| 939L2  | 257515  | 269519   | 0       | GW2    | 67715   | 84341    | 0       |
| 939S1  | 376597  | 259373   | 88240   | GW3    | 511799  | 545806   | 462906  |
| 939S2  | 236262  | 410127   | 0       | GW4    | 370597  | 338800   | 80918   |
| 939W2  | 112659  | 517061   | 0       | HL2    | 404642  | 239382   | 315759  |
| 939W3  | 311588  | 507629   | 150657  | HL4    | 229003  | 281448   | 313411  |
| 939W4  | 301645  | 249858   | 430558  | HS2    | 346933  | 220205   | 272708  |
| 940L1  | 241341  | 292903   | 0       | HS4    | 205672  | 277857   | 216487  |
| 940L2  | 253446  | 360684   | 178024  | HW2    | 299607  | 352836   | 446196  |
| 940S1  | 338930  | 310238   | 0       | HW3    | 266690  | 225957   | 660923  |
| 940S2  | 163322  | 287598   | 171191  | IW2    | 481013  | 465829   | 158467  |
| 940W2  | 472725  | 394150   | 51912   | IW3    | 308992  | 490914   | 358100  |
| 940W3  | 292122  | 314779   | 417520  | JS2    | 247398  | 237962   | 221749  |
| 940W4  | 199125  | 290439   | 242956  | JW2    | 926638  | 532683   | 63627   |
| 940W5  | 388999  | 339411   | 300202  | JW4    | 261153  | 306556   | 374640  |
| 942L1  | 332300  | 374229   | 185449  | KL2    | 359793  | 172345   | 90889   |
| 942L2  | 238601  | 365465   | 269257  | KS2    | 168107  | 210090   | 194075  |

| <b>Sample</b> | <b>Eukaria</b> | <b>Bacteria</b> | <b>Archaea</b> | <b>Sample</b> | <b>Eukaria</b> | <b>Bacteria</b> | <b>Archaea</b> |
|---------------|----------------|-----------------|----------------|---------------|----------------|-----------------|----------------|
| 942S1         | 163635         | 294491          | 104520         | KW2           | 261090         | 382956          | 104605         |
| 942S2         | 193654         | 225092          | 261216         | KW3           | 400973         | 355405          | 255064         |
| 942W1         | 283158         | 304949          | 259565         | KW4           | 364754         | 241511          | 362172         |
| 942W2         | 386950         | 419576          | 399797         | LW2           | 318196         | 602138          | 138879         |
| 942W3         | 388869         | 397349          | 295183         | LW3           | 410901         | 349727          | 93975          |
| 942W4         | 397831         | 372577          | 443733         | LW4           | 394068         | 368961          | 197530         |
| 942W5         | 237704         | 304035          | 372861         | MW2           | 1617097        | 429502          | 223529         |
| AL2           | 282275         | 343564          | 0              | MW3           | 450032         | 170856          | 240035         |
| AS2           | 323057         | 397459          | 101195         | NW2           | 499916         | 357920          | 176774         |
| AW2           | 365831         | 403015          | 95631          | NW3           | 301281         | 289462          | 119955         |
| AW3           | 377738         | 456835          | 389756         | NW4           | 282939         | 360392          | 336395         |
| AW4           | 232282         | 272324          | 253424         | OL2           | 191277         | 238386          | 237656         |
| BL2           | 340407         | 403227          | 40683          | OS2           | 129673         | 216269          | 0              |
| BS2           | 229348         | 368709          | 218329         | OW2           | 1308380        | 327183          | 0              |
| BW2           | 303453         | 452424          | 0              | OW3           | 348915         | 283925          | 90979          |
| OW4           | 338704         | 329013          | 203091         |               |                |                 |                |
| PL2           | 169992         | 421391          | 283086         |               |                |                 |                |
| PS2           | 158404         | 474188          | 0              |               |                |                 |                |
| PW2           | 1835623        | 424640          | 118091         |               |                |                 |                |
| PW3           | 269534         | 337916          | 398867         |               |                |                 |                |
| PW4           | 324612         | 281190          | 658385         |               |                |                 |                |
| QL2           | 127540         | 218451          | 284333         |               |                |                 |                |
| QS2           | 144208         | 409089          | 0              |               |                |                 |                |
| QW2           | 1341696        | 355988          | 0              |               |                |                 |                |
| QW3           | 289699         | 348351          | 281474         |               |                |                 |                |
| QW4           | 320150         | 356004          | 168763         |               |                |                 |                |
| RL2           | 155295         | 461678          | 187994         |               |                |                 |                |
| RS2           | 136903         | 457300          | 0              |               |                |                 |                |
| RW2           | 907197         | 285416          | 0              |               |                |                 |                |
| RW3           | 384083         | 370668          | 278491         |               |                |                 |                |
| RW4           | 287807         | 323440          | 545586         |               |                |                 |                |
| SL2           | 178714         | 543781          | 308942         |               |                |                 |                |
| SS2           | 126776         | 423256          | 273081         |               |                |                 |                |
| SW2           | 263282         | 263282          | 0              |               |                |                 |                |
| SW3           | 264469         | 284462          | 110911         |               |                |                 |                |
| SW4           | 348624         | 501879          | 1008           |               |                |                 |                |
| TL4           | 420817         | 464739          | 373322         |               |                |                 |                |
| TS4           | 420583         | 632183          | 210343         |               |                |                 |                |
| TW2           | 513741         | 345270          | 67914          |               |                |                 |                |
| UW4           | 216831         | 359421          | 380273         |               |                |                 |                |
| 607W4A        | 0              | 359785          | 0              |               |                |                 |                |
| 1484W4        | 0              | 0               | 95084          |               |                |                 |                |
