# Supplementary material for: From microbes to mammals: pond biodiversity homogenization across different land-use types in an agricultural landscape
Source: bioRxiv or medRxiv preprint supplement (doi:10.1101/2022.01.28.477988), 2022-01-28
Supplement: Supplementary file [file media-6.pdf]

2 **Table S4.** Top 5 bacterial and eukaryotic indicator species. Taxa were sorted by decreasing significance (see color legend) and association coefficient (Co.).  
 3 The full results of the indicator species analysis are given in Supplementary dataset 2.

|                  |            | Arable                   |      | Forest                                                 |      | Grassland                   |      | Arable & Forest                |      | Arable & Grassland          |      | Forest & Grassland              |      |
|------------------|------------|--------------------------|------|--------------------------------------------------------|------|-----------------------------|------|--------------------------------|------|-----------------------------|------|---------------------------------|------|
|                  |            | Taxa                     | Co.  | Taxa                                                   | Co.  | Taxa                        | Co.  | Taxa                           | Co.  | Taxa                        | Co.  | Taxa                            | Co.  |
| Presence Absence | Bacteria   | <i>Acidovorax</i> sp.    | 0.39 | <i>Rhodopseudomonas</i> sp.                            | 0.73 | <i>Cyanobium</i> sp.        | 0.64 | <i>Alicyclobacillaceae</i> sp. | 0.57 | <i>Geitlerinema</i> sp.     | 0.71 | unc. <i>Myxococcales</i>        | 0.77 |
|                  |            | <i>Comamonas</i> sp.     | 0.39 | Unc. Forest soil bacterium ( <i>Acetobacteraceae</i> ) | 0.72 | <i>Commamonas</i> sp.       | 0.61 | <i>Pseudahrensia</i> sp.       | 0.63 | <i>Cyanobium</i> sp.        | 0.66 | <i>Ramlibacter</i> sp.          | 0.74 |
|                  |            | <i>Pedobacter</i> sp.    | 0.36 | <i>Burkholderia</i> sp.                                | 0.70 | <i>Nostoc</i> sp.           | 0.60 | <i>Bacillus</i> sp.            | 0.60 | <i>Erythromicrobium</i> sp. | 0.54 | <i>Cand. Kaiserbacteria</i> ;   | 0.74 |
|                  |            |                          |      | <i>Nocardioides</i> sp.                                | 0.67 | <i>Methanococcoides</i> sp. | 0.60 | <i>Gemmatimonas</i> sp.        | 0.58 | <i>Nostoc</i> sp.           | 0.65 | unc. <i>Rhizobiaceae</i>        | 0.71 |
|                  |            |                          |      | Unc. <i>Sphingomonadaceae</i>                          | 0.66 | <i>Elusimicrobium</i> sp.   | 0.58 | <i>Flavobacterium</i> sp.      | 0.57 | <i>Pedobacter</i> sp.       | 0.63 | <i>Mucinivorans</i> sp.         | 0.68 |
|                  | Eukaryotes |                          |      | <i>Helicoon</i> sp.                                    | 0.67 | <i>Myxobolus</i> sp.        | 0.48 | <i>Coccomyxa</i> sp.           | 0.61 | <i>Chroomonas</i> sp.       | 0.59 | <i>Chaetonotus</i> sp.          | 0.66 |
|                  |            |                          |      | <i>Hydryphantes</i> sp.                                | 0.62 | <i>Ptychogastria</i> sp.    | 0.48 | <i>Xironogiton</i> sp.         | 0.49 | <i>Fistulifera</i> sp.      | 0.52 | <i>Chondrostereum</i> sp.       | 0.62 |
|                  |            |                          |      | <i>Ochrolechia</i> sp.                                 | 0.61 | <i>Pterula</i> sp.          | 0.45 | <i>Castrada</i> sp.            | 0.49 | <i>Sigara</i> sp.           | 0.51 | <i>Sorghum</i> sp.              | 0.60 |
|                  |            |                          |      | <i>Macrostromum</i> sp.                                | 0.60 | <i>Nephroma</i> sp.         | 0.41 | <i>Closterium</i> sp.          | 0.48 | <i>Ankistrodesmus</i> sp.   | 0.52 | <i>Coccophagus</i> sp.          | 0.59 |
|                  |            |                          |      | <i>Chloroscypha</i> sp.                                | 0.59 | <i>Andreaea</i> sp.         | 0.56 | <i>Oocystella</i> sp.          | 0.47 | <i>Chlorella</i> sp.        | 0.50 | <i>Marchandiomyces</i> sp.      | 0.59 |
| Quantitative     | Bacteria   | <i>Comamonas</i> sp.     | 0.39 | <i>Rhodoluna</i> sp.                                   | 0.95 | Unc. <i>Parcubacteria</i>   | 0.99 | <i>Beijerinckia</i> sp.        | 0.93 | <i>Polynucleobacter</i> sp. | 0.94 | <i>Novosphingobium</i> sp.      | 0.93 |
|                  |            |                          |      | <i>Novosphingobium</i> sp.                             | 0.92 | <i>Calothrix</i> sp.        | 0.89 | <i>Pragia</i> sp.              | 0.76 | <i>Tabrizicola</i> sp.      | 0.88 | <i>Crenothrix</i> sp.           | 0.90 |
|                  |            |                          |      | <i>Novosphingobium</i> sp.                             | 0.86 | Unc. <i>Cyanobacterium</i>  | 0.85 | <i>Sphingomonas</i> sp.        | 0.64 | <i>Hydrogenophaga</i> sp.   | 0.83 | Unc. <i>Gammaproteobacteria</i> | 0.89 |
|                  |            |                          |      | <i>Microbacteriaceae</i> sp.                           | 0.84 | <i>Cyanobium</i> sp.        | 0.79 | Unc. <i>Pseudahrensia</i>      | 0.63 | Unc. <i>Sporichthyaceae</i> | 0.87 | <i>Sphingomonas</i> sp.         | 0.89 |
|                  |            |                          |      | <i>Sphaerotilus</i> sp.                                | 0.84 | <i>Methanogranum</i> sp.    | 0.78 | <i>Phyllobacterium</i> sp.     | 0.60 | <i>Persicitalea</i> sp.     | 0.78 | <i>Phenilobacterium</i> sp.     | 0.89 |
|                  | Eukaryotes | Unc. <i>Leucocryptos</i> | 0.44 | <i>Helicascus</i> sp.                                  | 0.94 | <i>Pterospora</i> sp.       | 0.44 | <i>Aspergillus</i> sp.         | 0.84 | Unc. <i>Cryptomycota</i>    | 0.86 | <i>Pseudodiptomus</i> sp.       | 0.73 |
|                  |            |                          |      | <i>Chromophyton</i> sp.                                | 0.87 | <i>Roya</i> sp.             | 0.41 | <i>Castrella</i> sp.           | 0.86 | <i>Rhabditida</i> sp.       | 0.76 | <i>Isotomiella</i> sp.          | 0.68 |
|                  |            |                          |      | <i>Laevapex</i> sp.                                    | 0.82 | <i>Eucyclops</i> sp.        | 0.83 | <i>Daphnia</i> sp.             | 0.70 | Unc. <i>Pedinellales</i>    | 0.67 | <i>Pinnularia</i> sp.           | 0.64 |
|                  |            |                          |      | <i>Trapelia</i> sp.                                    | 0.79 | <i>Diplodinium</i> sp.      | 0.57 | <i>Vorticella</i> sp.          | 0.81 | <i>Cryptomonas</i> sp.      | 0.85 | Unc. <i>Harpacticoida</i> sp.   | 0.63 |
|                  |            |                          |      | <i>Helicoon</i> sp.                                    | 0.74 | <i>Haplosporidium</i> sp.   | 0.54 | <i>Pinnularia</i> sp.          | 0.71 | <i>Amphora</i> sp.          | 0.65 | <i>Coccophagus</i> sp.          | 0.59 |

4

|          |               |              |
|----------|---------------|--------------|
| P<=0.001 | 0.001<P<=0.01 | 0.01<P<=0.05 |
|----------|---------------|--------------|

5
